# Supplementary material for: Modular synthesis of pyrrole-fused heterocycles via glucose-mediated nitro-reductive cyclization
Source: Royal Society of Chemistry journal article supplement (doi:10.1039/d4ob00741g), 2024-01-01
Supplement: d4ob00741g1.pdf [file d4ob00741g1.pdf]

# Supporting Information

## **Biomass-derived glucose-mediated nitro-reductive cyclization: Modular synthesis of pyrrole-fused heterocycles**

Surabhi Panday,<sup>a</sup> Amitava Hazra,<sup>a</sup> Pankaj Gupta,<sup>a</sup> Srimanta Manna<sup>a\*</sup> and Joydev K. Laha<sup>a\*</sup>

*<sup>a</sup>Department of Pharmaceutical Technology (Process Chemistry),*

*National Institute of Pharmaceutical Education and Research,*

*S. A. S. Nagar, Punjab 160062,*

*India*

*E-mail: [srimanta@niper.ac.in](mailto:srimanta@niper.ac.in), [jlaha@niper.ac.in](mailto:jlaha@niper.ac.in)*

### **Table of Contents**

|                                                         |                |
|---------------------------------------------------------|----------------|
| <b>1. GENERAL CONSIDERATION.....</b>                    | <b>S2</b>      |
| <b>2. EXPERIMENTAL SECTION.....</b>                     | <b>S3-S9</b>   |
| <b>3. GREEN CHEMISTRY METRICS.....</b>                  | <b>S10-S12</b> |
| <b>4. CHARACTERIZATION DATA.....</b>                    | <b>S13-S19</b> |
| <b>5. REFERENCES.....</b>                               | <b>S20</b>     |
| <b>6. <sup>1</sup>H AND <sup>13</sup>C SPECTRA.....</b> | <b>S21-S49</b> |
| <b>7. MASS SPECTRA.....</b>                             | <b>S50-S51</b> |

## 1. GENERAL CONSIDERATION

Unless noted otherwise, all reagents and solvents were purchased from commercial sources and used as received. The glassware to be used in the reaction was thoroughly washed and dried in an oven and the experiments were carried out with the required precautions. Reactions were monitored by TLC, which was performed with 0.2 mm Merck pre-coated silica gel 60 F254 Aluminium sheets. TLC plates were visualized with UV light and column chromatography was performed using silica gel (60-120, 100-200, or 230-400 mesh). New compounds were characterized by melting point,  $^1\text{H}$  NMR,  $^{13}\text{C}$  NMR, IR, and HRMS data. High-Resolution Mass Spectra (HRMS) were obtained using the Electron spin ionization (ESI) technique and as a TOF mass analyzer. All melting points were taken using a melting point apparatus equipped with a calibrated thermometer and are uncorrected.  $^1\text{H}$  and  $^{13}\text{C}$  spectra were recorded on Jeol 500, 600 MHz, and 125, 150 MHz NMR spectrometers in  $\text{CDCl}_3$  and  $\text{DMSO-}d_6$  with residual undeuterated solvent ( $\text{CDCl}_3$ : 7.26/7.00) using  $\text{Me}_3\text{SiCl}$  as an internal standard. Chemical shifts ( $\delta$ ) are given in ppm and  $J$  values are given in Hz, pattern was designated as s, singlet; bs, broad singlet; d, doublet; dd, doublet of doublet; dt, triplet of doublet; t, triplet; m, multiplet.

## 2. EXPERIMENTAL SECTION

### Representative procedure for one-pot synthesis of pyrrolo[1,2-*a*] quinoxalines (**3a-o**)<sup>1</sup>

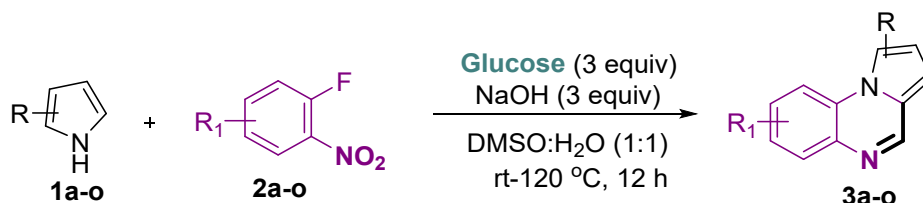

To a stirred solution of pyrrole/substituted pyrrole (1 mmol) in DMSO (1 mL), NaOH (1.5 mmol) and 1-fluoro-2-nitrobenzene derivatives (1.1 mmol) were added slowly. The reaction mixture was then stirred vigorously for 2 h at room temperature. Then D-glucose (3 mmol), NaOH (1.5 mmol), and H<sub>2</sub>O (1 mL) were added to the reaction mixture and heated at 120 °C for 12h. After completion of the reaction, as monitored by TLC, the reaction mixture was diluted with saturated brine solution and extracted with EtOAc (20 mL × 3). The organic layer was combined and dried over anhydrous sodium sulfate (Na<sub>2</sub>SO<sub>4</sub>). Finally, the solvent was evaporated under reduced pressure and purified by silica gel column chromatography to obtain the desired product **3a-o** in a quantitative yield of about 70-90%.

### Representative procedure for one-pot synthesis of pyrrolo[1,2-*a*] quinoxaline-4(5*H*)-one (**6a-o**)<sup>1</sup>

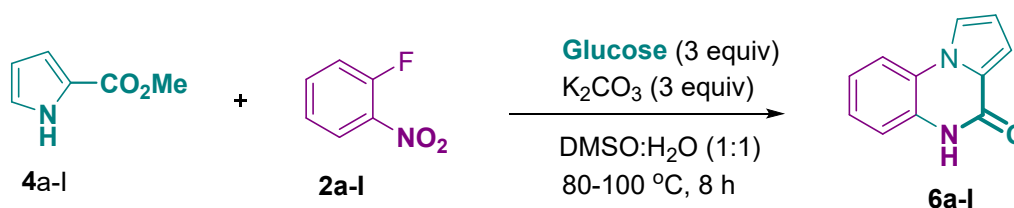

To a stirred solution of methyl pyrrole-2-carboxylate (1 mmol) in DMSO (1 mL), K<sub>2</sub>CO<sub>3</sub> (1.5 mmol) and 1-fluoro-2-nitrobenzene derivatives (1.1 mmol) were added slowly sequentially. The reaction mixture was then stirred vigorously for 2 h at 80 °C. Then D-glucose (3 mmol), K<sub>2</sub>CO<sub>3</sub>/NaOH (1.5 mmol), and H<sub>2</sub>O (1 mL) were added to the reaction mixture and kept for heating at 100 °C for 8 h. After completion of the reaction, as monitored by TLC, the reaction mixture was diluted with saturated brine solution and extracted with EtOAc (20 mL × 3). The organic layer was combined and dried over anhydrous sodium sulfate (Na<sub>2</sub>SO<sub>4</sub>). Finally, the

solvent was evaporated under reduced pressure and purified by silica gel column chromatography to obtain the desired product **6a-i** in a quantitative yield of about 75-90%.

**Representative procedure for one-pot gram scale synthesis of pyrrolo[1,2-a] quinoxalines (3a)<sup>1</sup>**

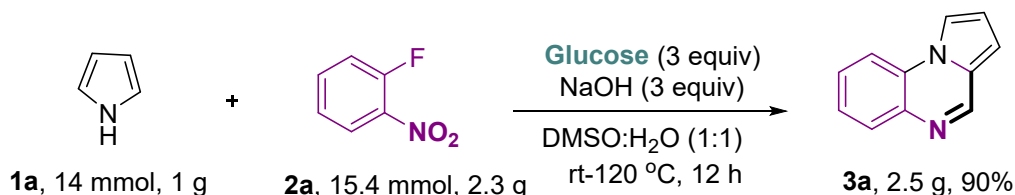

To a stirred solution of pyrrole/substituted pyrrole (14 mmol, 1 g) in DMSO (14 mL), NaOH (21 mmol, 0.840 g) and 1-fluoro-2-nitrobenzene derivatives (16 mmol) were added slowly. The reaction mixture was then stirred vigorously for 2 h at room temperature. Then D-glucose (42 mmol, 7.5 g), NaOH (21 mmol, 0.840) and H<sub>2</sub>O (10 mL) were added to the reaction mixture and heated at 120 °C for 12h. After completion of the reaction, as monitored by TLC, the reaction mixture was diluted with saturated brine solution and extracted with EtOAc (20 mL × 3). The organic layer was combined and dried over anhydrous sodium sulfate (Na<sub>2</sub>SO<sub>4</sub>). Finally, the solvent was evaporated under reduced pressure and purified by silica gel column chromatography to obtain the desired product **3a** in a quantitative yield of about 90%.

**Representative procedure for one-pot synthesis of 7-(trifluoromethyl)pyrrolo[1,2-a] quinoxaline-4(5H)-one (6d)<sup>1</sup>**

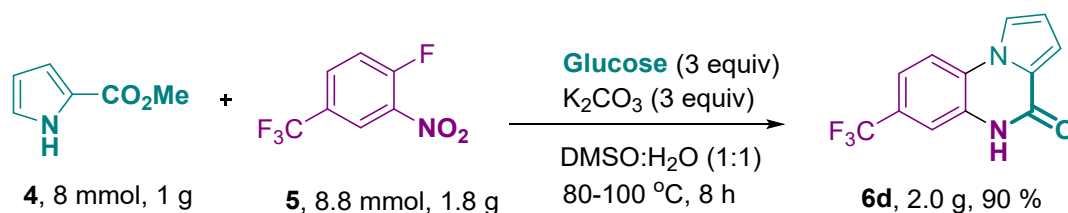

To a stirred solution of methyl pyrrole-2-carboxylate (8 mmol, 1 g) in DMSO (8 mL), K<sub>2</sub>CO<sub>3</sub> (12 mmol, 1.5 g) and 1-fluoro-2-nitro-4-(trifluoromethyl)benzene (8.8 mmol, 1.8 g) were added slowly sequentially. The reaction mixture was then stirred vigorously for 2 h at 80 °C. Then D-glucose (24 mmol, 4 g), K<sub>2</sub>CO<sub>3</sub> (12 mmol, 1.5 g), and H<sub>2</sub>O (8 mL) were added to the reaction mixture and kept for heating at 100 °C for 8 h. After completion of the reaction, as monitored by TLC, the reaction mixture was diluted with saturated brine solution and extracted with EtOAc (20 mL × 3). The organic layer was combined and dried over anhydrous sodium sulfate (Na<sub>2</sub>SO<sub>4</sub>). Finally, the solvent was evaporated under reduced pressure and purified by

silica gel column chromatography to obtain the desired product **6a-i** in a quantitative yield of about 75-90%.

### Representative procedure for one-pot synthesis of bioactive pyrrole fused moieties (**8**, **10,12**)

#### (i) Representative procedure for one-pot synthesis of Pyrrolo[1,2-*a*][1,4]diazepin-11-one (**8**)<sup>2</sup>

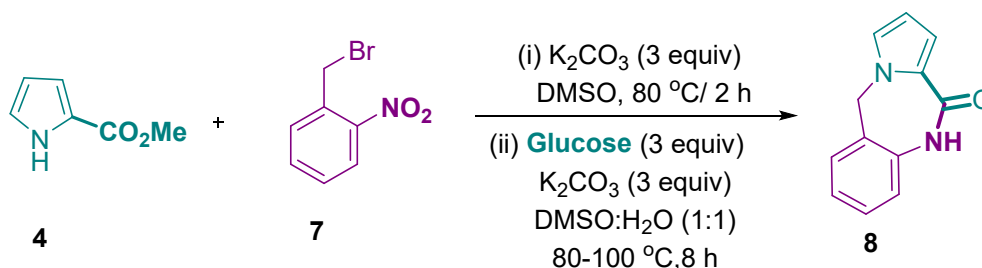

To a stirred solution of pyrrole/substituted pyrrole-2-carboxylate (1 mmol) in DMSO (1 mL),  $\text{K}_2\text{CO}_3$  (1.5 mmol) and 2- nitrobenzyl bromide (1.1 mmol) was added slowly. The reaction mixture was then stirred vigorously for 2 h at 80 °C. Then D-glucose (3 mmol),  $\text{K}_2\text{CO}_3$  (1.5 mmol), and  $\text{H}_2\text{O}$  (1 mL) were added to the reaction mixture and kept for heating at 100 °C for 8h. After completion of the reaction, as monitored by TLC, the reaction mixture was diluted with saturated brine solution and extracted with EtOAc (20 mL  $\times$  3). The organic layer was combined and dried over anhydrous sodium sulfate ( $\text{Na}_2\text{SO}_4$ ). Finally, the solvent was evaporated under reduced pressure and purified by silica gel column chromatography to obtain the desired product **8** in a quantitative yield of about 80%.

#### (ii) Representative procedure for the synthesis of 6-fluoropyrrolo[1,2-*a*]quinoxaline-4(5*H*)-one (**12**)<sup>3</sup>

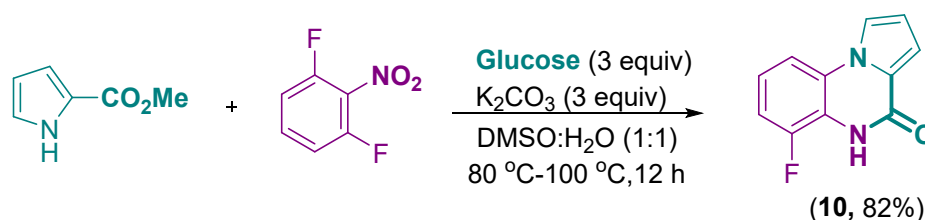

To a stirred solution of pyrrole (1 mmol) in DMSO (1 mL),  $\text{K}_2\text{CO}_3/\text{NaOH}$  (1.5 mmol) and 1,3-difluoro-2-nitrobenzene (1.1 mmol) were added slowly. The reaction mixture was then stirred vigorously for 2 h at 80 °C. Then D-glucose (3 mmol),  $\text{K}_2\text{CO}_3/\text{NaOH}$  (1.5 mmol), and  $\text{H}_2\text{O}$  (1 mL) were added to the reaction mixture and heated at 100 °C for 10h. After completion of the

reaction, as monitored by TLC, the reaction mixture was diluted with saturated brine solution and extracted with EtOAc (20 mL  $\times$  3). The organic layer was combined and dried over anhydrous sodium sulfate ( $\text{Na}_2\text{SO}_4$ ). Finally, the solvent was evaporated under reduced pressure and purified by silica gel column chromatography to obtain the desired product **10** in a quantitative yield of about 82%.

### Representative procedure for the experimental evidence for 2-pyrrolyl aniline (**2a**)

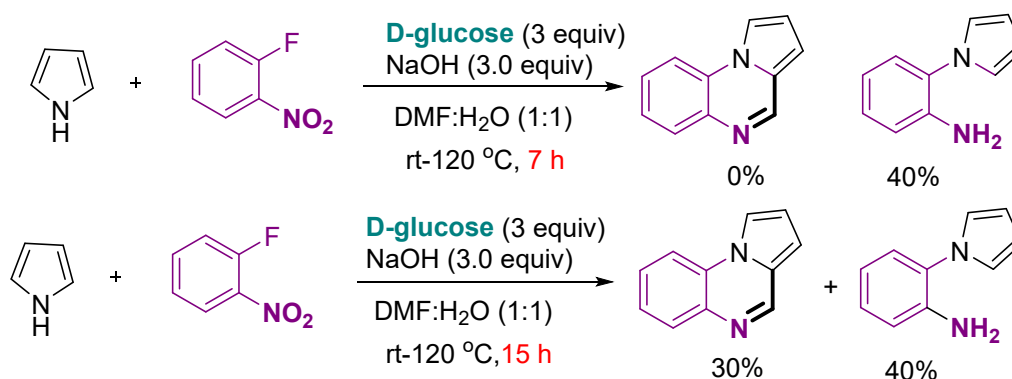

To a stirred solution of pyrrole (1 mmol) in DMF (1 mL), NaOH (1.5 mmol) and 1-fluoro-2-nitrobenzene derivatives (1.1 mmol) were added slowly. The reaction mixture was then stirred vigorously for 2 h at room temperature. Then D-glucose (3 mmol), NaOH (1.5 mmol) and  $\text{H}_2\text{O}$  (1 mL) were added to the reaction mixture and heated at  $120^\circ\text{C}$  for 7h. The pyrrolyl aniline was seen as a fluorescent spot in the TLC with an  $R_f$  different from the pyrroloquinoxaline (also seen as a fluorescent spot). After completion of the reaction, as monitored by TLC, the reaction mixture was diluted with saturated brine solution and extracted with EtOAc (20 mL  $\times$  3). The organic layer was combined and dried over anhydrous sodium sulfate ( $\text{Na}_2\text{SO}_4$ ). Finally, the solvent was evaporated under reduced pressure and purified by silica gel column chromatography to obtain the desired product in a quantitative yield of about 40%. Furthermore, again the same reaction was set up and kept for 15 h, and the corresponding pyrroloquinoxaline formation could be seen to the extent of 30 %.

### Representative procedure for the experimental evidence for deuterium incorporation

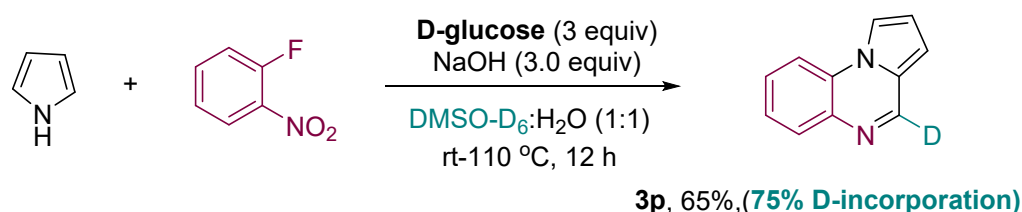

To a stirred solution of pyrrole (1 mmol) in DMSO- $D_6$  (1 mL), NaOH (1.5 mmol) and 1-fluoro-2-nitrobenzene derivatives (1.1 mmol) were added slowly. The reaction mixture was then stirred vigorously for 2 h at room temperature. Then D-glucose (3 mmol), NaOH (1.5 mmol) and  $D_2O$  (1 mL) were added to the reaction mixture and heated at 120 °C for 12h. The deuterated pyrroloquinoxaline was seen as a fluorescent spot in the TLC. After completion of the reaction, as monitored by TLC, the reaction mixture was diluted with saturated brine solution and extracted with EtOAc (20 mL  $\times$  3). The organic layer was combined and dried over anhydrous sodium sulfate ( $Na_2SO_4$ ). Finally, the solvent was evaporated under reduced pressure and purified by silica gel column chromatography to obtain the desired product in a quantitative yield of about 65%.

### Representative procedure for the test for the intermediates in the reaction

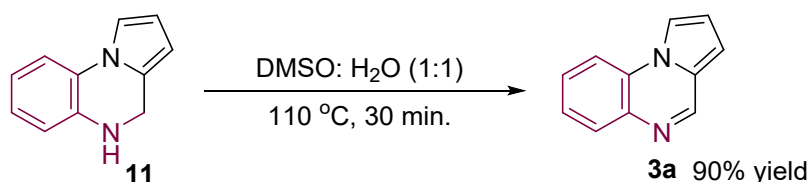

A solution of 4,5-dihydropyrroloquinoxaline (**11**) (1 mmol) in DMSO:  $H_2O$  (2 mL). The reaction mixture was then stirred vigorously for 30 min at 110 °C. After half an hour of reaction, it was seen that 4,5-dihydropyrroloquinoxaline (**11**) was oxidised to pyrroloquinoxaline (**3a**). completion of the reaction, as monitored by TLC, the reaction mixture was diluted with saturated brine solution and extracted with EtOAc (20 mL  $\times$  3). The organic layer was combined and dried over anhydrous sodium sulfate ( $Na_2SO_4$ ). Finally, the solvent was evaporated under reduced pressure and purified by silica gel column chromatography to obtain the desired product in a quantitative yield (**3a**) of about 90%.

### Representative procedure for the control experiment with formic acid

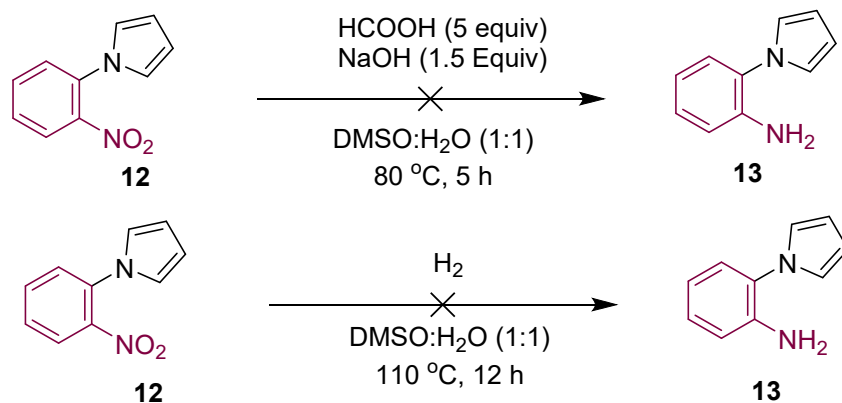

To a stirred solution of 1-(2-nitrophenyl)-1H-pyrrole (**12**) (1 mmol) in DMSO: H<sub>2</sub>O (2 mL) was added Formic acid (5 mmol) and NaOH (1.5 mmol). The reaction mixture was then stirred vigorously for 5 h at 80 °C. However, no reduced product formation could be seen. Hence forth, same reaction was kept in the absence of formic acid and NaOH, purging the hydrogen gas (H<sub>2</sub>) and heated for 120 °C for 12 h but the 2-pyrrolyl aniline formation could not be seen.

### Representative procedure for the experimental setup required to investigate the pH needed for the standard reaction

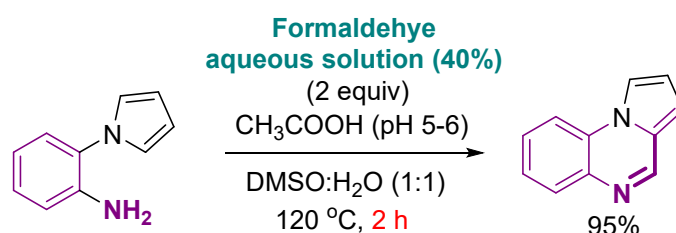

To a stirred solution of pyrrole aniline (0.5 mmol) in DMSO: H<sub>2</sub>O (1:1, 2 mL), NaOH (1.5 mmol) and 1-fluoro-2-nitrobenzene derivatives (1.1 mmol) were added slowly. Further Aq. formaldehyde solution (40%, 1 mL) was added and pH of 5 was maintained with CH<sub>3</sub>COOH monitored by pH paper. The reaction mixture was then stirred vigorously for 2 h at room temperature. After completion of the reaction, as monitored by TLC, the fluorescent spot of pyrroloquinoxaline was seen. The reaction mixture was diluted with saturated brine solution and extracted with EtOAc (20 mL × 3), the organic layer was combined and dried over anhydrous sodium sulfate (Na<sub>2</sub>SO<sub>4</sub>). Finally, the solvent was evaporated under reduced pressure and purified by silica gel column chromatography to obtain the desired product in a quantitative yield of about 95%.

### Representative procedure for the experimental investigation to check the change of pH during the course of the reaction

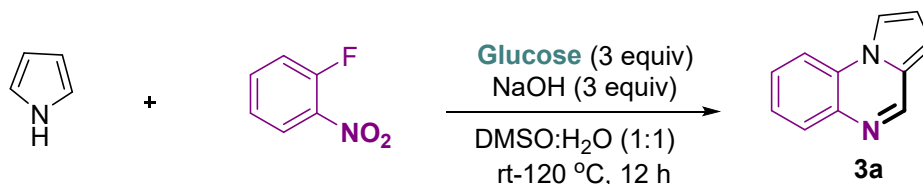

To a stirred solution of pyrrole/substituted pyrrole (0.5 mmol) in DMSO (0.5 mL), NaOH (0.75 mmol) and 1-fluoro-2-nitrobenzene derivatives (0.6 mmol) were added slowly. The reaction mixture was then stirred vigorously for 2 h at room temperature. Then D-glucose (1.5 mmol), NaOH (0.75 mmol), and H<sub>2</sub>O (0.5 mL) were added to the reaction mixture and heated at 120



°C for 12 h. The aliquots of the sample were withdrawn followed by the dilution of the reaction mixture with ethylacetate (EtOAc) and checked the pH using pH meter. As recorded the pH was found to decrease from 8.0 to 6.8.

| Sr.No. | Time Interval | pH measured<br>(from pH<br>meter) |
|--------|---------------|-----------------------------------|
| 1.     | 2 h           | 8.0                               |
| 2.     | 4 h           | 7                                 |
| 3.     | 6 h           | 6.8                               |
| 4.     | 8 h           | 6                                 |

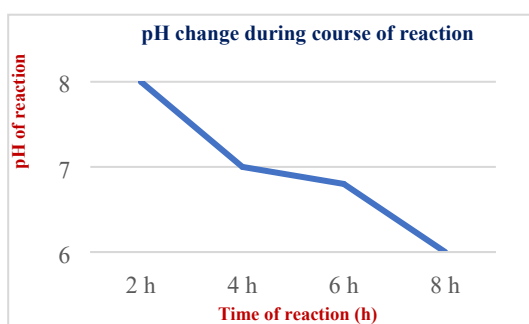

**Figure 1.** Graphical presentation of change of pH during reaction

**Representative procedure for the mass studies to investigate the formation of intermediates for the synthesis of pyrrole fused *N* heterocycles**

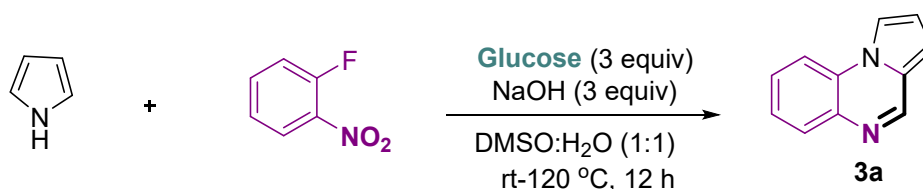

To a stirred solution of pyrrole/substituted pyrrole (0.5 mmol) in DMSO (0.5 mL), NaOH (0.75 mmol) and 1-fluoro-2-nitrobenzene derivatives (0.6 mmol) were added slowly. The reaction mixture was then stirred vigorously for 2 h at room temperature. Then D-glucose (1.5 mmol), NaOH (0.75 mmol), and H<sub>2</sub>O (0.5 mL) were added to the reaction mixture and heated at 120 °C for 12h. The aliquots of the sample were withdrawn and the samples were prepared for a crude mixture using HPLC grade MeOH and mass spectra were recorded.

### 3. GREEN CHEMISTRY METRICS

|                                                            |                                 |                  |                       |                 |
|------------------------------------------------------------|---------------------------------|------------------|-----------------------|-----------------|
|                                                            |                                 |                  |                       |                 |
| <b>A) Reaction Stage</b>                                   |                                 |                  |                       |                 |
| <b>i)</b>                                                  | <b>Substrate</b>                | <b>Mass (g)</b>  | <b>Mol. Wt.</b>       | <b>Mol</b>      |
|                                                            | 1a                              | 1.00             | 67                    | 0.014           |
|                                                            | 2a                              | 2.31             | 141                   | 0.016           |
| <b>ii)</b>                                                 | <b>Reagents</b>                 | <b>Mass (g)</b>  | <b>Mol. Wt.</b>       | <b>Mol</b>      |
|                                                            | Glucose                         | 7.56             | 180                   | 0.042           |
|                                                            | NaOH                            | 1.68             | 40                    | 0.042           |
| <b>iii)</b>                                                | <b>Reaction Solvents</b>        | <b>Vol. (mL)</b> | <b>Density (g/mL)</b> | <b>Mass (g)</b> |
|                                                            | DMSO                            | 14               | 1.1                   | 15.4            |
|                                                            | H <sub>2</sub> O                | 14               | 1.0                   | 14              |
|                                                            | Total solvents                  |                  |                       | 29.4            |
|                                                            | <b>Total Reaction Materials</b> | <b>41.95 g</b>   |                       |                 |
| <b>B) Work-up Stage (Filtration and Recrystallization)</b> |                                 |                  |                       |                 |
|                                                            | <b>Materials</b>                | <b>Vol. (mL)</b> | <b>Density (g/mL)</b> | <b>Mass (g)</b> |
|                                                            | H <sub>2</sub> O                | 15               | 1.0                   | 15              |
|                                                            | AcOEt                           | 15               | 0.902                 | 13.5            |
|                                                            | Cyclohexane                     | 10               | 0.779                 | 7.79            |
|                                                            | <b>Total Workup Materials</b>   | <b>36.29 g</b>   |                       |                 |
|                                                            | <b>Total Input Materials</b>    | <b>78.24 g</b>   |                       |                 |
|                                                            | <b>Output Target Product</b>    | <b>Mass (g)</b>  | <b>Mol. Wt.</b>       |                 |
|                                                            | 3a                              | 2.2              | 168.20                |                 |

| Green Metrics Analysis    |       |  |  |
|---------------------------|-------|--|--|
| Yield (%)                 | 95    |  |  |
| Conversion (%)            | 100   |  |  |
| AE (%)                    | 80.7  |  |  |
| RME (%)                   | 66.4  |  |  |
| PMI <sub>[Reaction]</sub> | 19.00 |  |  |
| PMI <sub>[Workup]</sub>   | 16.49 |  |  |
| PMI <sub>[Total]</sub>    | 35.49 |  |  |

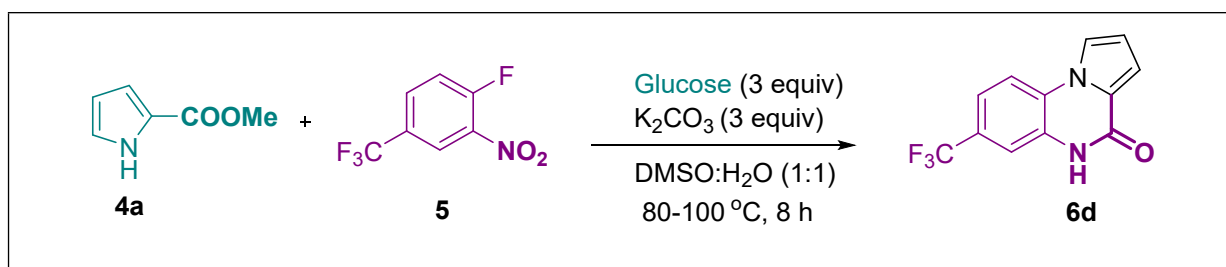

### C) Reaction Stage

| i)   | Substrate                       | Mass (g)       | Mol. Wt.       | Mol      |
|------|---------------------------------|----------------|----------------|----------|
|      | 4a                              | 1.00           | 125            | 0.014    |
|      | 5                               | 1.83           | 209            | 0.016    |
| ii)  | Reagents                        | Mass (g)       | Mol. Wt.       | Mol      |
|      | Glucose                         | 4.32           | 180            | 0.042    |
|      | K <sub>2</sub> CO <sub>3</sub>  | 3.32           | 40             | 0.042    |
| iii) | Reaction Solvents               | Vol. (mL)      | Density (g/mL) | Mass (g) |
|      | DMSO                            | 8              | 1.1            | 8.8      |
|      | H <sub>2</sub> O                | 8              | 1.0            | 8        |
|      | Total solvents                  |                |                | 16.8     |
|      | <b>Total Reaction Materials</b> | <b>27.27 g</b> |                |          |

| <b>D) Work-up Stage (Filtration and Recrystallization)</b> |                                 |                  |                       |                 |
|------------------------------------------------------------|---------------------------------|------------------|-----------------------|-----------------|
|                                                            | <b>Materials</b>                | <b>Vol. (mL)</b> | <b>Density (g/mL)</b> | <b>Mass (g)</b> |
|                                                            | H <sub>2</sub> O                | 15               | 1.0                   | 15              |
|                                                            | AcOEt                           | 15               | 0.902                 | 13.5            |
|                                                            | Cyclohexane                     | 10               | 0.779                 | 7.79            |
|                                                            | <b>Total Workup Materials</b>   | <b>36.29 g</b>   |                       |                 |
|                                                            | <b>Total Input Materials</b>    | <b>63.56 g</b>   |                       |                 |
|                                                            | <b>Output Target Product</b>    | <b>Mass (g)</b>  | <b>Mol. Wt.</b>       |                 |
|                                                            | <b>6d</b>                       | <b>2.0</b>       | 184                   |                 |
| <b>Green Metrics Analysis</b>                              |                                 |                  |                       |                 |
|                                                            | <b>Yield (%)</b>                | <b>90</b>        |                       |                 |
|                                                            | <b>Conversion (%)</b>           | <b>100</b>       |                       |                 |
|                                                            | <b>AE (%)</b>                   | <b>75.44</b>     |                       |                 |
|                                                            | <b>RME (%)</b>                  | <b>70.7</b>      |                       |                 |
|                                                            | <b>PMI<sub>[Reaction]</sub></b> | <b>13.6</b>      |                       |                 |
|                                                            | <b>PMI<sub>[Workup]</sub></b>   | <b>18.1</b>      |                       |                 |
|                                                            | <b>PMI<sub>[Total]</sub></b>    | <b>31.7</b>      |                       |                 |

The PMI, AE, E-Factors, and reaction mass efficiency (RME) were also calculated for other KSMs prepared using the developed protocol, as shown below.

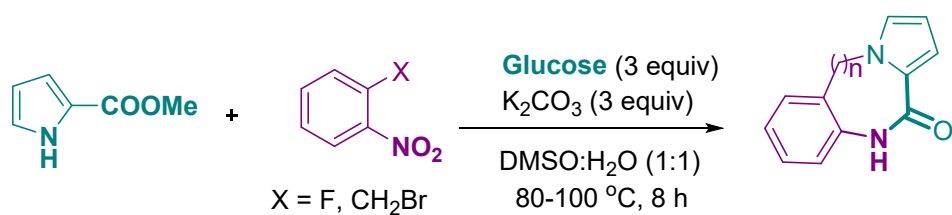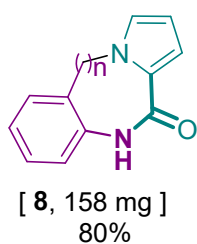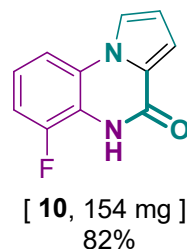

| Compounds | AE (%) | PMI <sub>[Reaction]</sub> | PMI <sub>[Workup]</sub> | PMI <sub>[Total]</sub> | E-Factor |
|-----------|--------|---------------------------|-------------------------|------------------------|----------|
| <b>8</b>  | 58     | 10.0                      | 29.0                    | 39.0                   | 9        |
| <b>10</b> | 67     | 9.8                       | 21.8                    | 39.6                   | 8.8      |

## 4. CHARACTERIZATION DATA

### *Pyrrolo[1,2-a]quinoxaline (3a)*<sup>3</sup>

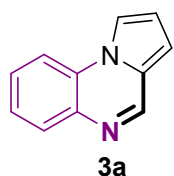

Yellow solid (151 mg, 90%); <sup>1</sup>H NMR (600 MHz, CDCl<sub>3</sub>) δ 8.79 (s, 1H), 7.95 (d, *J* = 8.0 Hz, 1H), 7.89 (s, 1H), 7.82 (d, *J* = 7.4 Hz, 1H), 7.51 – 7.47 (m, 1H), 7.45 – 7.41 (m, 1H), 6.88 (dd, *J* = 11.9, 2.1 Hz, 2H). <sup>13</sup>C NMR (151 MHz, CDCl<sub>3</sub>) δ 145.8, 135.8, 130.1, 128.0, 127.9, 126.5, 125.2, 114.2, 114.3, 107.4.

### *7-Bromo Pyrrolo[1,2-a]quinoxaline (3b)*<sup>5</sup>

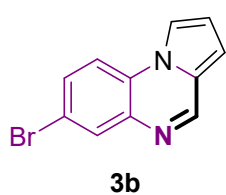

Yellow solid (215 mg, 88%); <sup>1</sup>H NMR (600 MHz, CDCl<sub>3</sub>) δ 8.79 (s, 1H), 8.10 (d, *J* = 2.2 Hz, 1H), 7.93 – 7.86 (m, 1H), 7.73 (d, *J* = 8.7 Hz, 1H), 7.60 (dd, *J* = 8.7, 2.2 Hz, 1H), 6.92 (dd, *J* = 3.9, 1.1 Hz, 1H), 6.89 (dd, *J* = 3.9, 2.7 Hz, 1H). <sup>13</sup>C NMR (151 MHz, CDCl<sub>3</sub>) δ 147.2, 137.5, 133.0, 131.0, 127.5, 126.8, 118.2, 115.7, 114.9, 108.5, 77.7, 77.5, 77.2.

### *7-(Trifluoromethyl)-Pyrrolo[1,2-a]quinoxaline (3c)*<sup>3</sup>

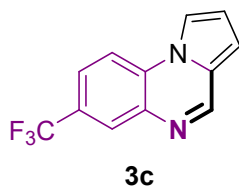

Yellow solid (212 mg, 90%); <sup>1</sup>H NMR (600 MHz, CDCl<sub>3</sub>) δ 8.85 (s, 1H), 8.23 (s, 1H), 7.99 – 7.92 (m, 2H), 7.74 (dd, *J* = 8.6, 1.7 Hz, 1H), 6.97 (dd, *J* = 3.9, 1.1 Hz, 1H), 6.94 (dd, *J* = 3.9, 2.7 Hz, 1H). <sup>13</sup>C NMR (151 MHz, CDCl<sub>3</sub>) δ 147.1, 135.6, 130.2, 127.7, 126.6, 124.2 115.0 (d, *2J*<sub>C-F</sub> = 14.4 Hz), 114.6, 108.5.

### *7-Methyl Pyrrolo[1,2-a]quinoxaline (3d)*<sup>3</sup>

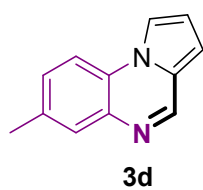

Yellow solid (163 mg, 90%); <sup>1</sup>H NMR (600 MHz, CDCl<sub>3</sub>) δ 8.76 (s, 1H), 7.86 (s, 1H), 7.75 (d, *J* = 7.6 Hz, 2H), 7.31 (d, *J* = 8.5 Hz, 1H), 6.86 (dd, *J* = 3.9, 1.2 Hz, 1H), 6.84 (dd, *J* = 3.9, 2.6 Hz, 1H), 2.47 (s, 3H). <sup>13</sup>C NMR (151 MHz, CDCl<sub>3</sub>) δ 145.8, 135.8, 135.0, 129.9, 128.9, 126.4, 125.9, 114.0, 113.8, 113.5, 107.1, 21.1.

### *7-Methoxy Pyrrolo[1,2-a]quinoxaline (3e)*<sup>3</sup>

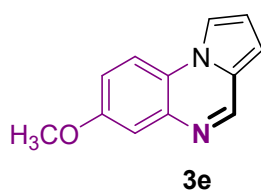

Orange solid (174 mg, 88%); <sup>1</sup>H NMR (600 MHz, CDCl<sub>3</sub>) δ 8.69 (s, 1H), 7.86 (d, *J* = 8.9 Hz, 1H), 7.80 (s, 1H), 7.23 (d, *J* = 1.4 Hz, 1H), 7.02 (ddd, *J* = 8.9, 2.7, 0.6 Hz, 1H), 6.87 – 6.84 (m, 2H), 3.94 (s, 3H). <sup>13</sup>C NMR (151 MHz, CDCl<sub>3</sub>) δ 159.3, 143.3, 131.3, 130.2, 128.8, 126.4, 114.1, 113.7, 112.8, 106.7, 97.6, 55.8.

### 8-Methyl Pyrrolo[1,2-a]quinoxaline (3f)<sup>3</sup>

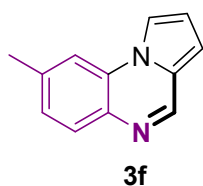

Yellow solid (163 mg, 90%); <sup>1</sup>H NMR (600 MHz, CDCl<sub>3</sub>) δ 8.73 (s, 1H), 7.85 (s, 1H), 7.81 (d, *J* = 8.2 Hz, 1H), 7.62 (s, 1H), 7.23 (d, *J* = 8.2 Hz, 1H), 6.87 – 6.79 (m, 2H), 2.52 (s, 3H). <sup>13</sup>C NMR (151 MHz, CDCl<sub>3</sub>) δ 144.8, 138.3, 133.8, 129.8, 127.8, 126.6, 126.5, 126.4, 113.8, 106.9, 21.8.

### 7,8-Dichloro Pyrrolo[1,2-a]quinoxaline (3g)<sup>3</sup>

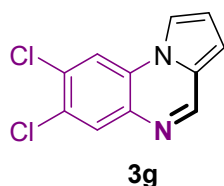

Light brown solid (46 mg, 80%); <sup>1</sup>H NMR (600 MHz, DMSO) δ 8.89 (s, 1H), 8.71 (s, 1H), 8.61 – 8.52 (m, 1H), 8.07 (s, 1H), 7.04 (dd, *J* = 4.0, 1.0 Hz, 1H), 6.96 (dd, *J* = 3.9, 2.8 Hz, 1H). <sup>13</sup>C NMR (151 MHz, CDCl<sub>3</sub>) δ 146.9, 135.3, 131.5, 131.1, 131.0, 128.9, 127.2, 126.3, 115.5, 115.0, 108.6.

### 8-Chloro-7-methyl Pyrrolo[1,2-a]quinoxaline (3h)<sup>3</sup>

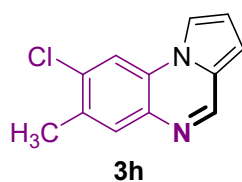

Brown solid (192 mg, 89%); <sup>1</sup>H NMR (600 MHz, CDCl<sub>3</sub>) δ 8.73 (s, 1H), 7.80 (s, 1H), 7.79 (d, *J* = 1.1 Hz, 1H), 7.76 (s, 1H), 6.85 (dt, *J* = 3.8, 3.4 Hz, 2H), 2.47 (s, 3H). <sup>13</sup>C NMR (151 MHz, CDCl<sub>3</sub>) δ 145.8, 134.5, 133.6, 133.2, 131.5, 126.7, 126.2, 114.3, 114.2, 107.7, 19.9. HRMS (ESI) *m/z* calcd for C<sub>12</sub>H<sub>9</sub>ClN<sub>2</sub> [M+H]<sup>+</sup> 217.0532 found 217.0543.

### 9-Fluoro-Pyrrolo[1,2-a]quinoxaline (3i)<sup>7</sup>

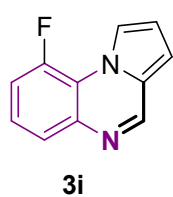

Yellow solid (164 mg, 88%); <sup>1</sup>H NMR (600 MHz, CDCl<sub>3</sub>) δ 8.83 (s, 1H), 7.94 – 7.90 (m, 1H), 7.64 (d, *J* = 8.3 Hz, 1H), 7.46 (td, *J* = 8.3, 5.5 Hz, 1H), 7.22 – 7.13 (m, 1H), 6.96 (dd, *J* = 4.0, 1.0 Hz, 1H), 6.91 (dd, *J* = 3.9, 2.8 Hz, 1H). NMR (151 MHz, CDCl<sub>3</sub>) δ 145.83 (s), 127.79 (s), 125.10 (s), 114.7 (d, *2J*<sub>C-F</sub> = 25.8 Hz), 111.2 (d, *2J*<sub>C-F</sub> = 20.1 Hz), 109.5, 108.3. <sup>19</sup>F NMR:(565 MHz, CDCl<sub>3</sub>) δ -121.60.

### 7-(Methyl sulfonyl) Pyrrolo[1,2-a]quinoxaline (3j)

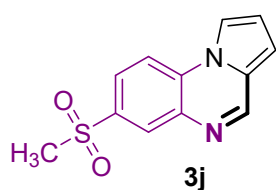

Orange solid (172 mg, 70%); <sup>1</sup>H NMR (600 MHz, CDCl<sub>3</sub>) δ 8.96 (s, 1H), 8.56 (d, *J* = 2.4 Hz, 1H), 8.51 (d, *J* = 8.7 Hz, 1H), 8.31 (d, *J* = 2.0 Hz, 1H), 8.05 (dd, *J* = 8.6, 2.1 Hz, 1H), 7.08 (dd, *J* = 3.9, 0.8 Hz, 1H), 7.00 (dd, *J* = 3.8, 2.8 Hz, 1H), 3.30 (s, 1H). <sup>13</sup>C NMR (151 MHz,

CDCl<sub>3</sub>)  $\delta$  148.0, 137.6, 135.4, 131.3, 128.9, 126.4, 126.2, 117.7, 116.7, 115.7, 109.4, 44.1.  
HRMS (ESI)  $m/z$  calcd for C<sub>11</sub>H<sub>9</sub>N<sub>2</sub>O<sub>2</sub>S [M+H]<sup>+</sup> 234.0463 found 234.0459.

**Pyrido[3,2-*e*]Pyrrolo[1,2-*a*]Pyrazine (3k)<sup>3</sup>**

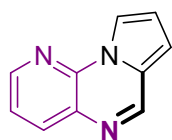

**3k**

Yellow solid (149 mg, 88%); <sup>1</sup>H NMR (600 MHz, CDCl<sub>3</sub>)  $\delta$  8.78 (s, 1H), 8.52 (dd,  $J$  = 4.6, 1.4 Hz, 1H), 8.37 – 8.36 (m, 1H), 8.22 (dd,  $J$  = 8.0, 1.6 Hz, 1H), 7.42 (dd,  $J$  = 8.0, 4.7 Hz, 1H), 6.96 (dd,  $J$  = 3.9, 1.2 Hz, 1H), 6.90 (dd,  $J$  = 3.8, 2.8 Hz, 1H). <sup>13</sup>C NMR (151 MHz, CDCl<sub>3</sub>)  $\delta$  147.0, 146.6, 140.0, 137.5, 130.8, 128.0, 121.5, 115.6, 114.6, 108.9.

**8-BromoPyrido[3,2-*e*]Pyrrolo[1,2-*a*]Pyrazine (3l)**

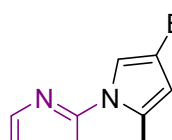

**3l**

Yellow solid (179 mg, 85%); <sup>1</sup>H NMR (600 MHz, CDCl<sub>3</sub>)  $\delta$  8.66 (dd,  $J$  = 8.4, 1.3 Hz, 1H), 7.83 – 7.77 (m, 2H), 7.64 – 7.57 (m, 1H), 7.54 – 7.46 (m, 1H), 6.81 (dd,  $J$  = 3.9, 2.8 Hz, 1H), 6.73 (dd,  $J$  = 3.9, 1.2 Hz, 1H), 2.75 (s, 3H). <sup>13</sup>C NMR (151 MHz, CDCl<sub>3</sub>)  $\delta$  138.6, 131.0, 129.6, 128.2, 126.1, 125.6, 121.6, 114.9, 114.0, 106.8, 77.3, 77.1, 76.9, 14.2. HRMS (ESI)  $m/z$  calcd for C<sub>13</sub>H<sub>10</sub>N<sub>2</sub>O [M+1]<sup>+</sup> 247.9823 found 247.9820, [M+2]<sup>+</sup> 249.9803 found 249.9802.

**Imidazo[1,2-*a*]quinoxaline (3n)<sup>3</sup>**

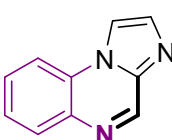

**3n**

White solid (139 mg, 82%); <sup>1</sup>H NMR (600 MHz, CDCl<sub>3</sub>)  $\delta$  9.10 (s, 1H), 8.12 (dd,  $J$  = 7.1, 0.9 Hz, 2H), 7.90 (dd,  $J$  = 8.2, 1.1 Hz, 1H), 7.80 (d,  $J$  = 1.1 Hz, 1H), 7.68 – 7.64 (m, 1H), 7.59 (ddd,  $J$  = 8.3, 7.3, 1.3 Hz, 1H). <sup>13</sup>C NMR (151 MHz, CDCl<sub>3</sub>)  $\delta$  144.3, 138.9, 135.9, 134.5, 130.8, 129.1, 127.4, 126.6, 114.9, 112.3.

**Indolo[1,2-*a*]quinoxaline (3o)<sup>3</sup>**

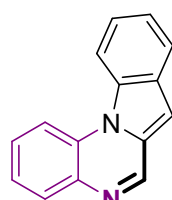

**3o**

White solid (153 mg, 70%); <sup>1</sup>H NMR (600 MHz, CDCl<sub>3</sub>)  $\delta$  8.94 (s, 1H), 8.44 (ddd,  $J$  = 15.9, 8.5, 0.9 Hz, 2H), 8.01 – 7.94 (m, 2H), 7.61 (ddd,  $J$  = 8.6, 7.3, 1.6 Hz, 1H), 7.55 (ddd,  $J$  = 8.6, 7.0, 1.3 Hz, 1H), 7.47 – 7.41 (m, 2H), 7.15 (s, 1H). <sup>13</sup>C NMR (151 MHz, CDCl<sub>3</sub>)  $\delta$  147.8, 135.8, 130.3, 129.0, 128.6, 124.2, 124.0, 122.7, 122.5, 114.7, 114.8, 100.7.



***Pyrrolo[1,2-a]quinoxaline-4(5H)-one (6a)***<sup>6</sup>

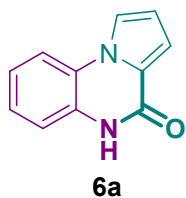

White solid (36 mg, 90%); <sup>1</sup>H NMR (600 MHz, DMSO-d<sub>6</sub>) δ 11.20 (s, 1H), 8.14 (s, 1H), 8.00 (d, *J* = 8.1 Hz, 1H), 7.28 – 7.22 (m, 2H), 7.18 – 7.14 (m, 1H), 6.99 (dd, *J* = 3.8, 1.4 Hz, 1H), 6.65 – 6.64 (m, 1H). <sup>13</sup>C NMR (151 MHz, DMSO-d<sub>6</sub>) δ 155.4, 128.9, 126.0, 123.7, 123.0, 123.0, 118.4, 116.9, 115.4, 113.1, 111.8.

***7-Chloro-Pyrrolo[1,2-a]quinoxaline-4(5H)-one (6b)***<sup>6</sup>

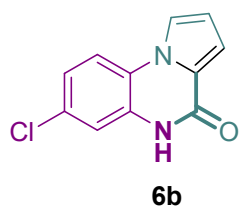

White solid (187 mg, 86%); <sup>1</sup>H NMR (600 MHz, DMSO-d<sub>6</sub>) δ 11.29 (s, 1H), 8.15 (dd, *J* = 2.8, 1.5 Hz, 1H), 8.04 (d, *J* = 8.7 Hz, 1H), 7.26 (d, *J* = 2.3 Hz, 1H), 7.22 (dd, *J* = 8.7, 2.3 Hz, 1H), 7.01 (dd, *J* = 3.8, 1.4 Hz, 1H), 6.66 (dd, *J* = 3.8, 2.8 Hz, 1H). <sup>13</sup>C NMR (151 MHz, DMSO-d<sub>6</sub>) δ 155.2, 130.3, 129.7, 123.3, 122.5, 122.1, 118.9, 117.1, 116.1, 113.4, 112.2.

***7,8-Dichloro-Pyrrolo[1,2-a]quinoxaline-4(5H)-one (6c)***<sup>7</sup>

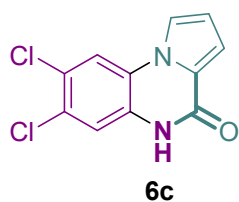

White solid (223 mg, 89%); <sup>1</sup>H NMR (600 MHz, DMSO-d<sub>6</sub>) δ 11.34 (s, 1H), 8.39 (s, 1H), 8.21 (dd, *J* = 2.8, 1.4 Hz, 1H), 7.02 (dd, *J* = 3.8, 1.4 Hz, 1H), 6.67 (dd, *J* = 3.8, 2.8 Hz, 1H). <sup>13</sup>C NMR (151 MHz, DMSO-d<sub>6</sub>) δ 155.0, 129.1, 127.6, 124.6, 123.4, 123.0, 119.5, 117.6, 117.3, 113.8, 112.7.

***7-(Trifluoromethyl)Pyrrolo[1,2-a]quinoxaline-4(5H)-one (6d)***<sup>6</sup>

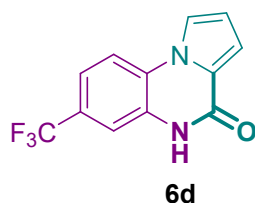

White solid (226 mg, 90%); <sup>1</sup>H NMR (600 MHz, DMSO-d<sub>6</sub>) δ 11.42 (s, 1H), 8.24 (dd, *J* = 18.2, 4.3 Hz, 2H), 7.56 (d, *J* = 4.6 Hz, 1H), 7.51 (dd, *J* = 14.0, 8.5 Hz, 1H), 7.07 (d, *J* = 3.8 Hz, 1H), 6.72 (dd, *J* = 6.9, 3.9 Hz, 1H). <sup>13</sup>C NMR (151 MHz, DMSO-d<sub>6</sub>) δ 150.6, 132.4, 130.5, 129.9, 128.9, 127.6, 126.6, 120.8, 120.0. <sup>19</sup>F NMR (565 MHz, DMSO) δ -56.84.

***2-Bromo-7-(Trifluoromethyl)Pyrrolo[1,2-a]quinoxaline-4(5H)-one (6f)***

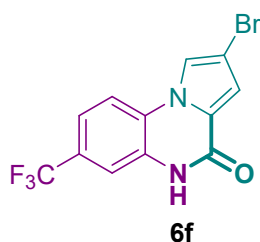

White solid (273 mg, 83%); <sup>1</sup>H NMR (600 MHz, DMSO-d<sub>6</sub>) δ 11.59 (d, *J* = 15.7 Hz, 1H), 8.45 (t, *J* = 16.8 Hz, 2H), 8.32 – 8.15 (m, 1H), 7.69 – 7.38 (m, 1H), 7.21 – 7.00 (m, 1H). <sup>13</sup>C NMR (151 MHz, DMSO-d<sub>6</sub>) δ 154.5, 129.7, 127.1, 126.9, 125.6, 125.3, 124.9, 123.8, 120.1, 119.5,

117.1, 114.3 (d,  $2J_{C-F} = 23.6$  Hz), 102.6. HRMS (ESI)  $m/z$  calcd for  $C_{12}H_6BrF_3N_2O$   $[M+1]^+$  330.9694 found 330.9690,  $[M+2]^+$  332.9673 found 332.9670.

**Pyrido[3,2-*e*]pyrrolo[1,2-*a*]pyrazin-6(5*H*)-one (6g)**

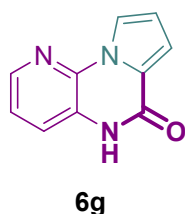

White solid (162 mg, 88%);  $^1H$  NMR (600 MHz, DMSO- $d_6$ ) 11.14 (s, 1H), 7.95 (dd,  $J = 4.6, 1.2$  Hz, 1H), 7.86 (dd,  $J = 2.7, 1.6$  Hz, 1H), 7.42 (dd,  $J = 11.3, 10.2$  Hz, 1H), 7.12 (dd,  $J = 8.0, 4.7$  Hz, 1H), 6.87 (dd,  $J = 3.7, 1.5$  Hz, 1H), 6.63 – 6.34 (m, 1H).  $^{13}C$  NMR (151 MHz, DMSO- $d_6$ )  $\delta$  155.7, 142.5, 135.8, 125.3, 125.1, 124.8, 122.8, 118.3, 114.3, 113.8, 40.6, 40.5, 40.4. HRMS (ESI)  $m/z$  calcd for  $C_{10}H_7N_3O$   $[M+Na]^+$  208.0847 found 208.0843.

**Indolo[1,2-*a*]quinoxaline-4(5*H*)-one (6i)<sup>8</sup>**

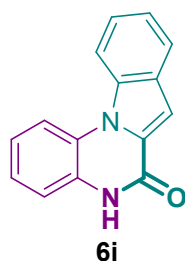

White solid (205 mg, 88%);  $^1H$  NMR (600 MHz, DMSO- $d_6$ )  $\delta$  11.55 (s, 1H), 8.46 (d,  $J = 8.6$  Hz, 1H), 8.42 (dd,  $J = 6.8, 2.6$  Hz, 1H), 7.86 (d,  $J = 7.9$  Hz, 1H), 7.48 – 7.44 (m, 1H), 7.41 (s, 1H), 7.31 (dt,  $J = 5.9, 5.4$  Hz, 2H), 7.22 (qt,  $J = 8.0, 3.9$  Hz, 2H). NMR (151 MHz, DMSO- $d_6$ )  $\delta$  156.0, 134.0, 128.8, 128.6, 128.4, 125.6, 125.1, 124.6, 123.4, 123.1, 122.5, 117.0, 115.7, 114.8, 105.6, 40.1, 40.0, 39.8, 39.7, 39.5, 39.4, 39.3.

**3-Bromo-indolo[1,2-*a*]quinoxaline-4(5*H*)-one (6j)<sup>8</sup>**

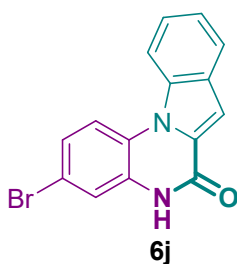

White solid (250 mg, 80%);  $^1H$  NMR (600 MHz, DMSO- $d_6$ )  $\delta$  11.83 (s, 1H), 8.44 (d,  $J = 8.6$  Hz, 1H), 8.39 (d,  $J = 8.8$  Hz, 1H), 7.91 (dd,  $J = 10.4, 4.4$  Hz, 1H), 7.54 – 7.49 (m, 1H), 7.48 (s, 1H), 7.46 (d,  $J = 2.3$  Hz, 1H), 7.40 – 7.34 (m, 1H). NMR (151 MHz, DMSO- $d_6$ )  $\delta$  157.4, 135.5, 131.6, 130.1, 129.9, 127.4, 127.1, 125.9, 124.7, 124.3, 120.4, 119.1, 117.5, 116.2, 107.7, 42.1, 41.6, 41.5, 41.3, 41.2, 41.1, 40.9, 40.8.

**3-(Trifluoromethyl)-indolo[1,2-*a*]quinoxaline-4(5*H*)-one (6k)<sup>8</sup>**

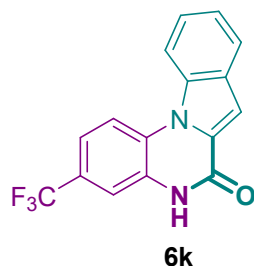

White solid (239 mg, 79%);  $^1H$  NMR (600 MHz, DMSO- $d_6$ )  $^1H$  NMR (600 MHz, )  $\delta$  11.72 (s, 1H), 8.60 (d,  $J = 8.6$  Hz, 1H), 8.47 (d,  $J = 8.6$  Hz, 1H), 7.91 (t,  $J = 8.4$  Hz, 1H), 7.59 (d,  $J = 1.8$  Hz, 2H), 7.56 – 7.52 (m, 1H), 7.50 (s, 1H), 7.38 (t,  $J = 7.5$  Hz, 1H).  $^{13}C$  NMR (151 MHz, DMSO- $d_6$ )  $\delta$  155.8, 134.2, 129.0, 128.8, 128.6, 127.8, 126.2, 123.3, 123.1, 119.8, 116.4, 114.8, 113.3, 106.9.

### 5,10-Dihydro-11H-benzo[e]pyrrolo[1,2-a][1,4]diazepin-11-one (8)<sup>9</sup>

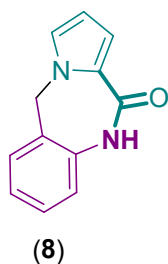

White solid (156 mg, 79%); <sup>1</sup>H NMR (600 MHz, DMSO-d<sub>6</sub>) δ 9.97 (s, 1H), 7.31 (dd, *J* = 7.5, 1.1 Hz, 1H), 7.25 – 7.21 (m, 1H), 7.10 (dt, *J* = 4.3, 2.1 Hz, 1H), 7.05 – 7.02 (m, 1H), 7.01 – 6.99 (m, 1H), 6.66 (dd, *J* = 3.8, 1.8 Hz, 1H), 6.03 (dd, *J* = 3.8, 2.5 Hz, 1H), 5.08 (s, 2H). <sup>13</sup>C NMR (600 MHz, DMSO-d<sub>6</sub>) δ 161.1, 138.8, 129., 129.3, 128.9, 126.9, 125.6, 124.6, 121.5, 116.7, 108.8, 50.4, 40.5, 40.4, 40.2, 40.1, 40.0, 39.8, 39.7.

### 6-Fluoro-Pyrrolo[1,2-a]quinoxaline-4(5H)-one (12)<sup>8</sup>

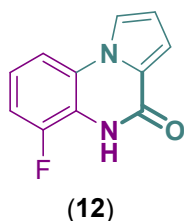

White solid (166 mg, 82%); <sup>1</sup>H NMR (600 MHz, DMSO-d<sub>6</sub>) δ 11.22 (s, 1H), 8.12 (dd, *J* = 2.7, 1.4 Hz, 1H), 7.81 (dd, *J* = 6.0, 3.2 Hz, 1H), 7.17 – 7.10 (m, 2H), 7.03 (dd, *J* = 3.8, 1.4 Hz, 1H), 6.64 (dd, *J* = 3.7, 2.9 Hz, 1H). NMR (151 MHz, DMSO-d<sub>6</sub>) δ 155.6, 151.4, 149.8, 125.1 (d, *J*<sub>C-F</sub> = 4.5 Hz), 124.0, 123.2 (d, *J*<sub>C-F</sub> = 8.0 Hz), 119.6, 118.6 (d, *J*<sub>C-F</sub> = 16.3 Hz), 114.0, 113.1, 112.5 (d, *J*<sub>C-F</sub> = 17.8 Hz), 111.8. <sup>19</sup>F NMR (565 MHz, DMSO) δ -124.68.

### 1-(2-nitrophenyl)-1H-pyrrole (2a)<sup>3</sup>

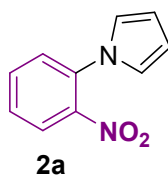

Brown oily liquid (166 mg, 98%); <sup>1</sup>H NMR (600 MHz, CDCl<sub>3</sub>-d<sub>6</sub>) δ 7.87 – 7.82 (m, 1H), 7.65 (td, *J* = 7.8, 1.5 Hz, 1H), 7.47 (ddd, *J* = 7.1, 3.9, 1.2 Hz, 2H), 6.83 – 6.76 (m, 2H), 6.38 – 6.32 (m, 2H). <sup>13</sup>C NMR (151 MHz, CDCl<sub>3</sub>-d<sub>6</sub>) δ 134.2, 134.2, 133.3, 127.9, 127.7, 125.0, 121.4, 111.1, 77.3, 77.1, 76.9.

### 2-(1H-pyrrol-1-yl)aniline (2a')<sup>3</sup>

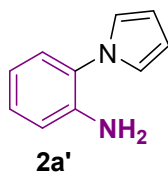

White solid (150 mg, 95%); <sup>1</sup>H NMR (600 MHz, CDCl<sub>3</sub>-d<sub>6</sub>) δ 7.21 – 7.10 (m, 1H), 6.85 (dd, *J* = 4.9, 2.8 Hz, 1H), 6.83 – 6.74 (m, 1H), 6.36 (t, *J* = 2.1 Hz, 1H), 3.67 (s, 2H). <sup>13</sup>C NMR (151 MHz, CDCl<sub>3</sub>-d<sub>6</sub>) δ 142.1, 128.6, 127.2, 121.8, 118.5, 116.2, 109.4.

### Methyl 1-(2-amino-4-chlorophenyl)-1H-pyrrole-2-carboxylate(6b')<sup>6</sup>

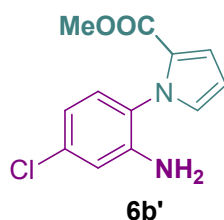

Yellow solid (150 mg, 92%); <sup>1</sup>H NMR (600 MHz, DMSO-d<sub>6</sub>) δ 7.06 (dd, *J* = 3.8, 1.6 Hz, 2H), 6.95 (d, *J* = 8.3 Hz, 1H), 6.84 (d, *J* = 2.3 Hz, 1H), 6.60 (dd, *J* = 8.3, 2.3 Hz, 1H), 6.37 (dd, *J* = 3.6, 2.9 Hz, 1H), 4.97 (s, 2H), 3.64 (s, 3H). <sup>13</sup>C NMR (151 MHz, DMSO-d<sub>6</sub>) δ 160.9, 147.5, 134.3, 131.4,

130.7, 125.8, 124.0, 119.4, 116.4, 115.5, 111.0, 52.2, 41.4, 41.3, 41.1, 41.0, 40.9, 40.7, 40.6, 40.5.

***Deuterated Pyrrolo[1,2-a]quinoxaline (3p)***

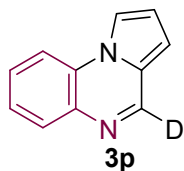

Yellow solid (109 mg, 65%);  $^1\text{H}$  NMR (600 MHz,  $\text{CDCl}_3$ )  $\delta$  8.82 (s), 7.96 (dd,  $J = 8.0, 1.4$  Hz), 7.94 (dd,  $J = 2.5, 1.1$  Hz), 7.87 (dd,  $J = 8.2, 1.0$  Hz), 7.53 (m), 7.45 (m), 6.91 (dd,  $J = 4.0, 1.1$  Hz), 6.89 (dd,  $J = 3.9, 2.7$  Hz).  $^1\text{H}$  NMR (151 MHz,  $\text{CDCl}_3$ )  $\delta$  145.9, 135.9, 130.2, 127.9, 125.3, 114.3, 114.1, 113.9, 107.4, 107.4. HRMS (ESI)  $m/z$  calcd for  $\text{C}_{11}\text{H}_7\text{N}_2\text{O}$   $[\text{M}+\text{H}]^+$  170.0829 found 170.0818.

## 5. References

1. (a) Z. An, L. Zhao, M. Wu, J. Ni, Z. Qi, G. Yu, R. Yan, *Chem. Commun.* **2017**, 53, 11572–11575. (b) J. Ni, Y. Jiang, Z. Qi, R. Yan, *Chem. Asian J.* **2019**, 14, 2898–2902.
2. F. R. C. Davila, F. Ramos-Morales, F. Delgado, J. Tamariz, *Beilstein J. Org. Chem.* **2020**, 16, 1320–1334.
3. (a) C. Xie, Z. Zhang, D. Li, J. Gong, X. Han, X. Liu, C. Ma, *J. Org. Chem.* **2017**, 82, 3491–3499. (b) J. T. Reeves, D. R. Fandrick, Z. Tan, J. J. Song, H. Lee, N. K. Yee, C. H. Senanayake, *J. Org. Chem.* **2010**, 75, 992–994.
4. F. Grande, F. Aiello, D. Francesca, O. Grazia, A. Brizzi, A. Garofalo, N. Neamati, *Bio. & Med. Chem.* **2007**, 15, 288–294.
5. S. Li, J. Ren, C. Ding, Y. Wang, C. Ma, *J. Org. Chem.* **2021**, 86, 16848–16857.
6. Y. Song, Z. Quan, Z. Chen, W. Xiao-Feng, *Org. Lett.* **2023**, 25, 3984–3988.
7. G. Campiani, E. Morelli, S. Gemma, V. Nacci, S. Butini, M. Hamon, E. Novellino, G. Greco, A. Cagnotto, M. Goegan, L. Cervo, F. Dalla Valle, C. Fracasso, S. Caccia, T. Mennini, *J. Med. Chem.* **1999**, 42, 4362–4379.
8. (a) Q. Gao, J. M. Lu, L. Yao, S. Wang, J. Ying, X. F. Wu, *Org. Lett.* **2021**, 23, 178–182. (b) A. Chandrasekhar, S. Sankararaman, *Org. Biomol. Chem.* **2020**, 18, 1612–1622.
9. M. Artico, G. Martinor, D. Giulianos, A. Massa, G. C. Porretta, *Chem. Comm.* **1969**, 671–675.

## 6. <sup>1</sup>H and <sup>13</sup>C Spectra

### 3a <sup>1</sup>H NMR (CDCl<sub>3</sub>)

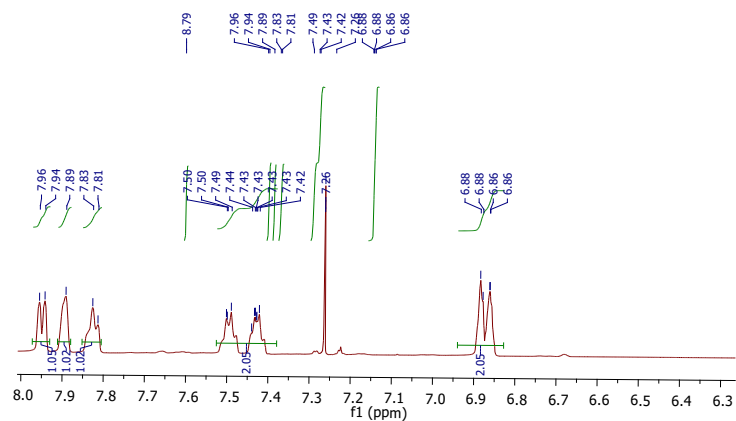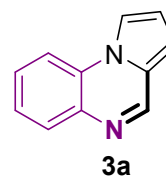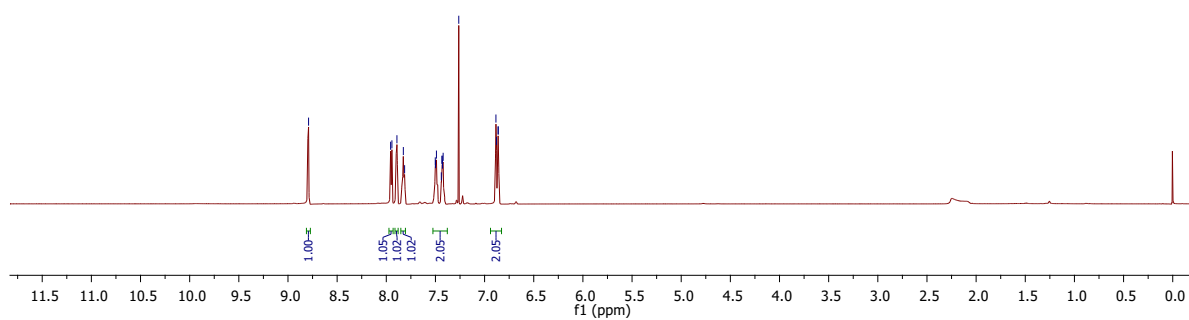

### <sup>13</sup>C NMR (CDCl<sub>3</sub>)

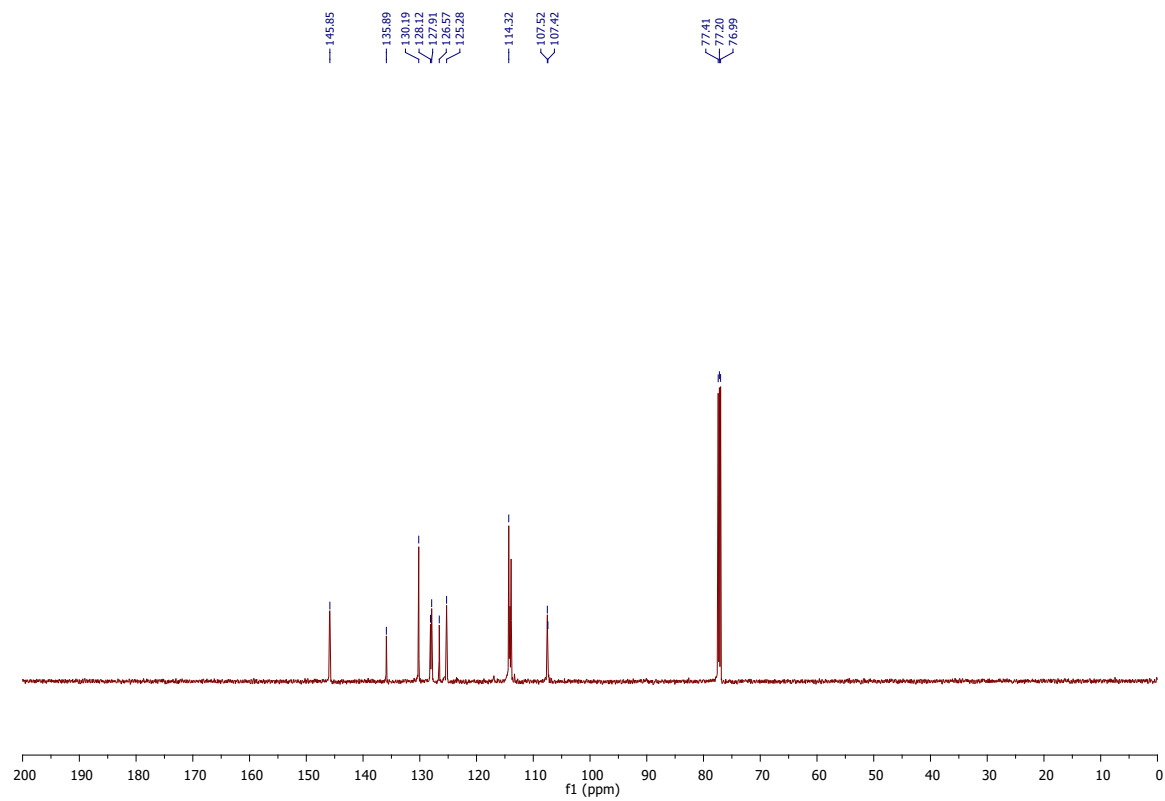

### 3b <sup>1</sup>H NMR (CDCl<sub>3</sub>)

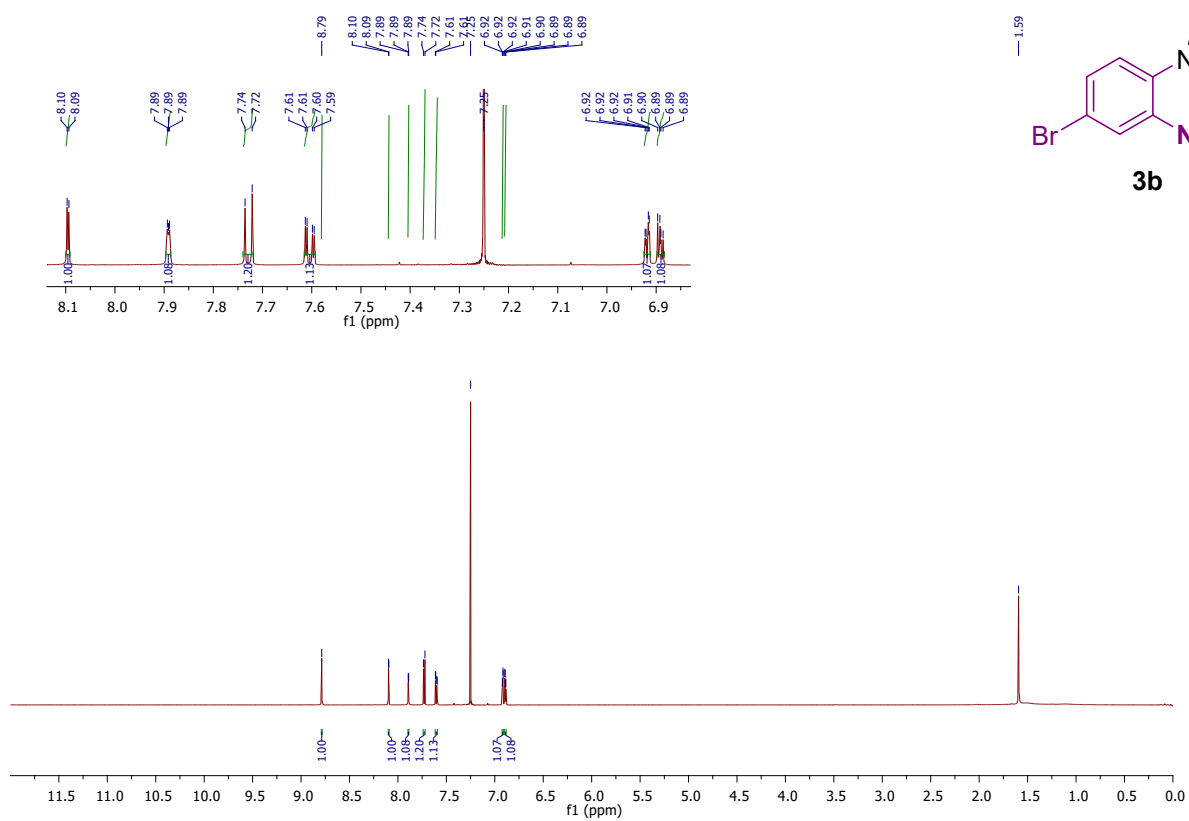

### <sup>13</sup>C NMR (CDCl<sub>3</sub>)

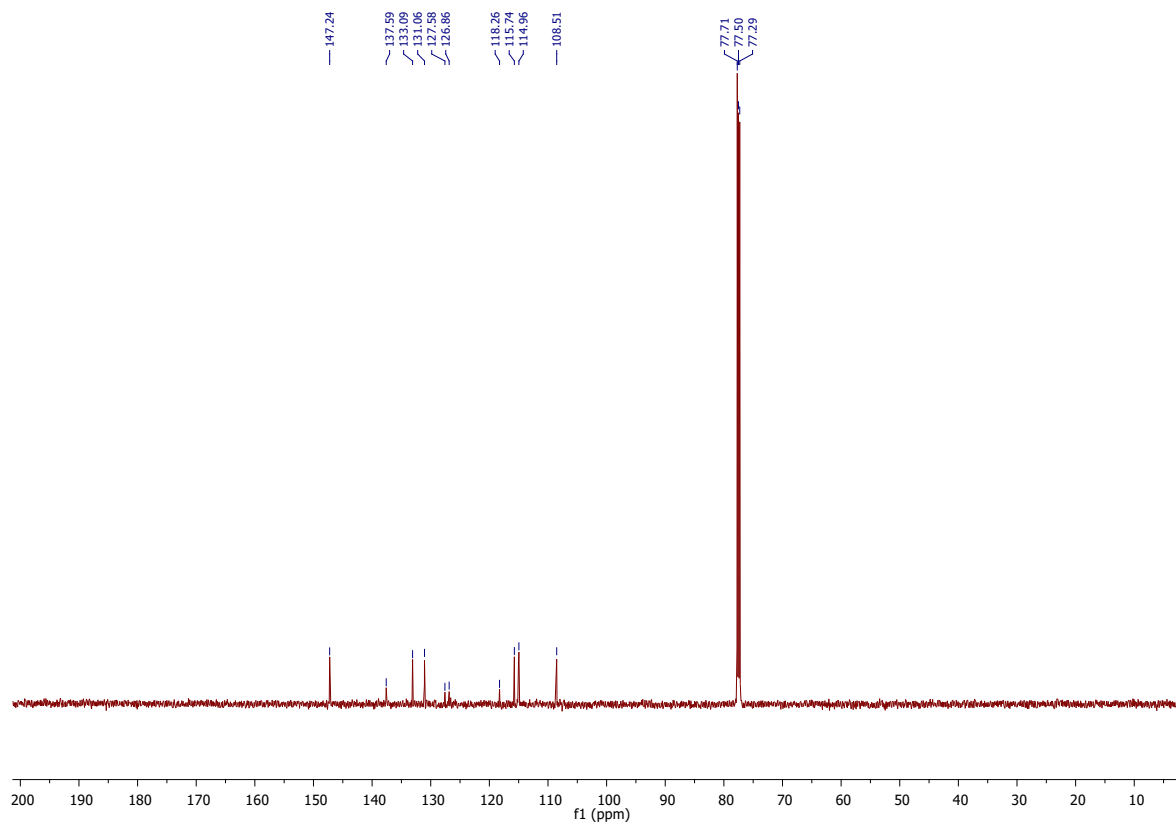

### 3c <sup>1</sup>H NMR (CDCl<sub>3</sub>)

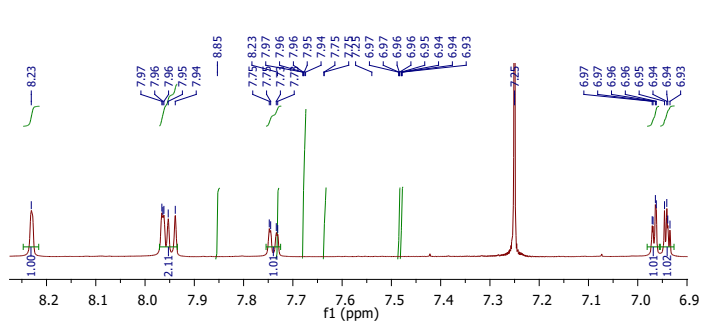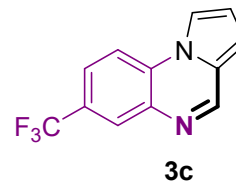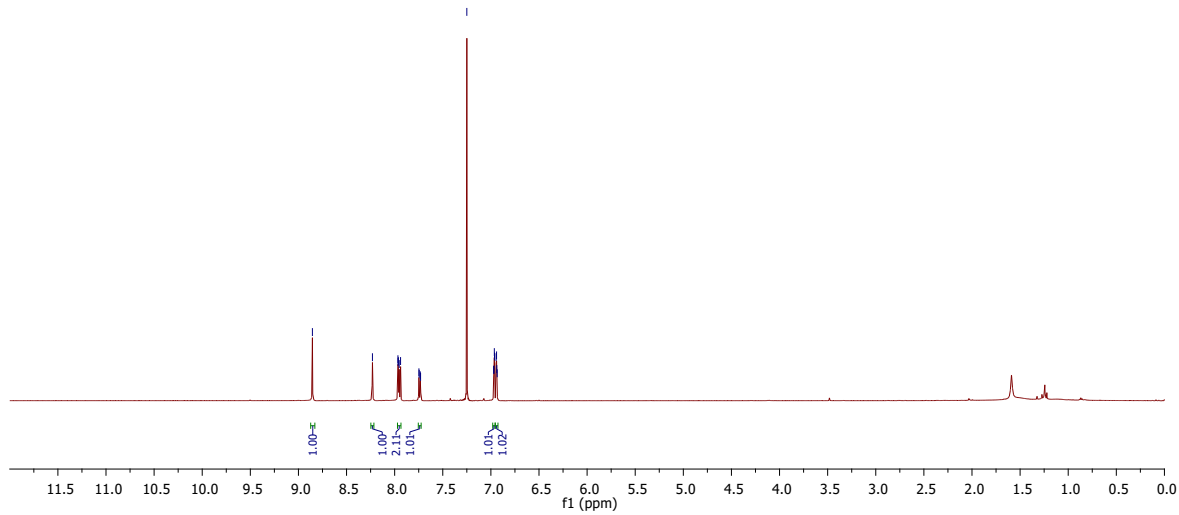

### <sup>13</sup>C NMR (CDCl<sub>3</sub>)

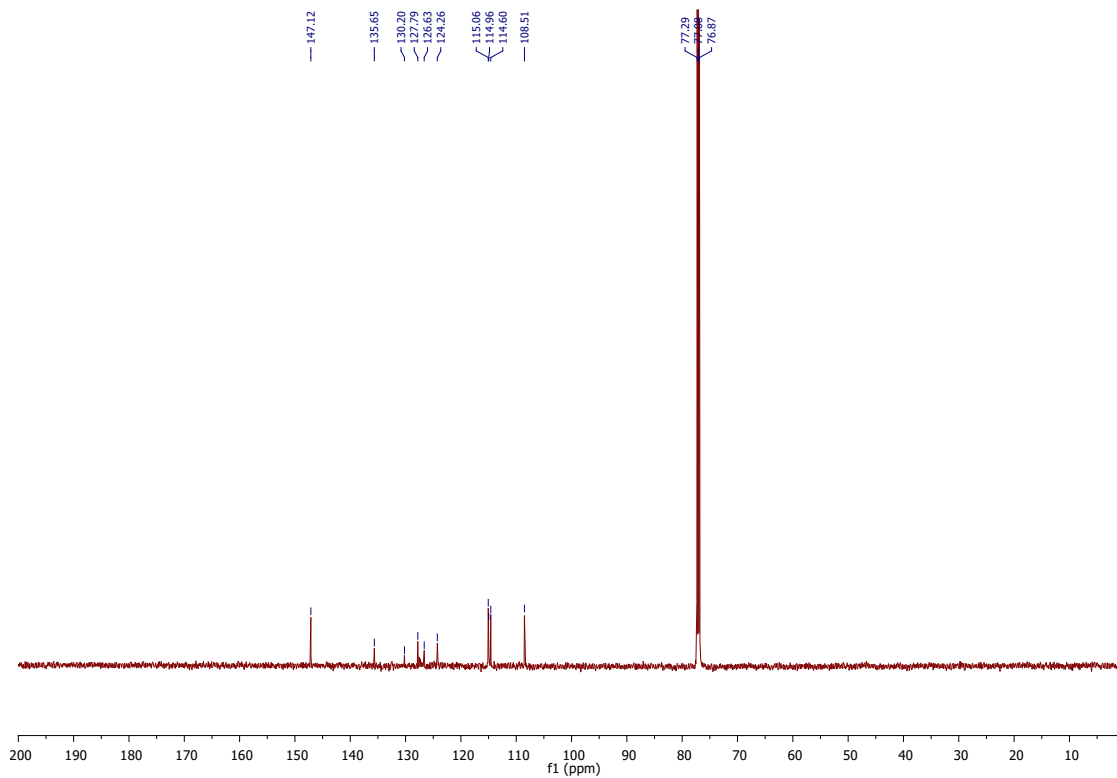



### 3d <sup>1</sup>H NMR (CDCl<sub>3</sub>)

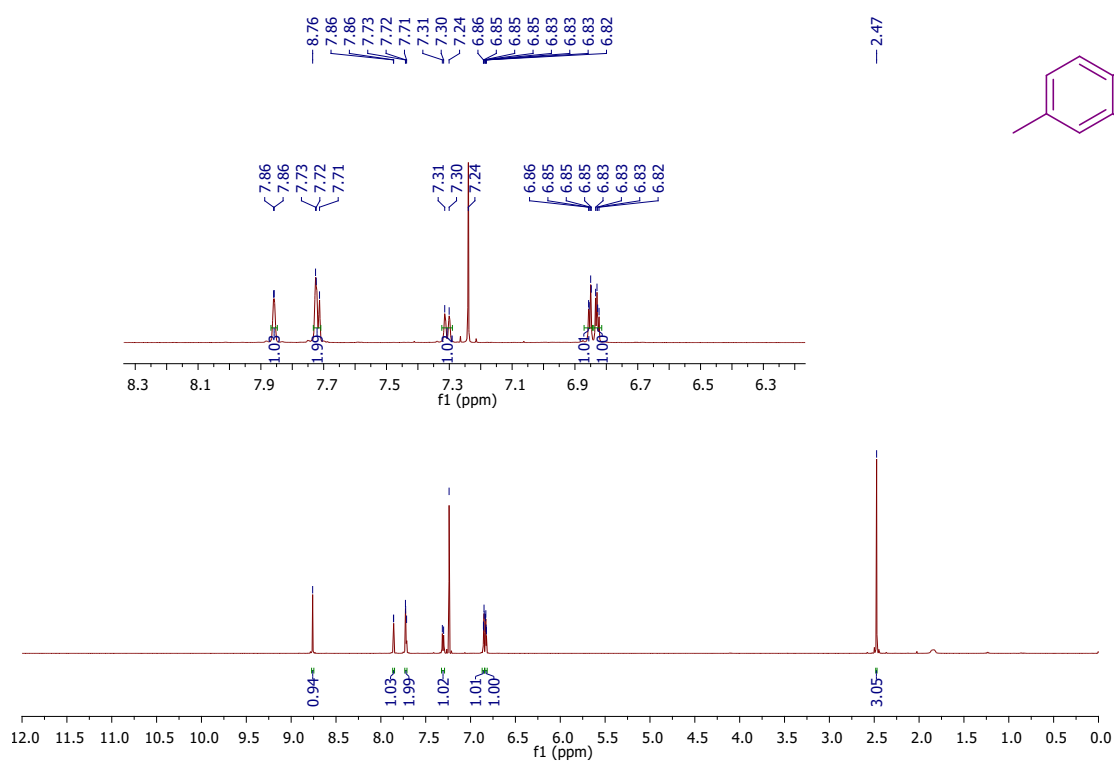

### <sup>13</sup>C NMR (CDCl<sub>3</sub>)

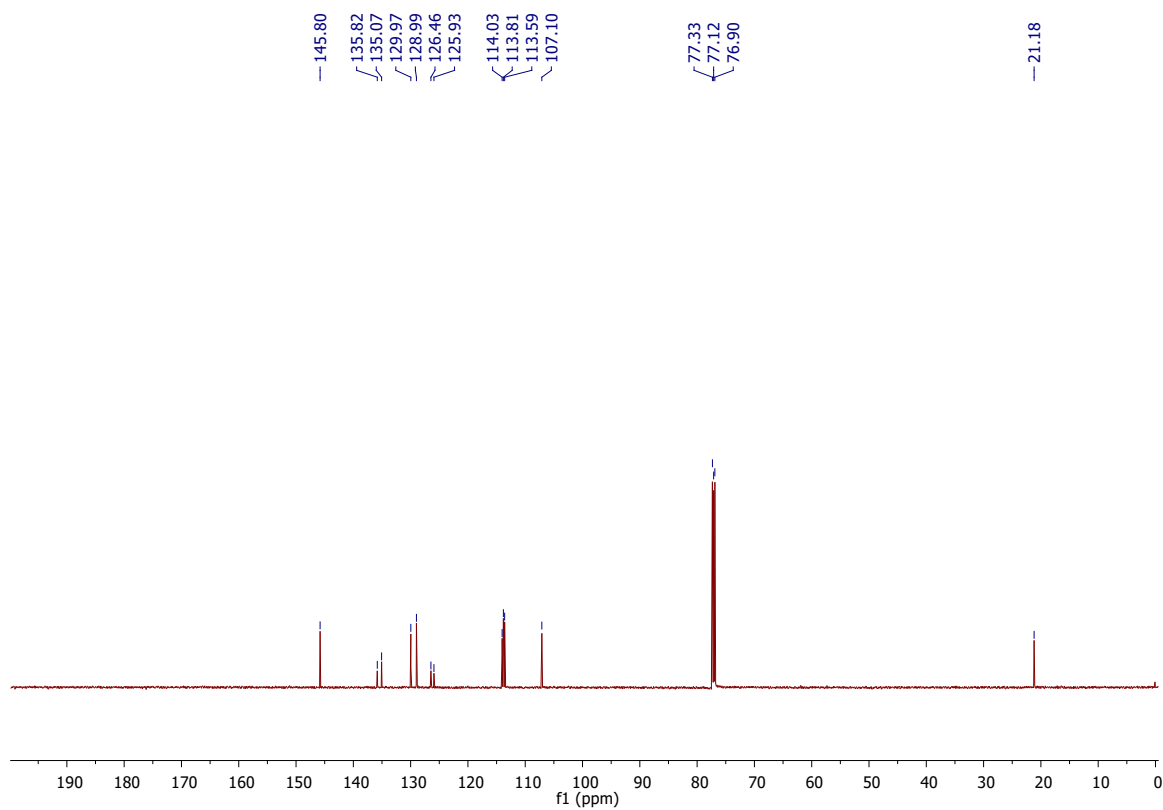

### 3e <sup>1</sup>H NMR (CDCl<sub>3</sub>)

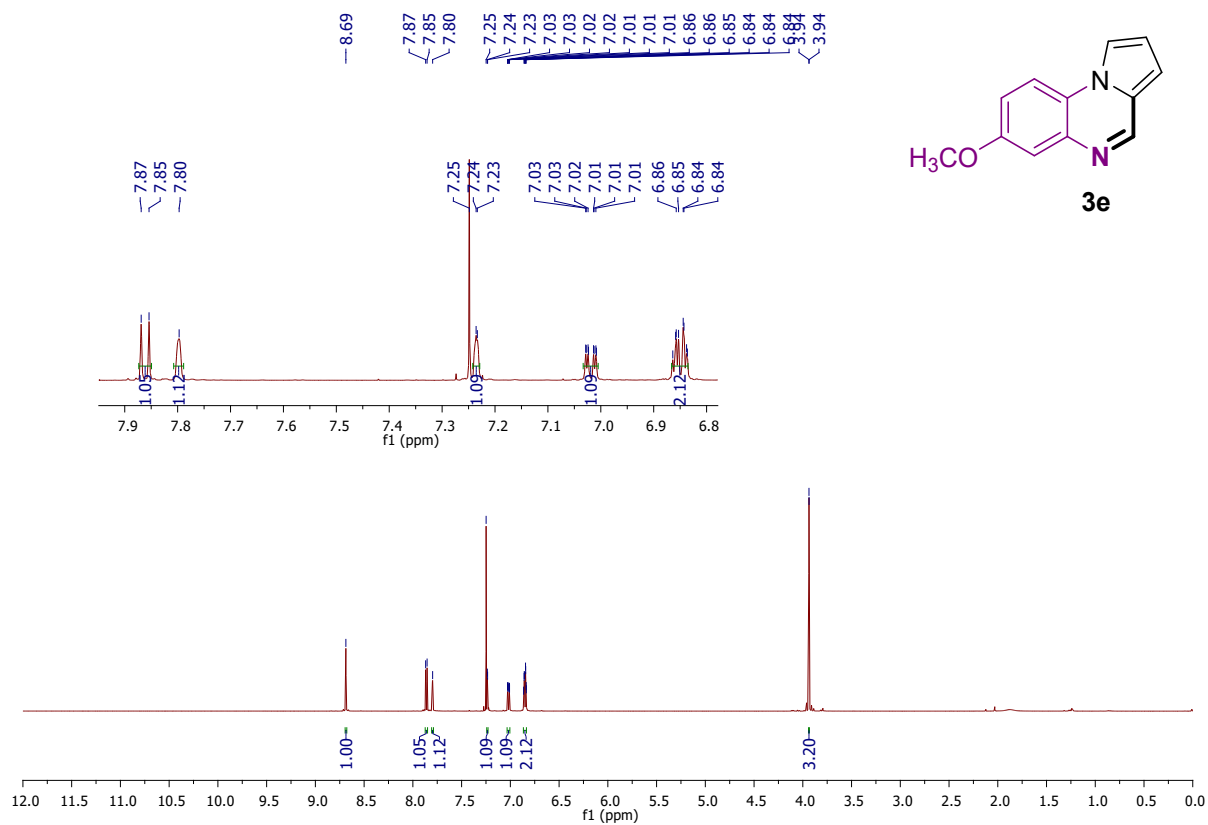

### <sup>13</sup>C NMR (CDCl<sub>3</sub>)

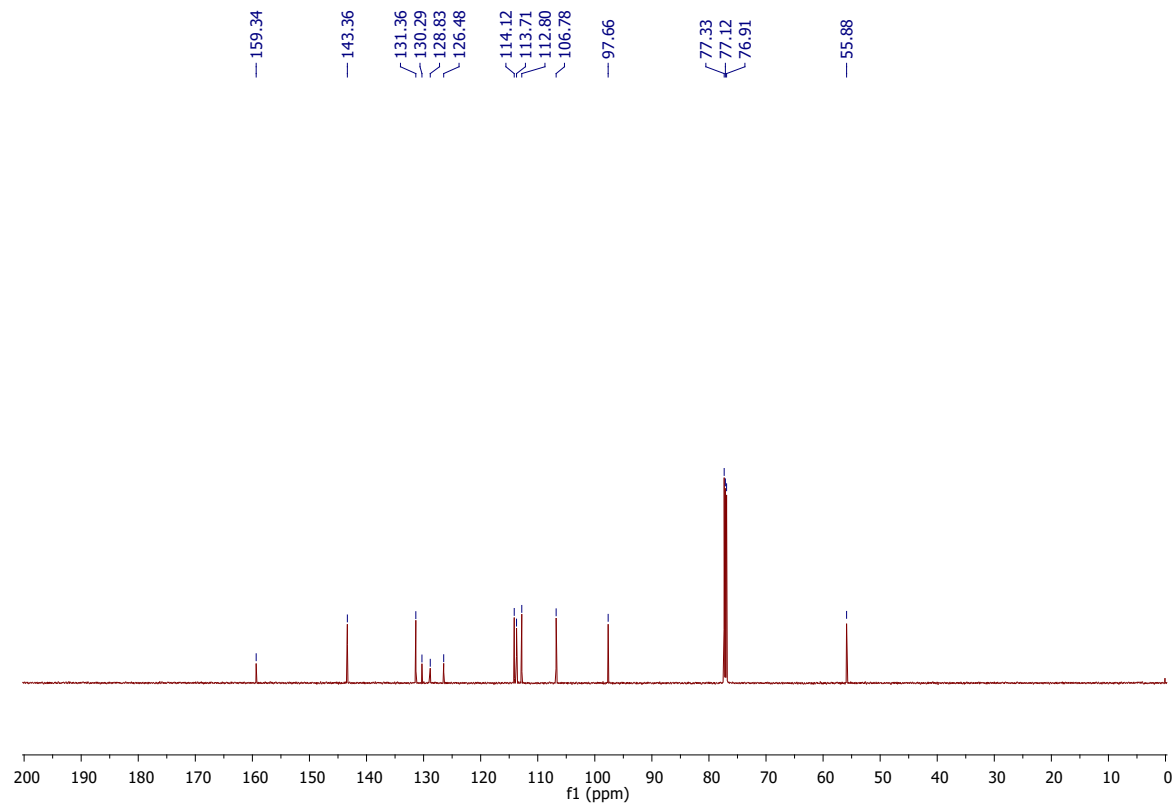

### **3f** $^1\text{H}$ NMR ( $\text{CDCl}_3$ )

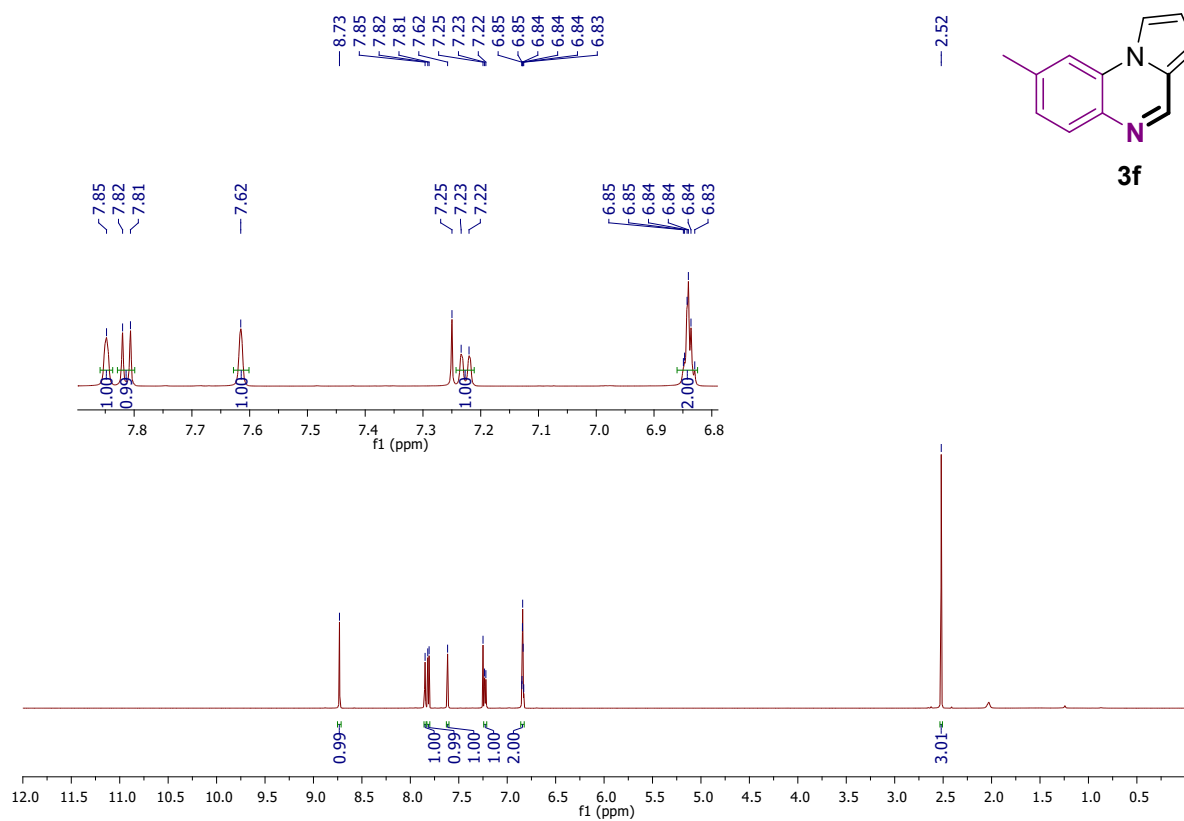

### $^{13}\text{C}$ NMR ( $\text{CDCl}_3$ )

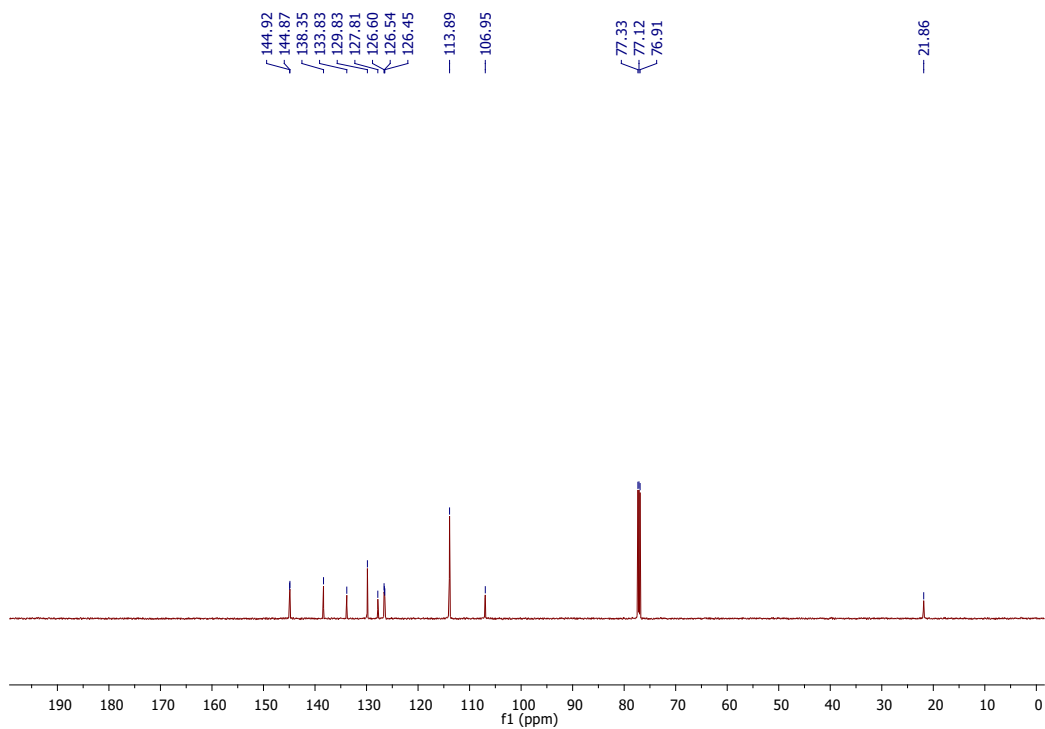

### 3g <sup>1</sup>H NMR (DMSO)

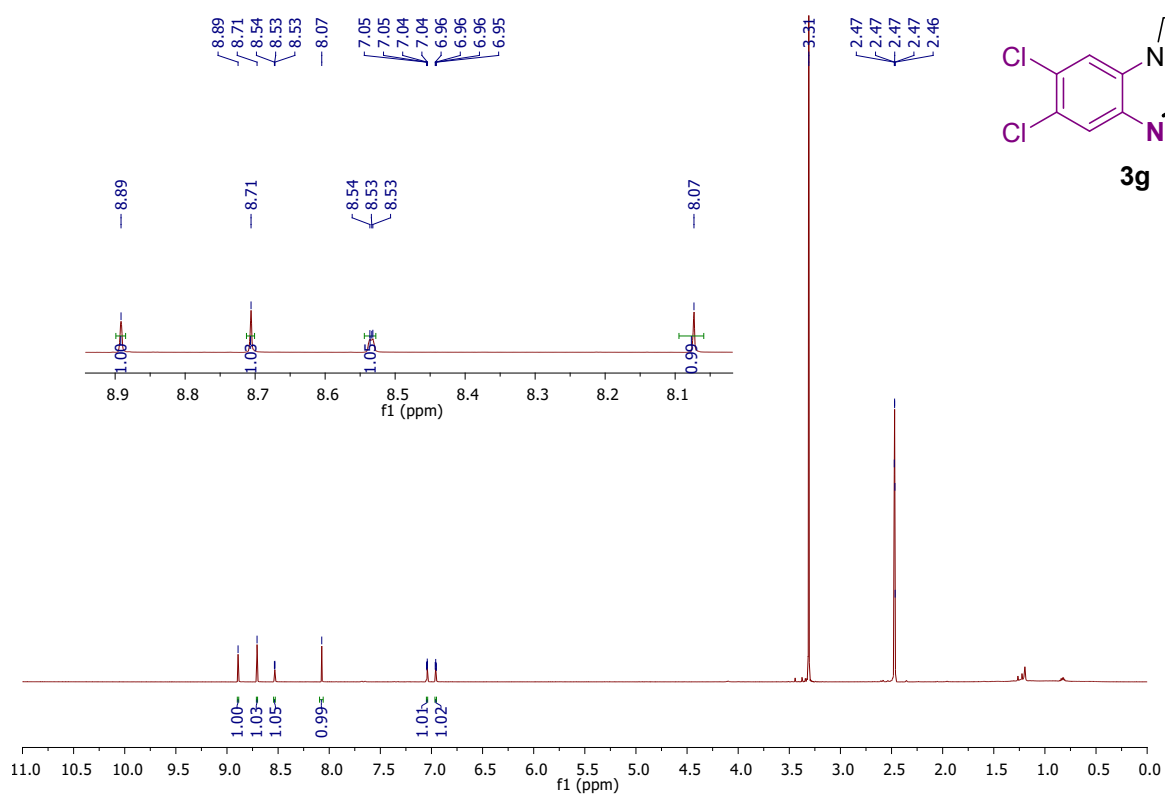

### <sup>13</sup>C NMR (CDCl<sub>3</sub>)

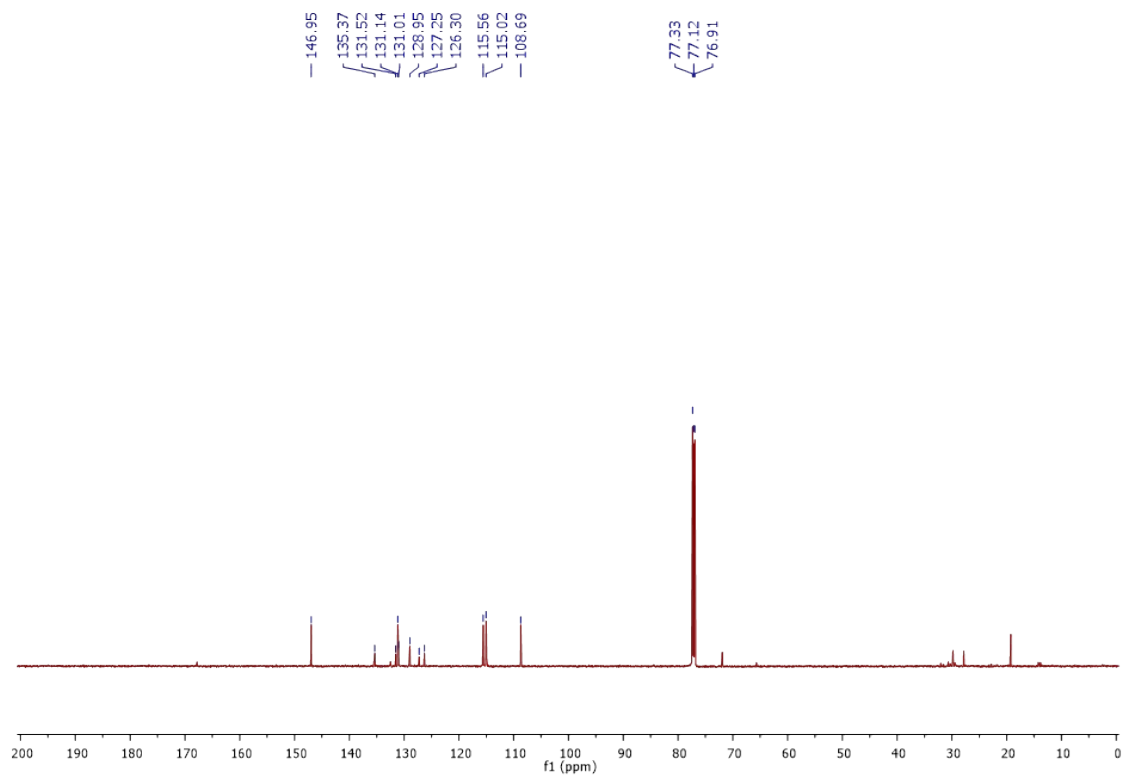

**3h**  $^1\text{H}$  NMR ( $\text{CDCl}_3$ )

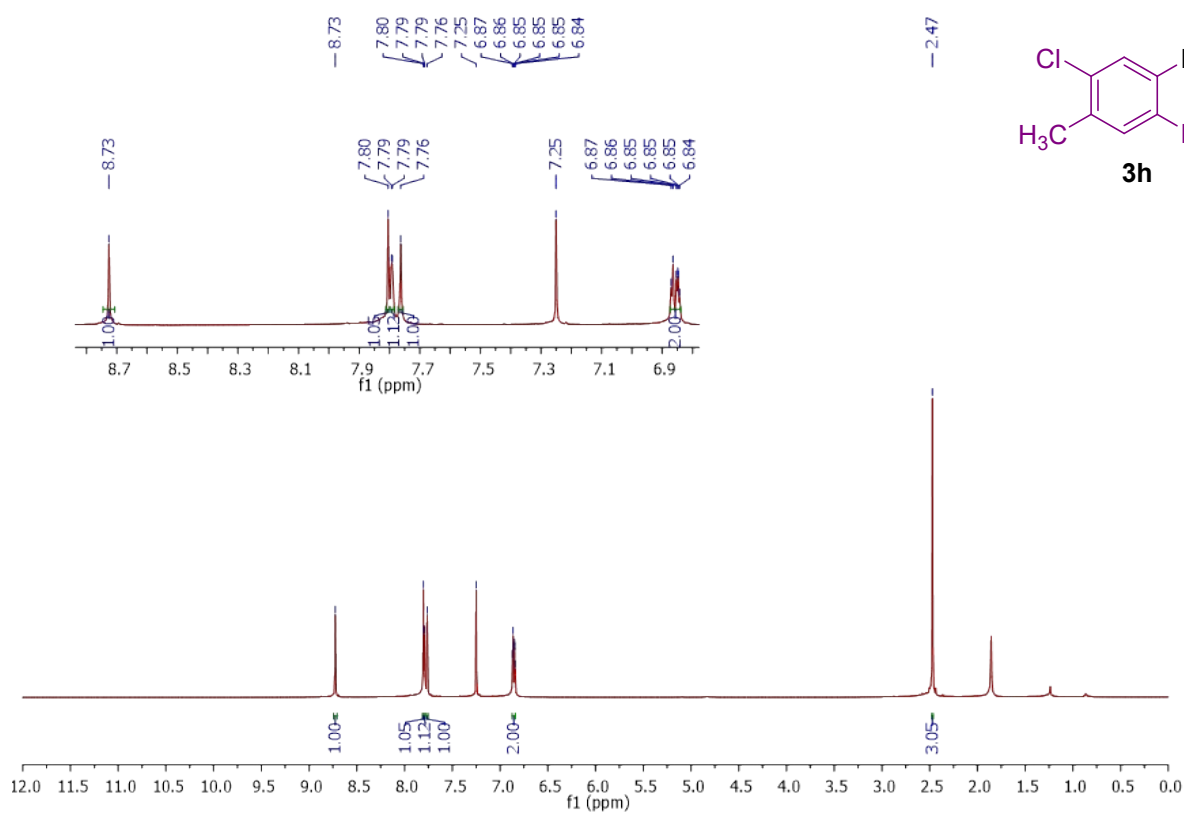

$^{13}\text{C}$  NMR ( $\text{CDCl}_3$ )

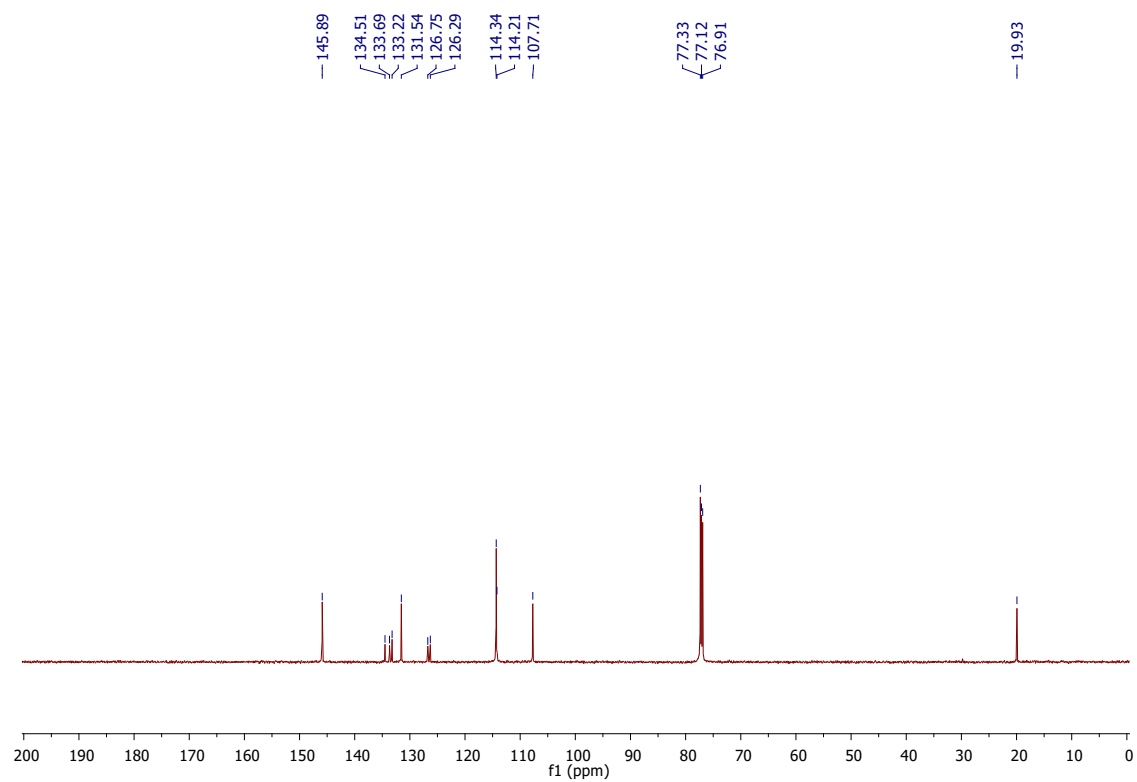

### 3i <sup>1</sup>H NMR (CDCl<sub>3</sub>)

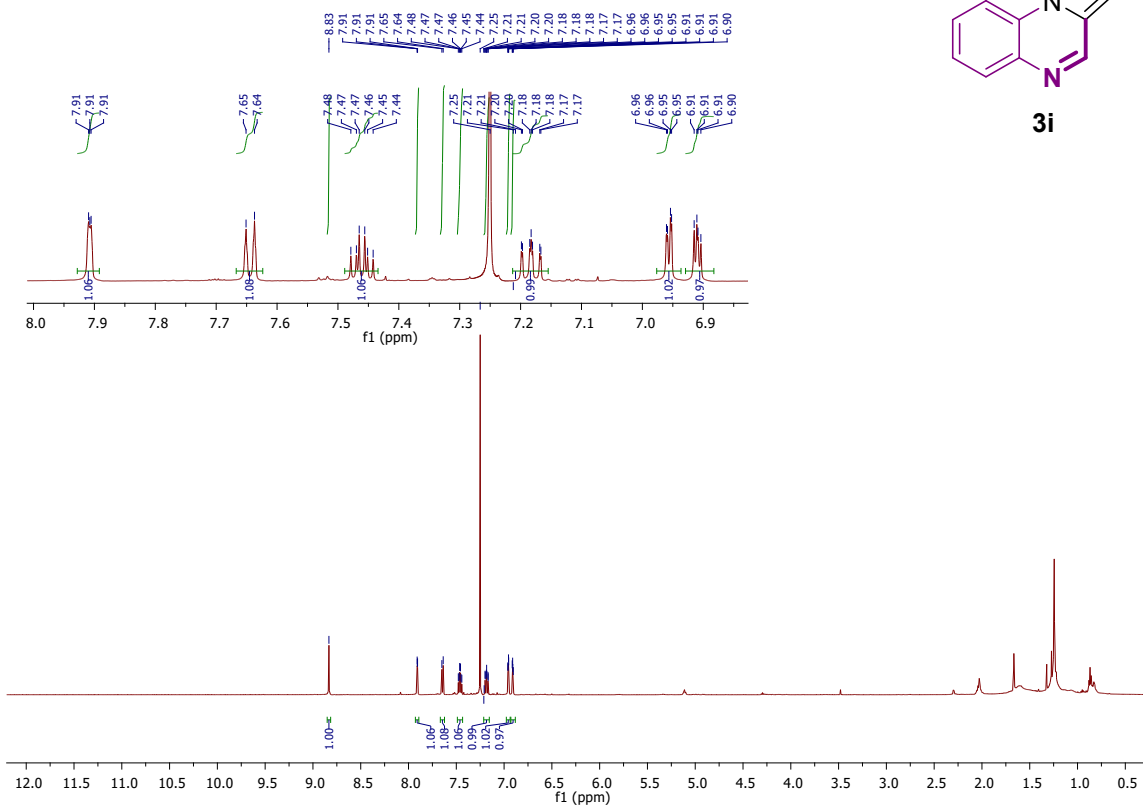

### 3i <sup>13</sup>C NMR (CDCl<sub>3</sub>)

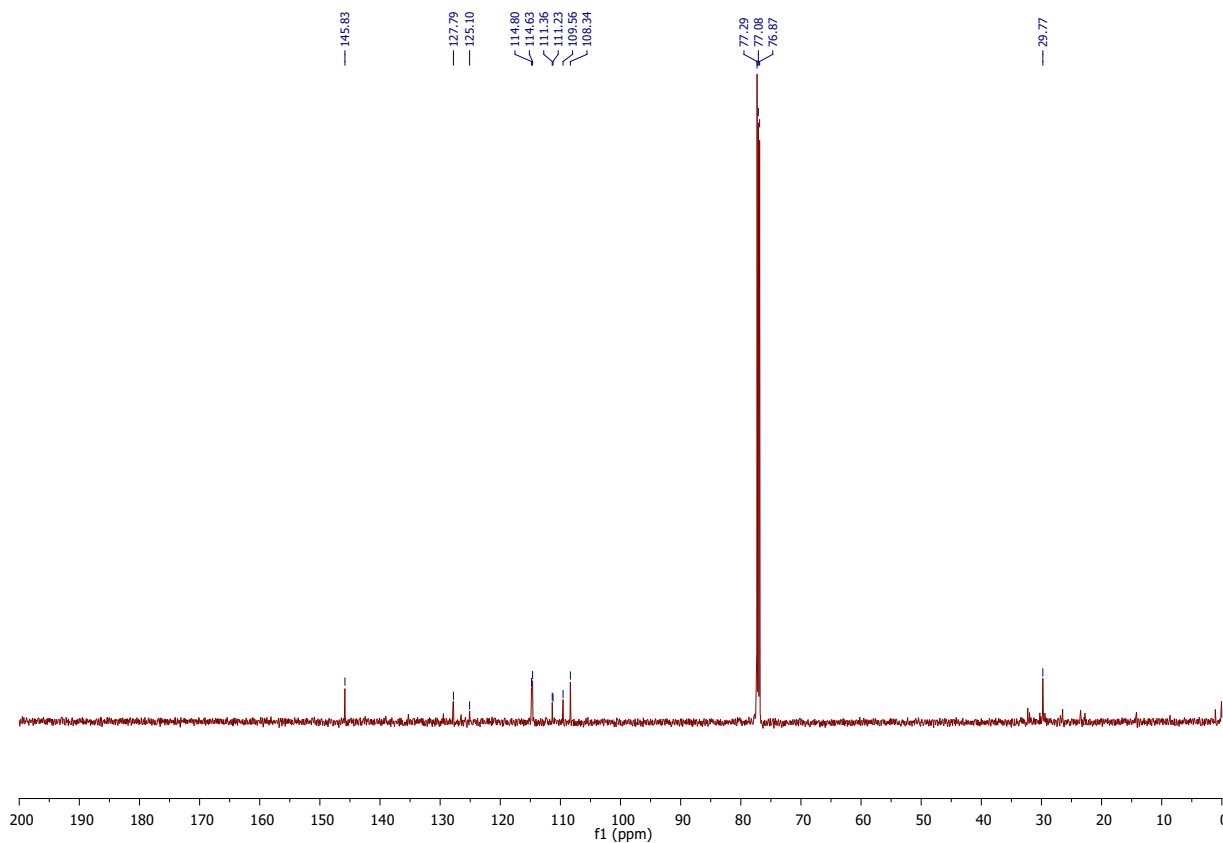

$^{19}\text{F}\{^1\text{H}\}$  NMR ( $\text{CDCl}_3$ )

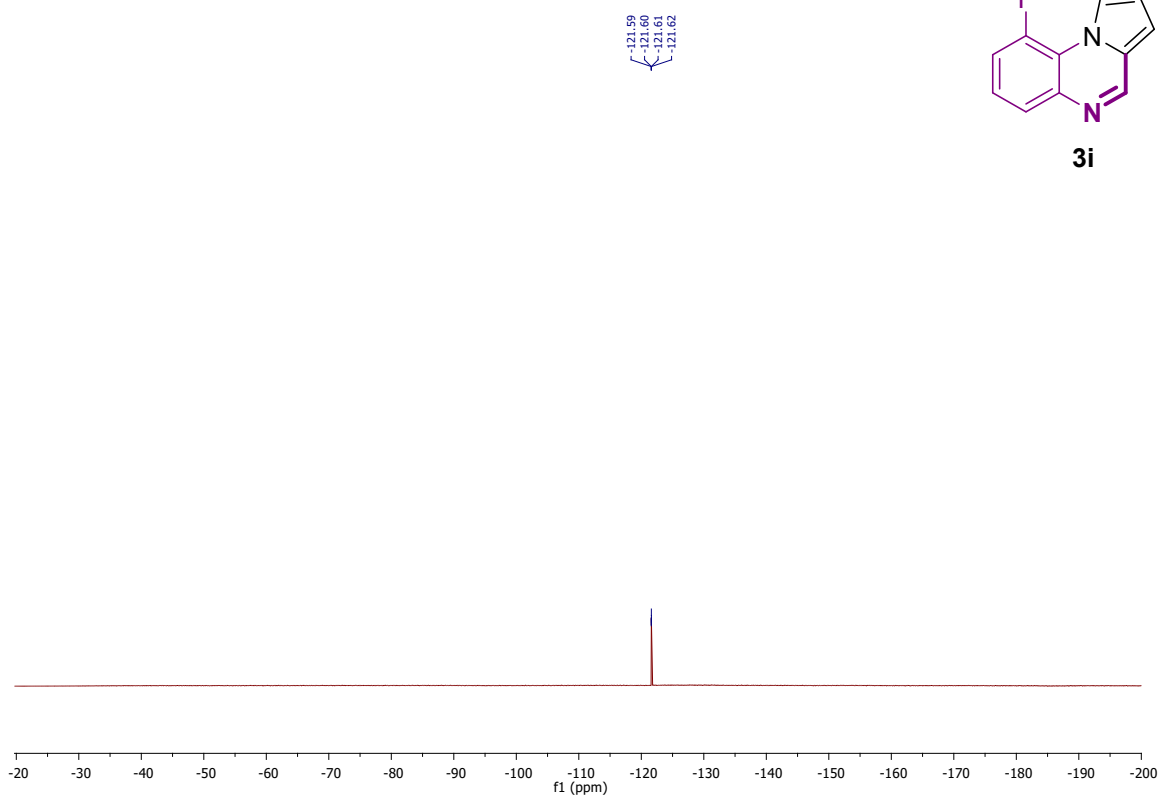

$^1\text{H}$  NMR (DMSO)

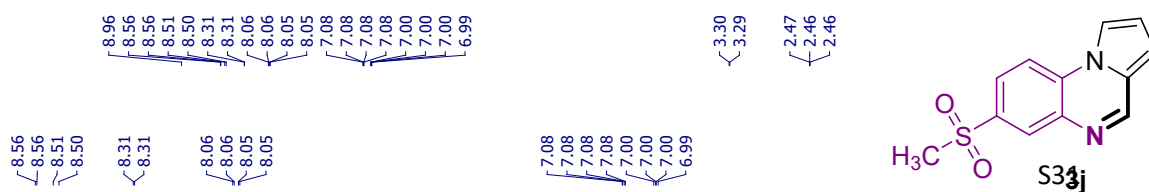

<sup>13</sup>C NMR (DMSO)

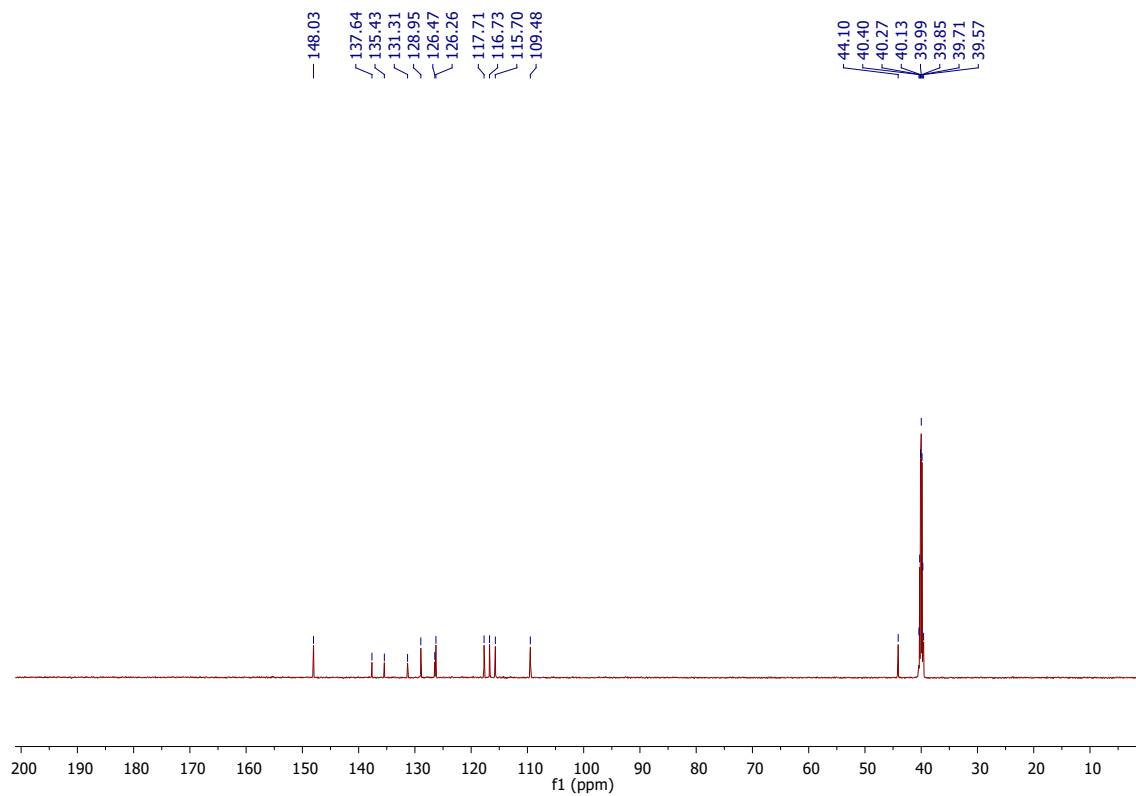

<sup>1</sup>H NMR (CDCl<sub>3</sub>)

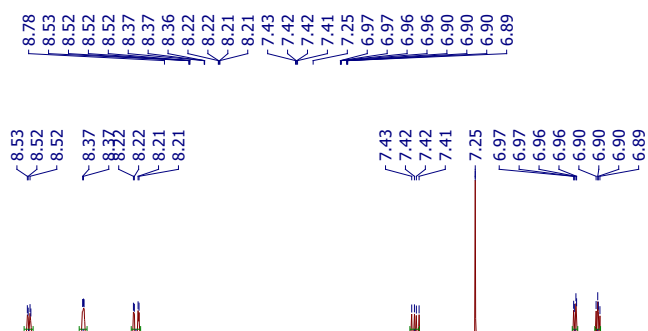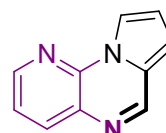

**3k**



$^{13}\text{C}$  NMR ( $\text{CDCl}_3$ )

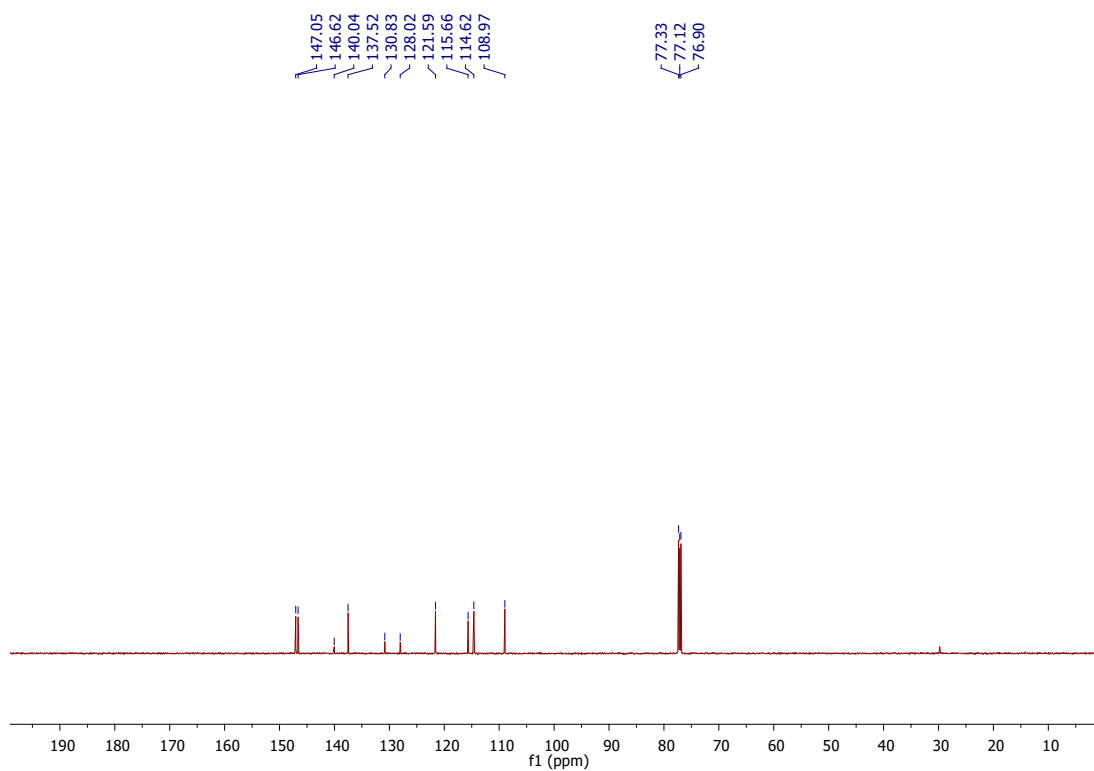

$^1\text{H}$  NMR ( $\text{CDCl}_3$ )

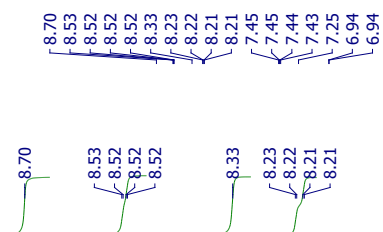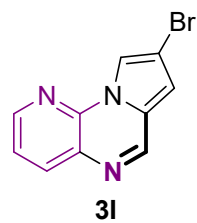

$^{13}\text{C}$  NMR ( $\text{CDCl}_3$ )

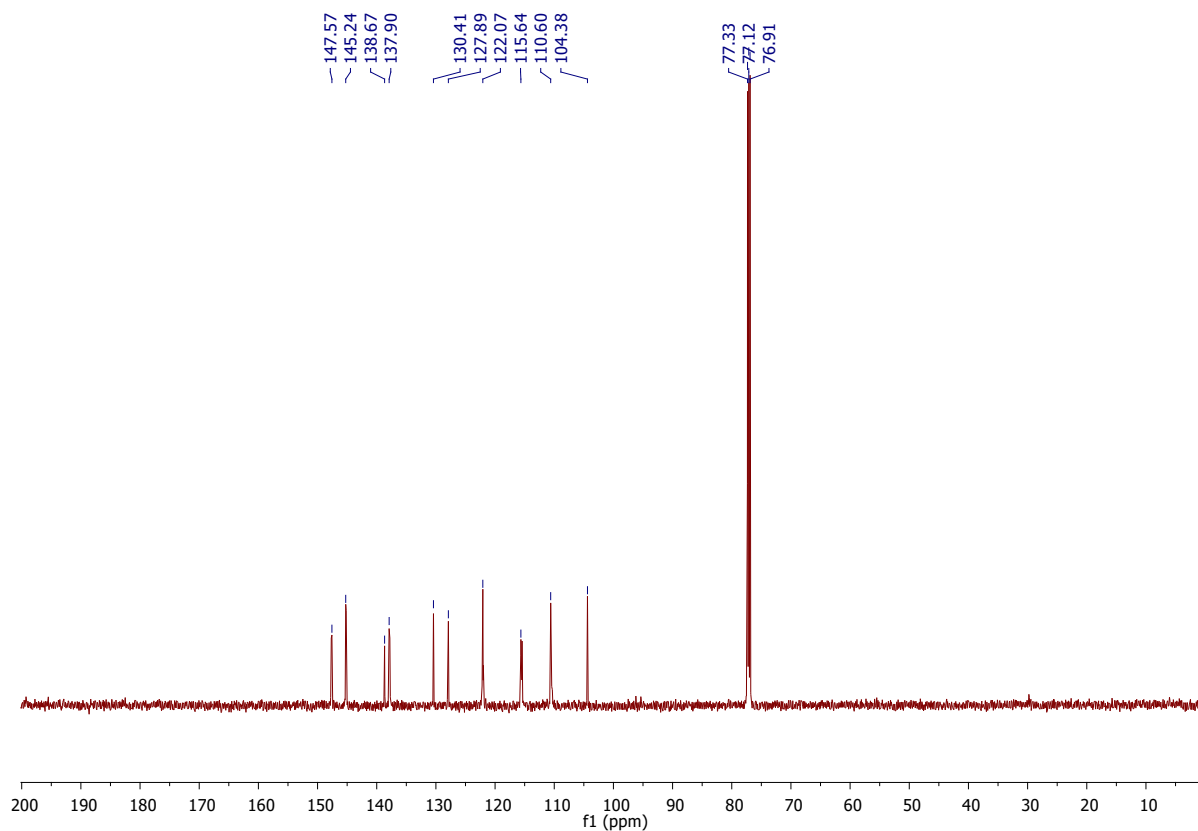

$^1\text{H}$  NMR ( $\text{CDCl}_3$ )

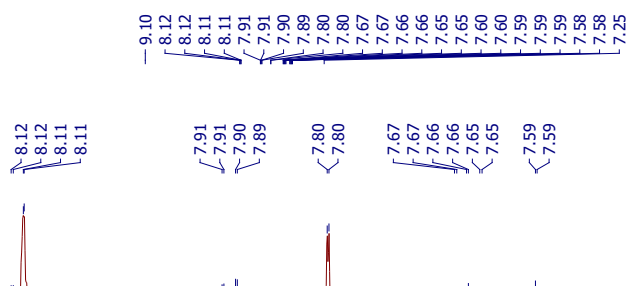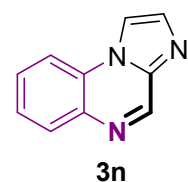

S34

$^{13}\text{C}$  NMR ( $\text{CDCl}_3$ )

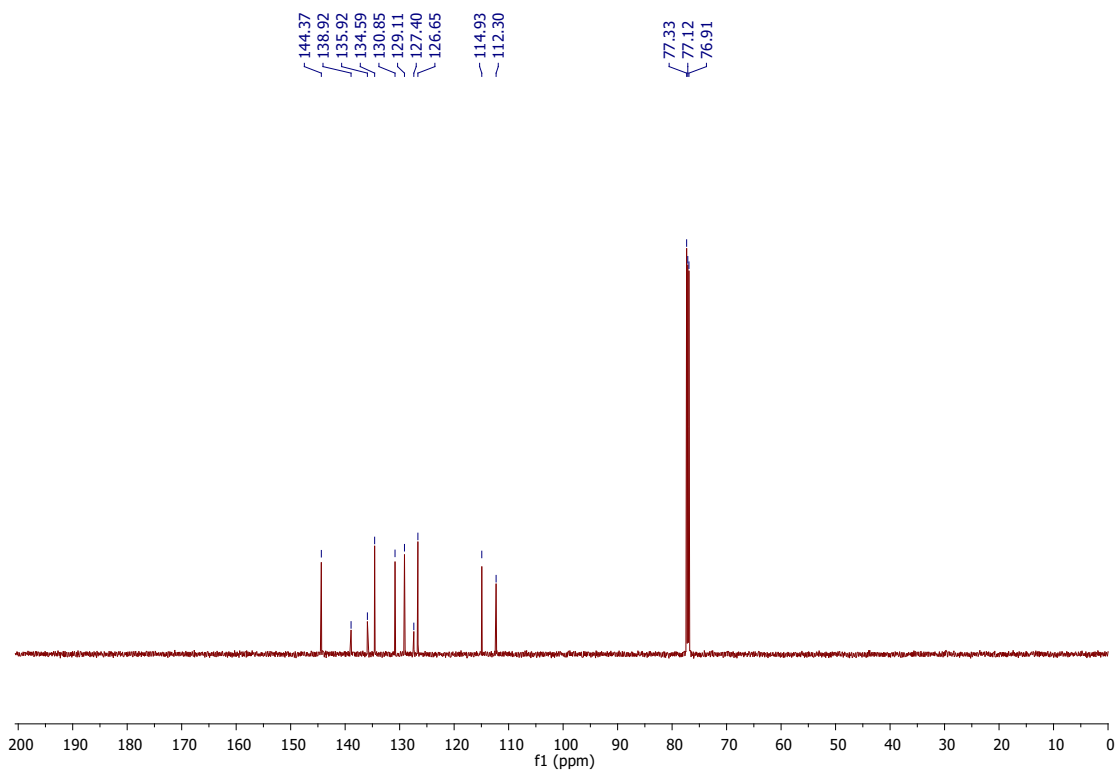

$^1\text{H}$  NMR ( $\text{CDCl}_3$ )

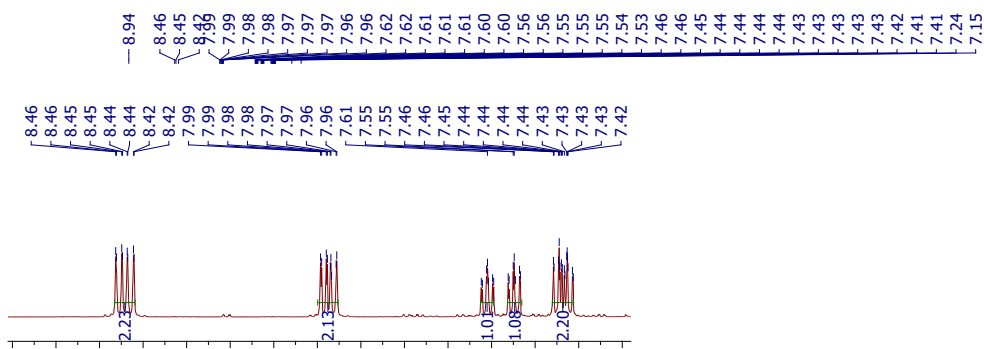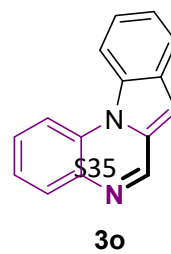

$^{13}\text{C}$  NMR ( $\text{CDCl}_3$ )

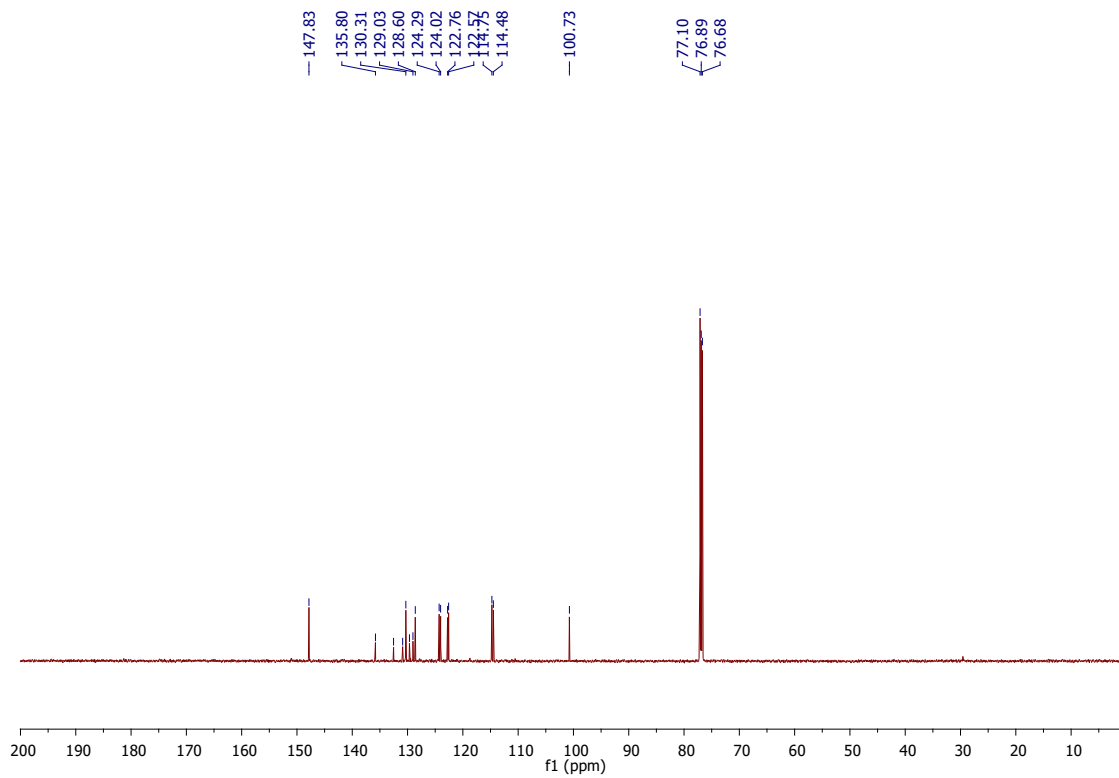

$^1\text{H}$  NMR (DMSO)

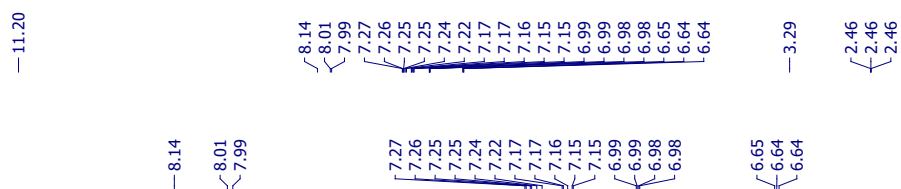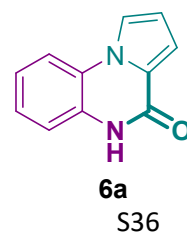

$^{13}\text{C}$  NMR (DMSO)

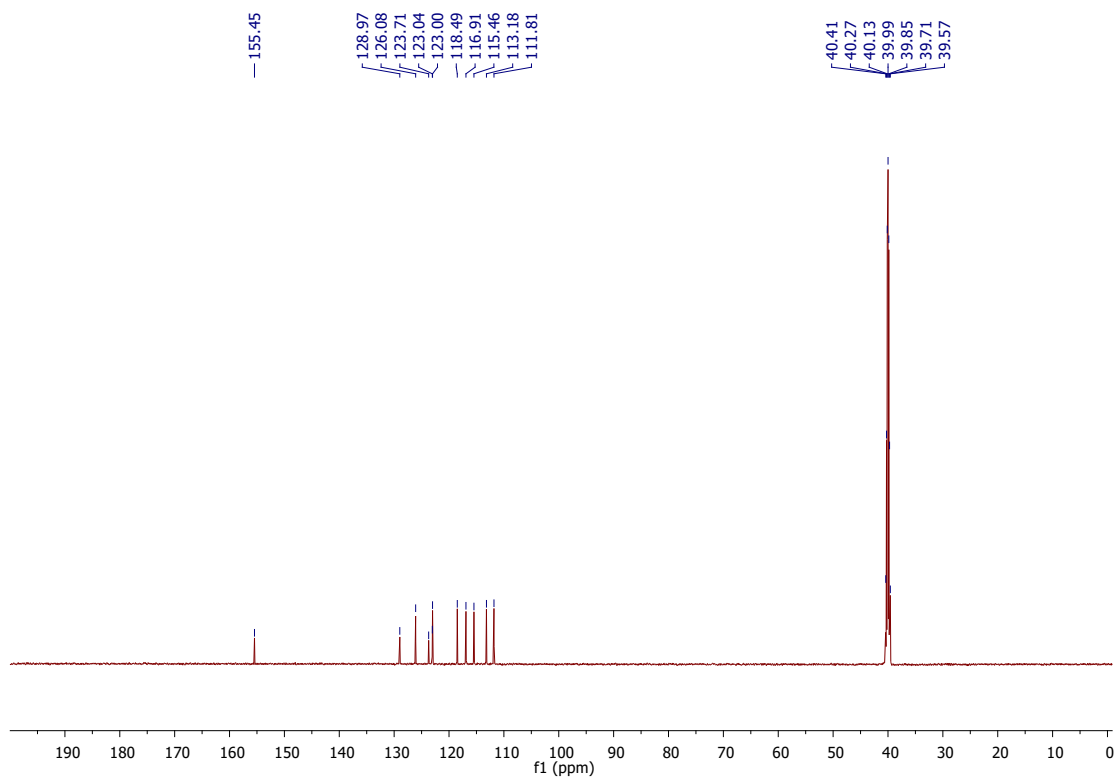

**6b**  $^1\text{H}$  NMR (DMSO)

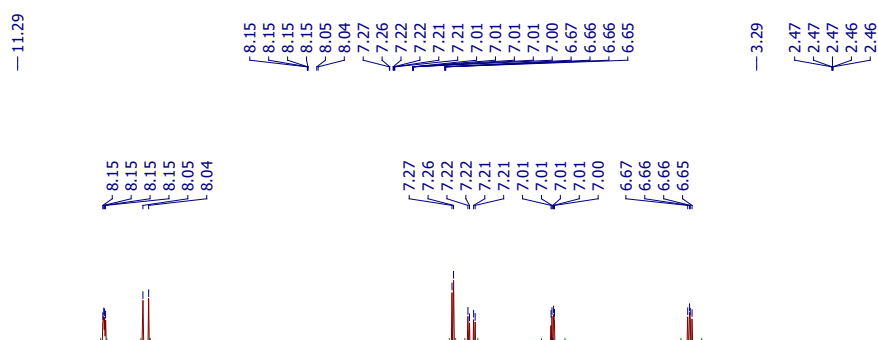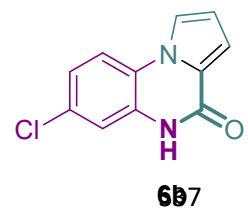

$^{13}\text{C}$  NMR (DMSO)

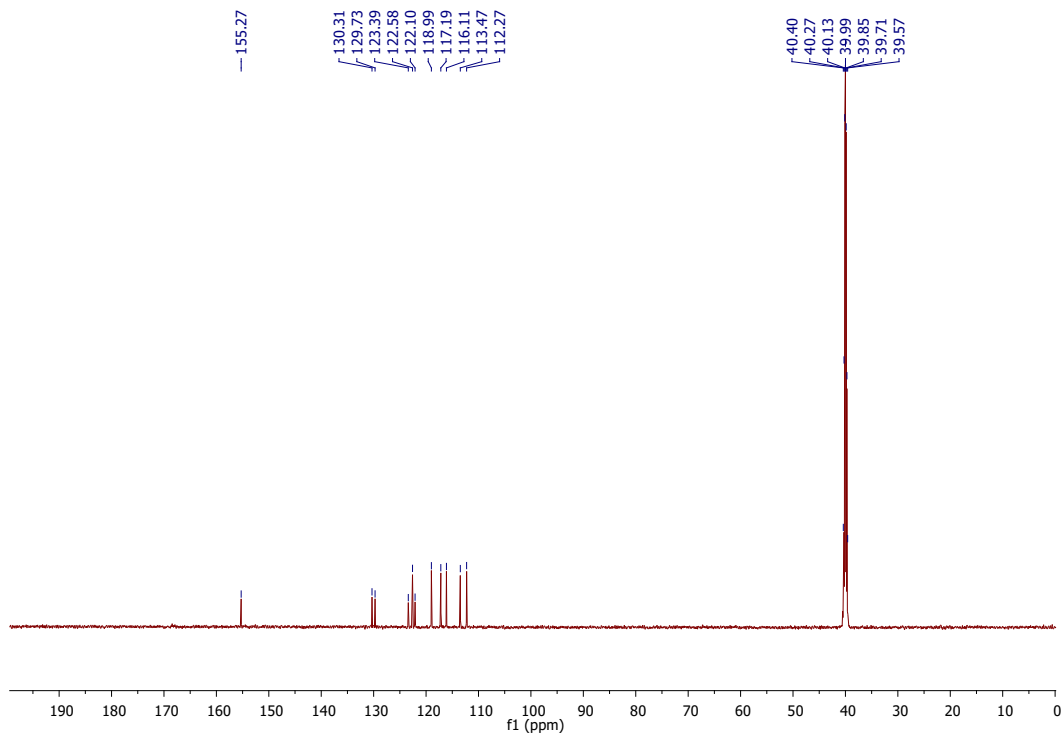

$^1\text{H}$  NMR (DMSO)

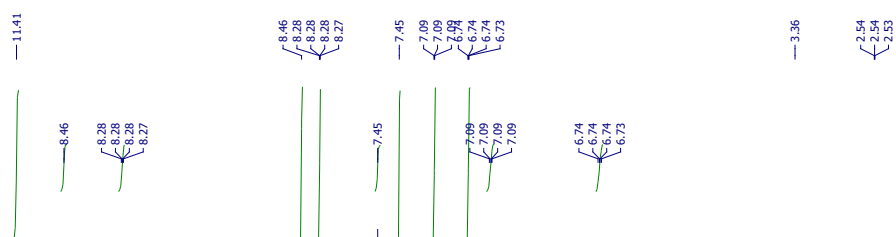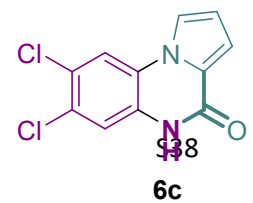

### $^{13}\text{C}$ NMR (DMSO)

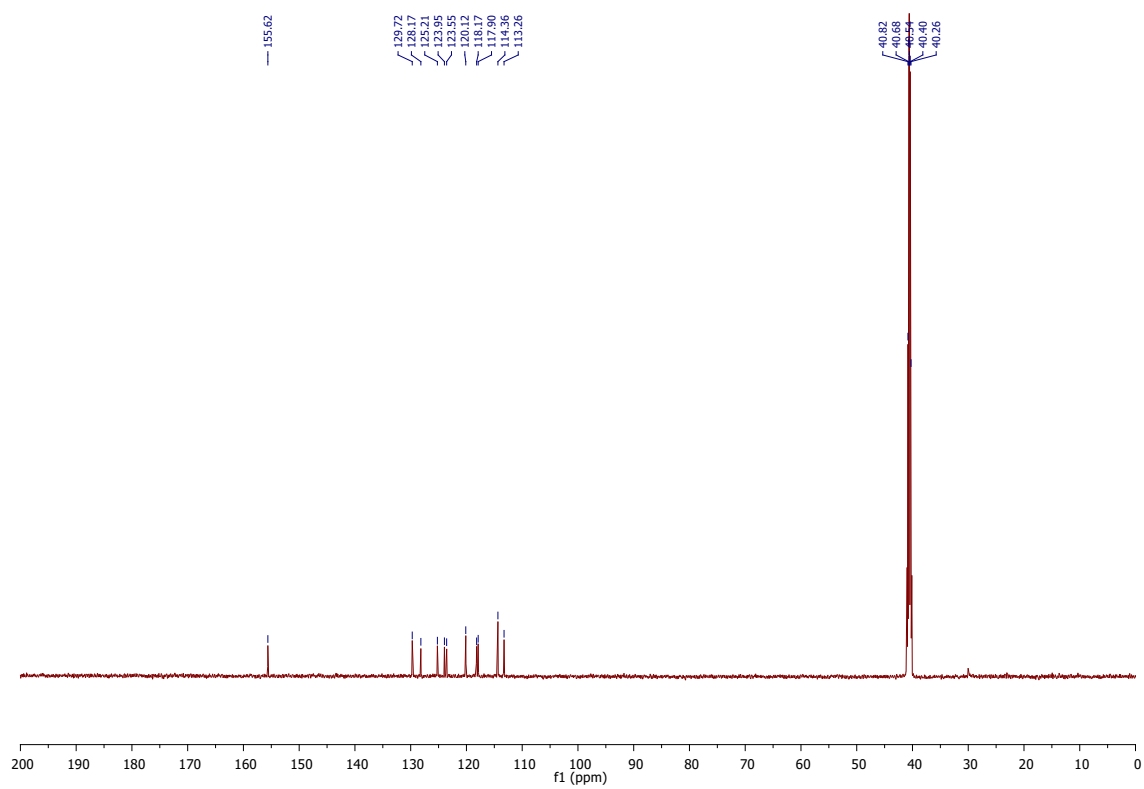

### $^1\text{H}$ NMR (DMSO)

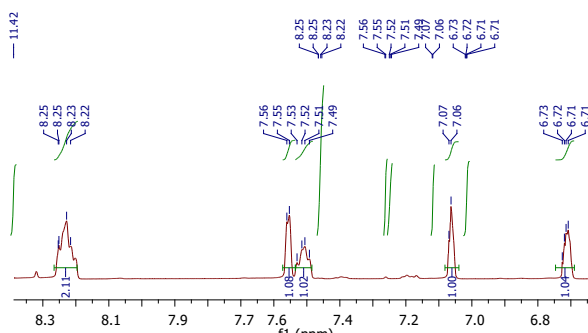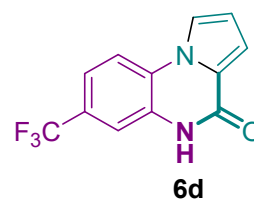

$^{13}\text{C}$  NMR (DMSO)

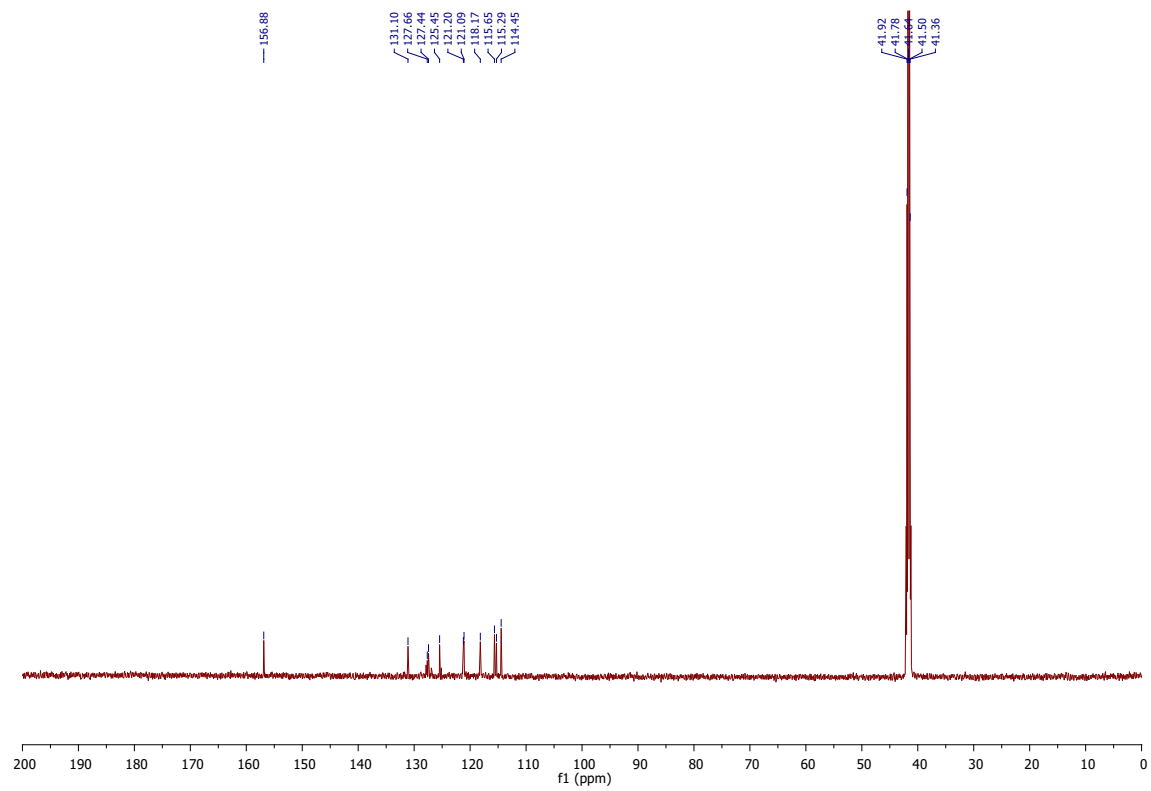

$^{19}\text{F}$  { $^1\text{H}$ } NMR (DMSO)

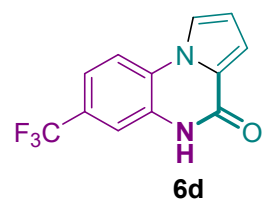



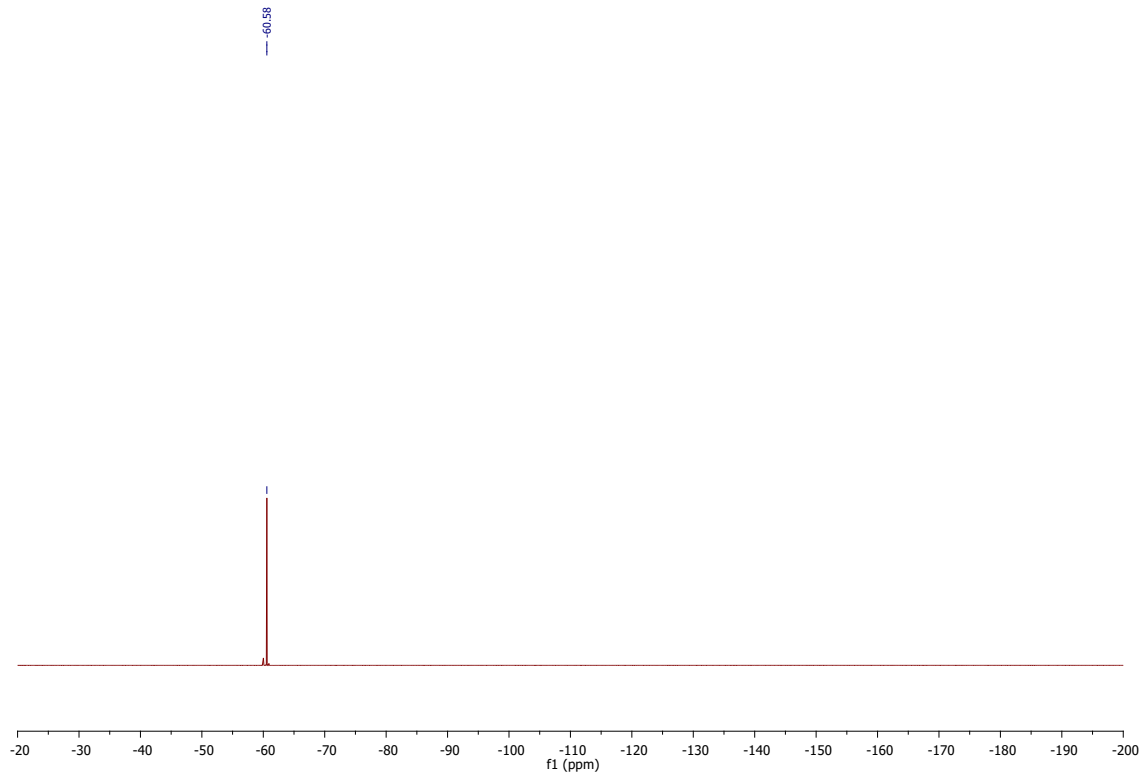

6f <sup>1</sup>H NMR (DMSO)

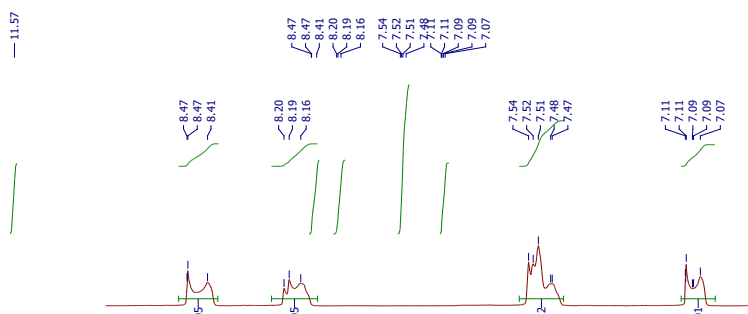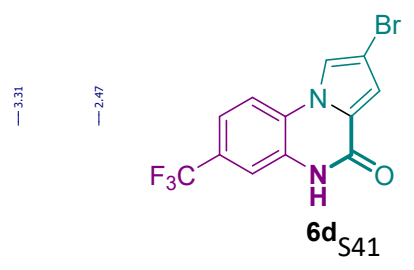

$^{13}\text{C}$  NMR (DMSO)

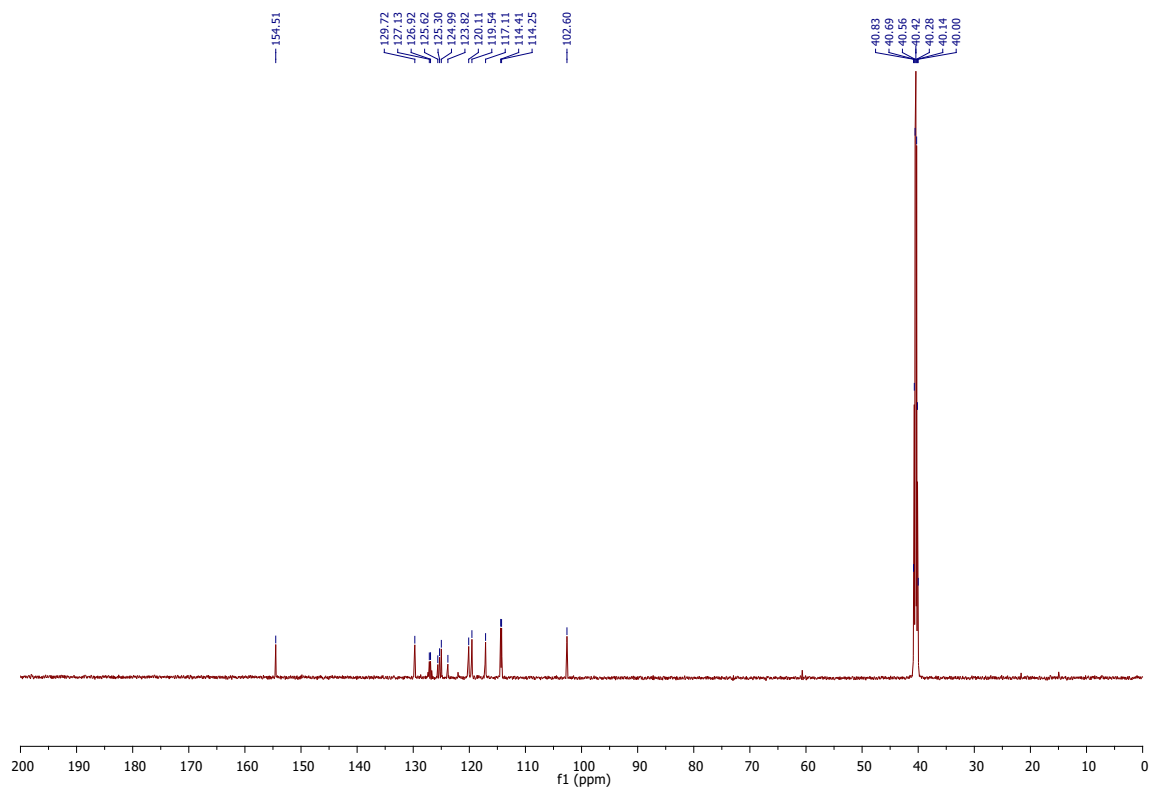

$^1\text{H}$  NMR (DMSO)

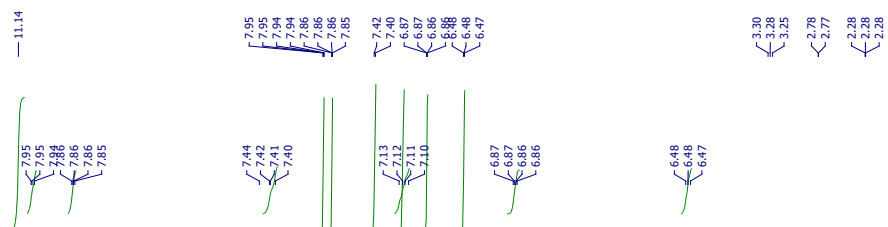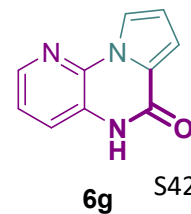

$^{13}\text{C}$  NMR (DMSO)

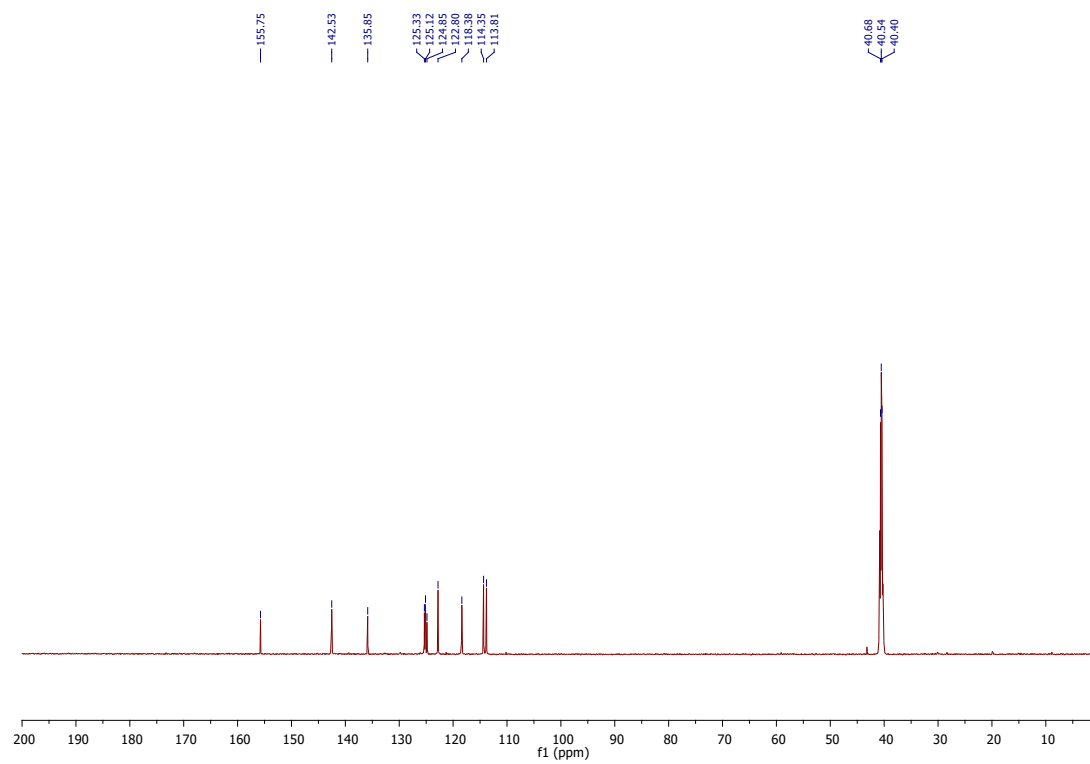

$^1\text{H}$  NMR (DMSO)

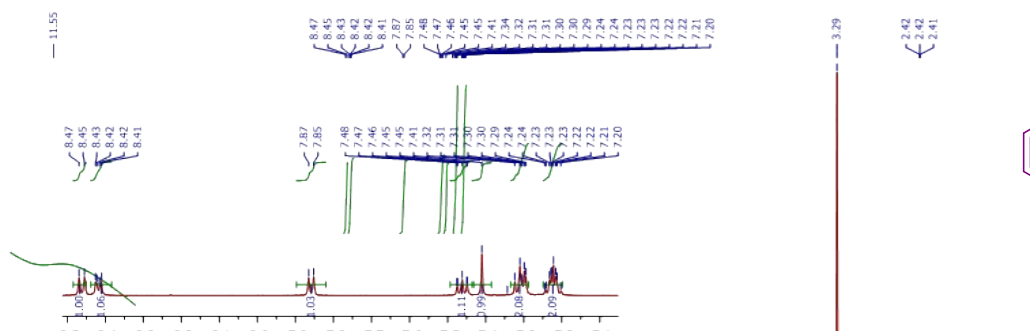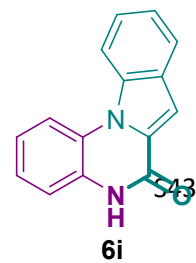

### $^{13}\text{C}$ NMR (DMSO)

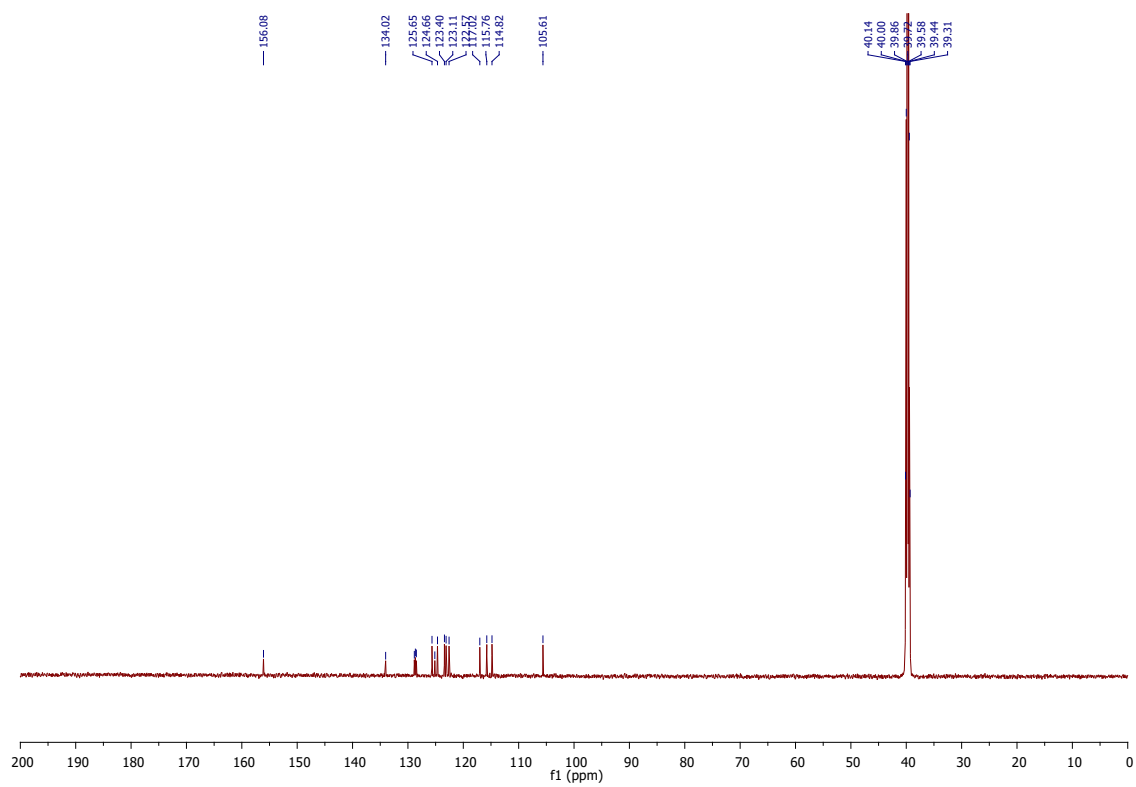

### $^1\text{H}$ NMR (DMSO)

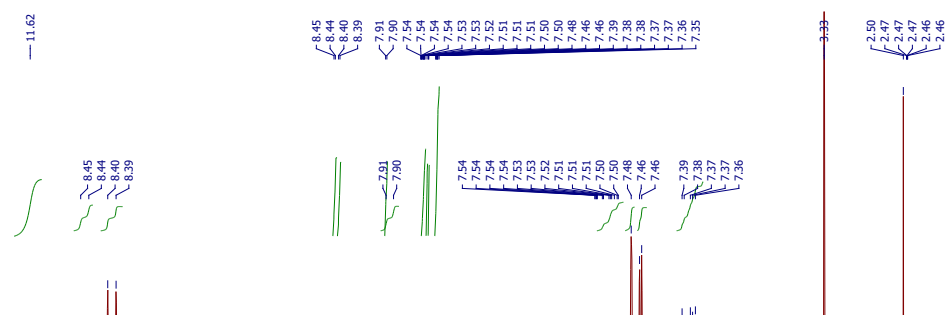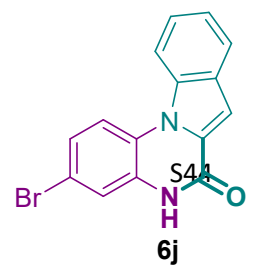

### <sup>13</sup>C NMR (DMSO)

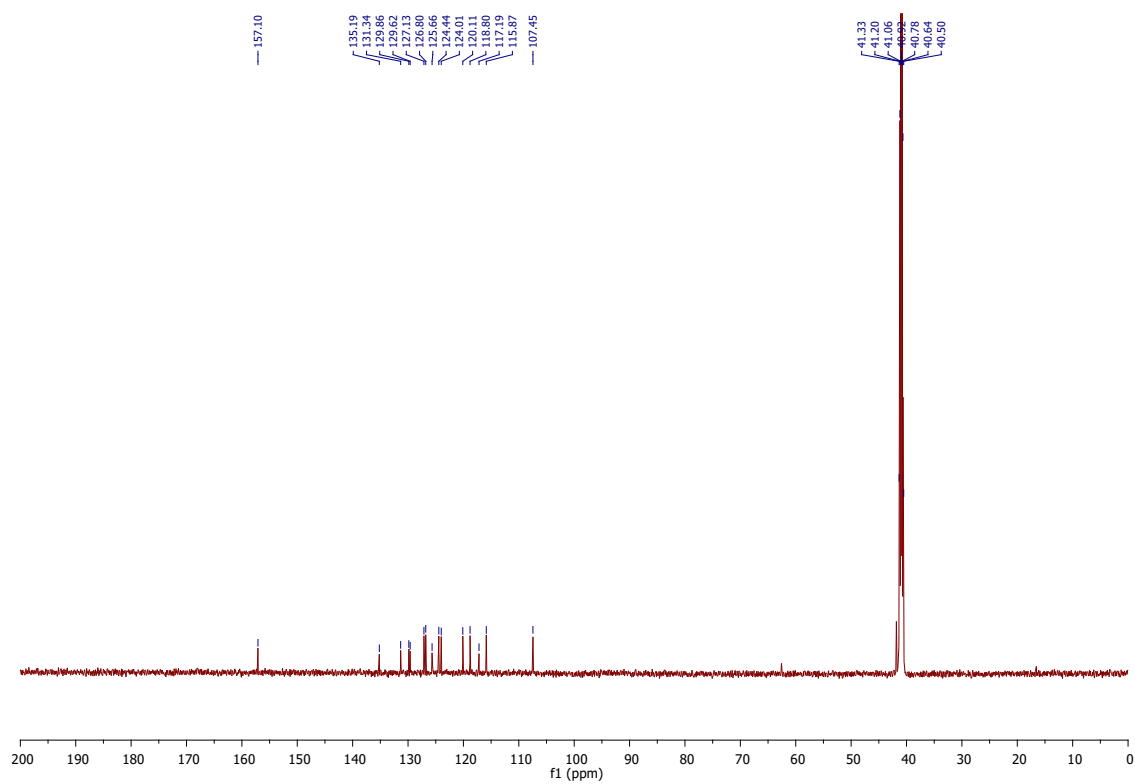

### <sup>1</sup>H NMR (DMSO)

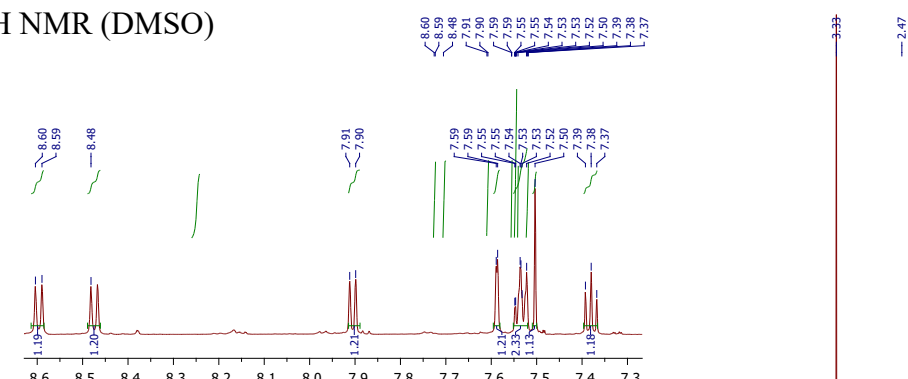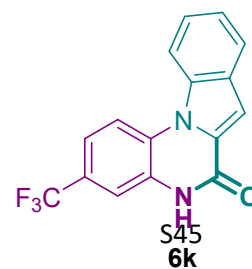

<sup>13</sup>C NMR (DMSO)

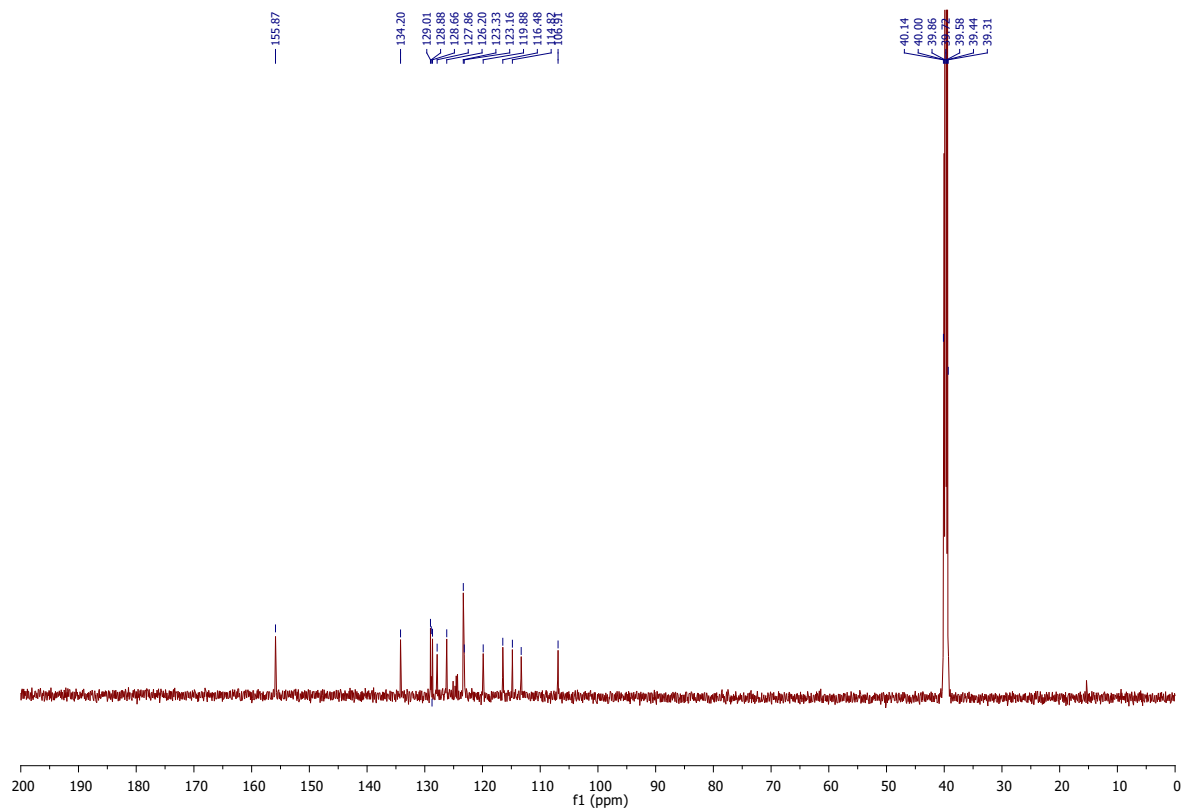

<sup>1</sup>H NMR (DMSO)

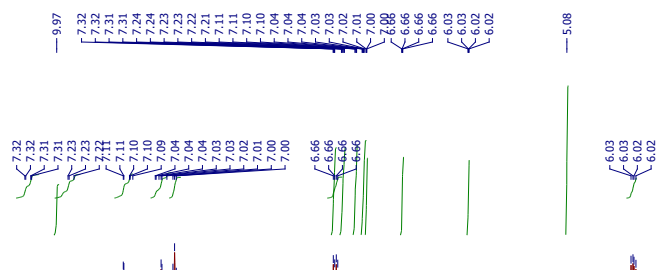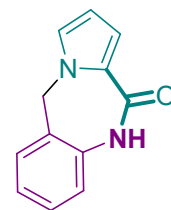

(8)

<sup>13</sup>C NMR (DMSO)

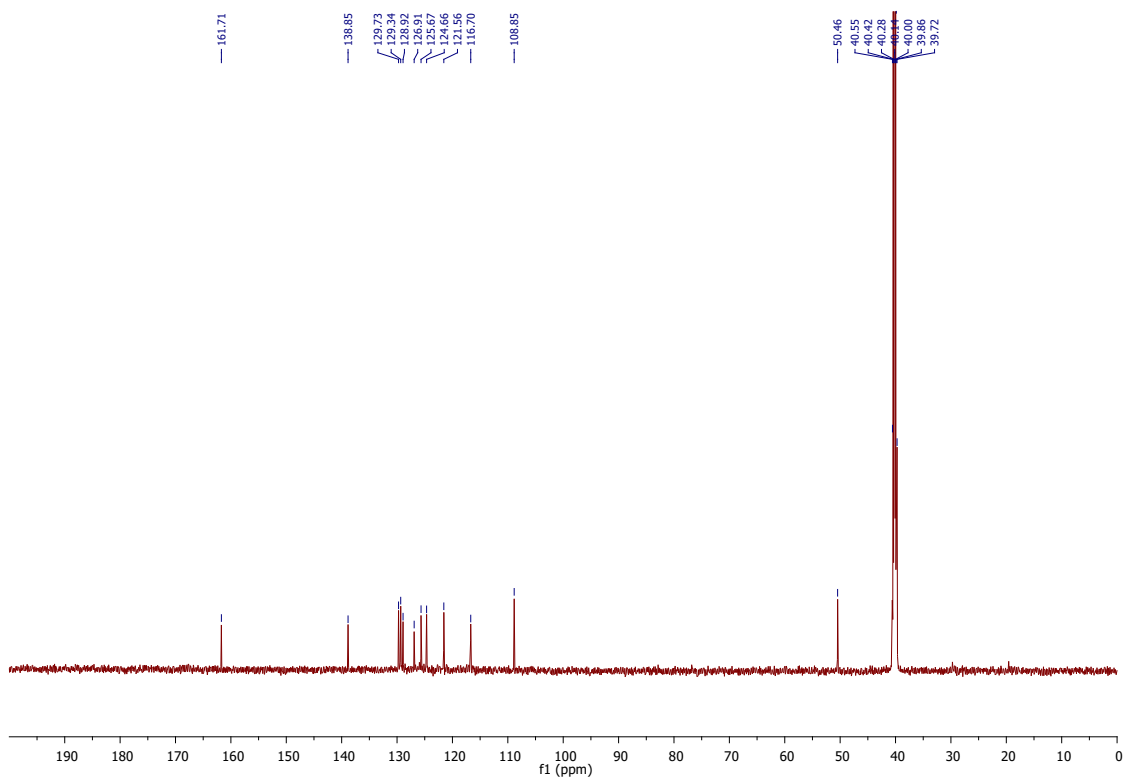

<sup>1</sup>H NMR (DMSO)

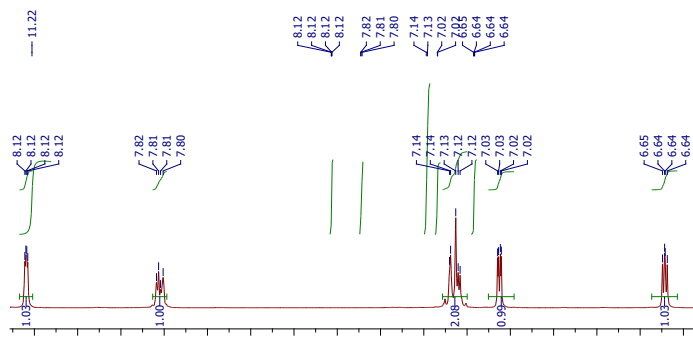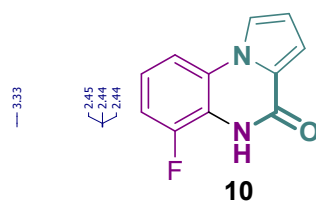

$^{13}\text{C}$  NMR (DMSO)

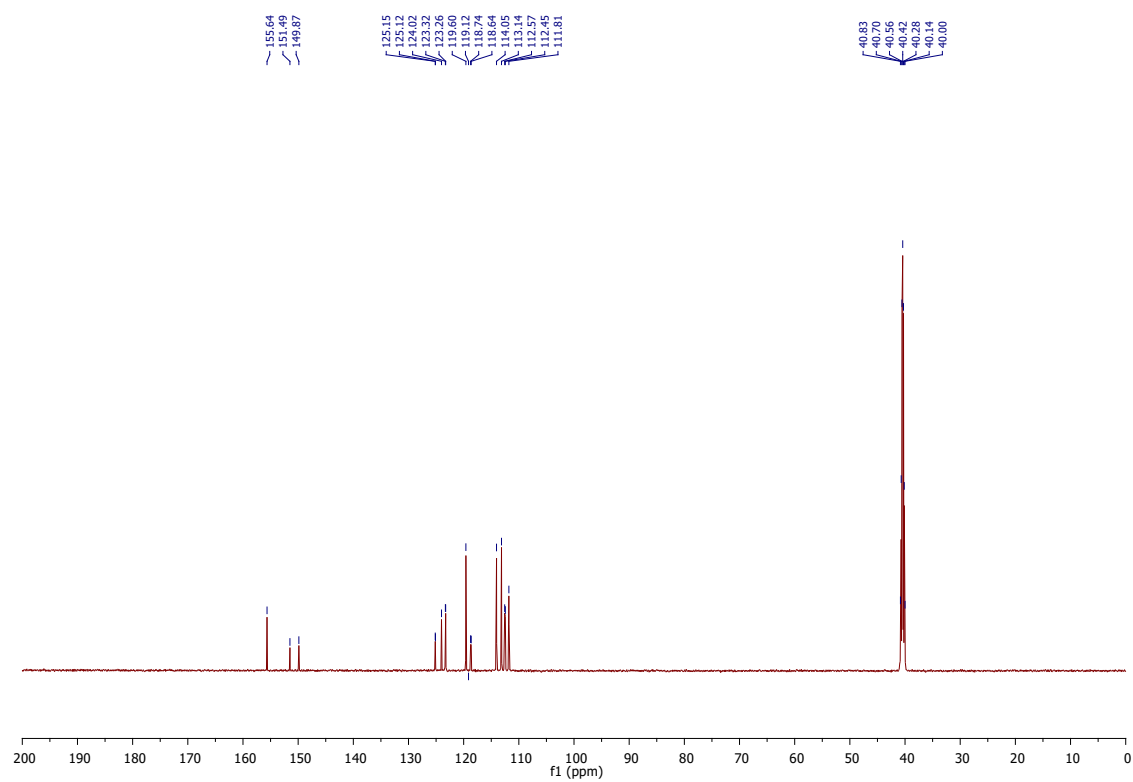

$^{19}\text{F}$  { $^1\text{H}$ } NMR (DMSO)

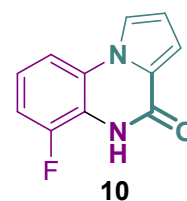



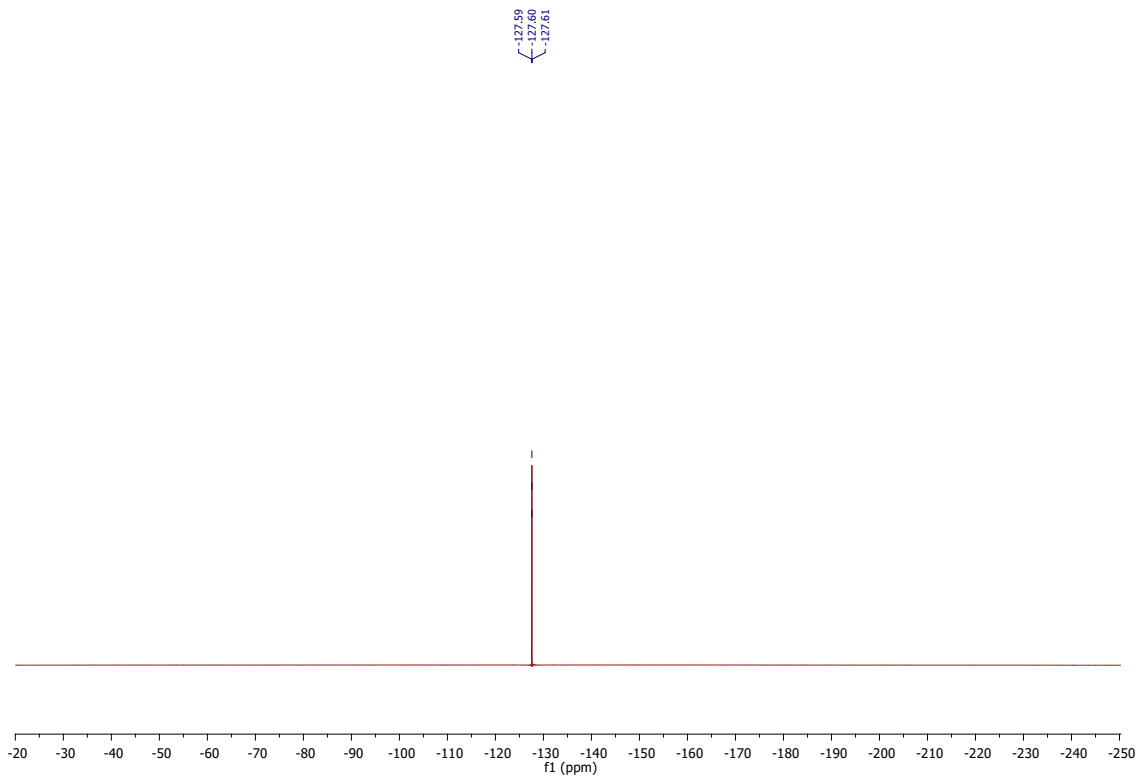

**2a** <sup>1</sup>H NMR (CDCl<sub>3</sub>)

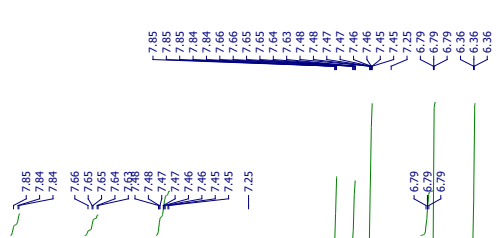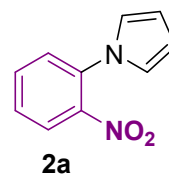

$^{13}\text{C}$  NMR ( $\text{CDCl}_3$ )

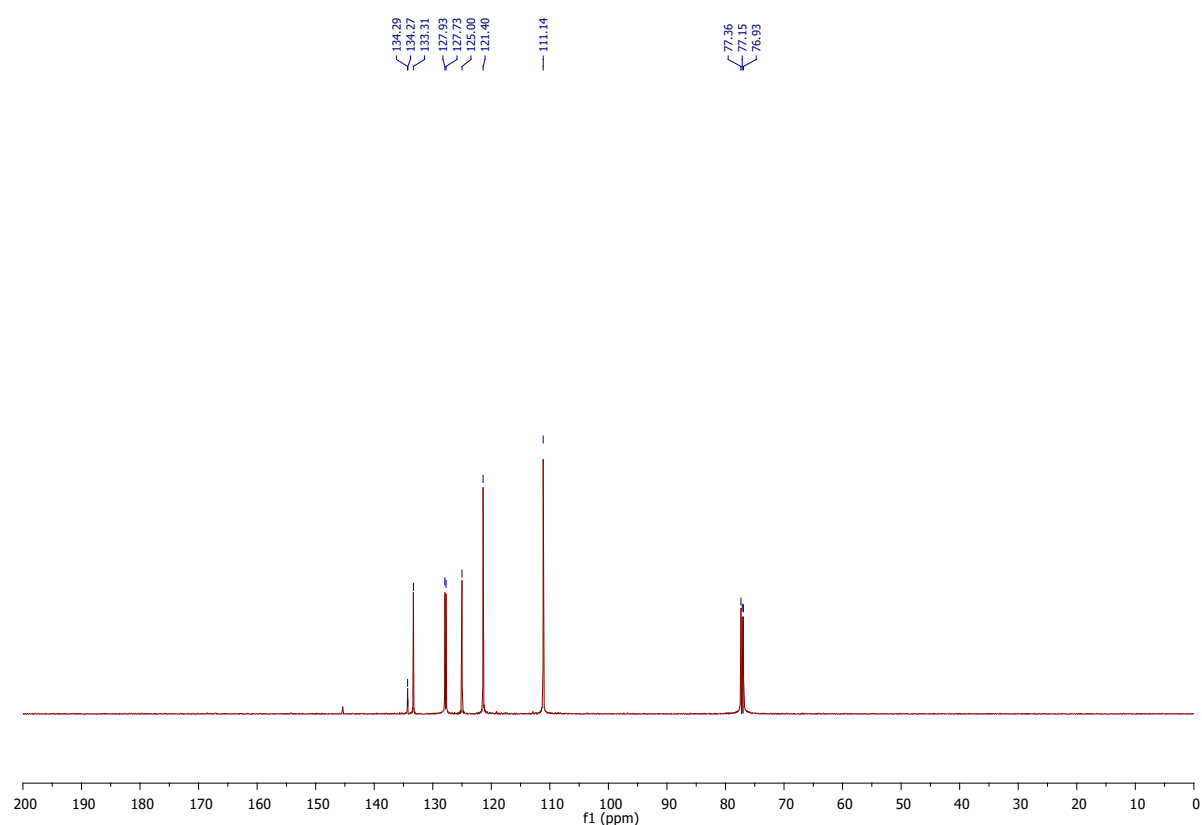

**2a'**  $^1\text{H}$  NMR ( $\text{CDCl}_3$ )

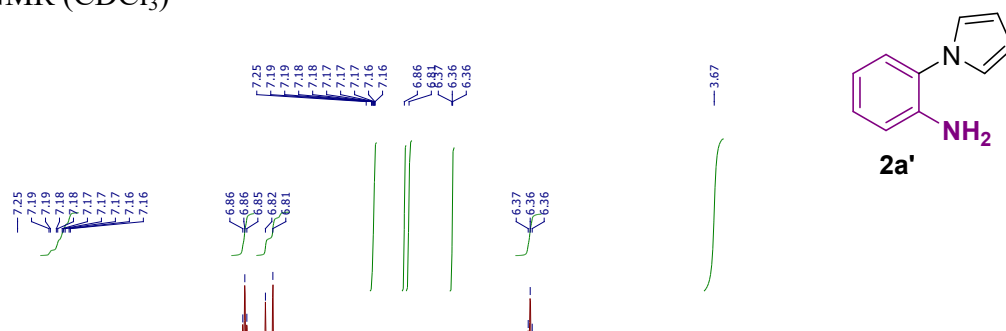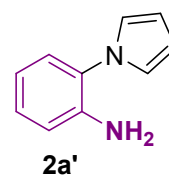

$^{13}\text{C}$  NMR ( $\text{CDCl}_3$ )

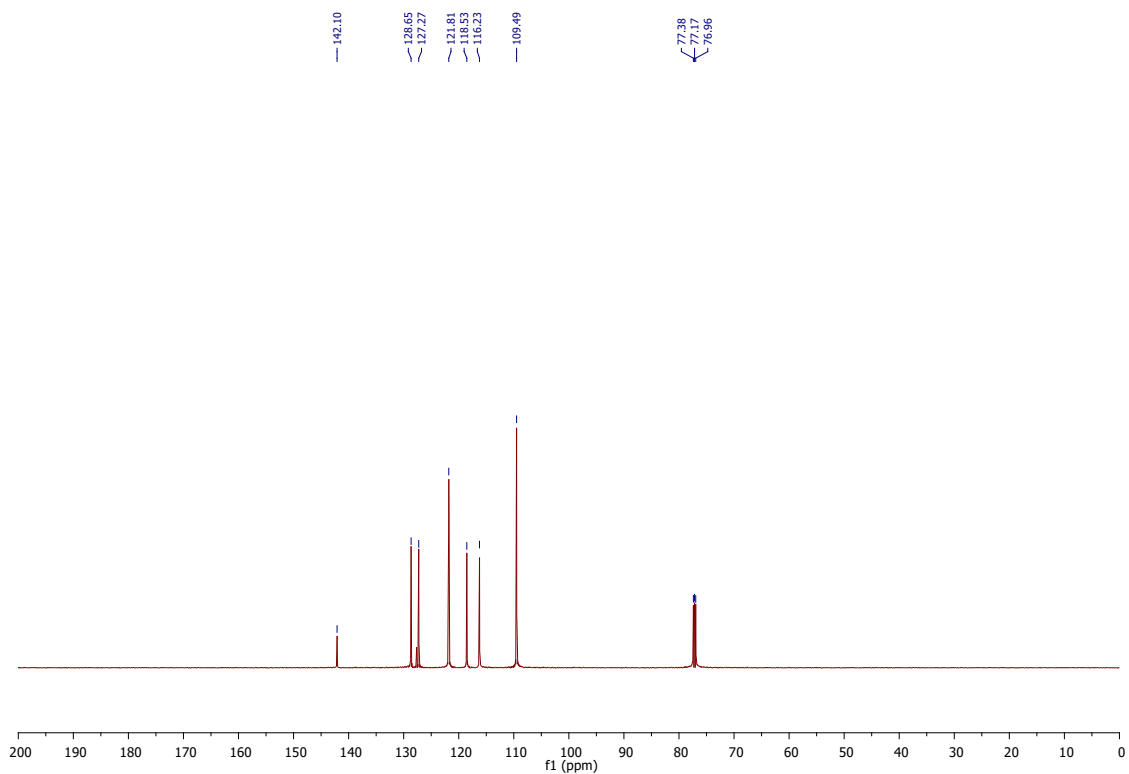

$6b'$   $^1\text{H}$  NMR (DMSO)

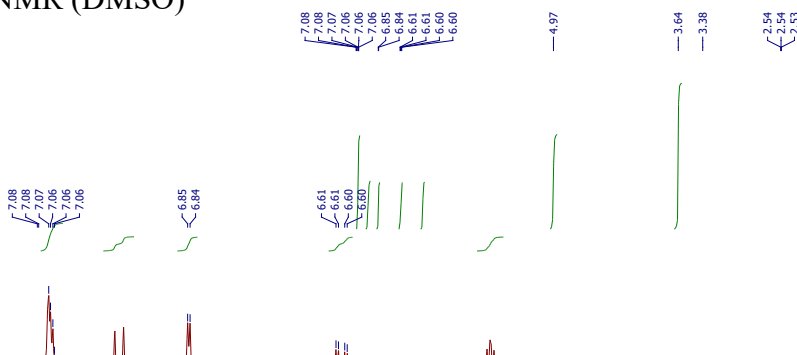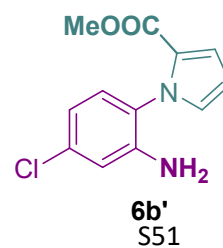

$^{13}\text{C}$  NMR (DMSO)

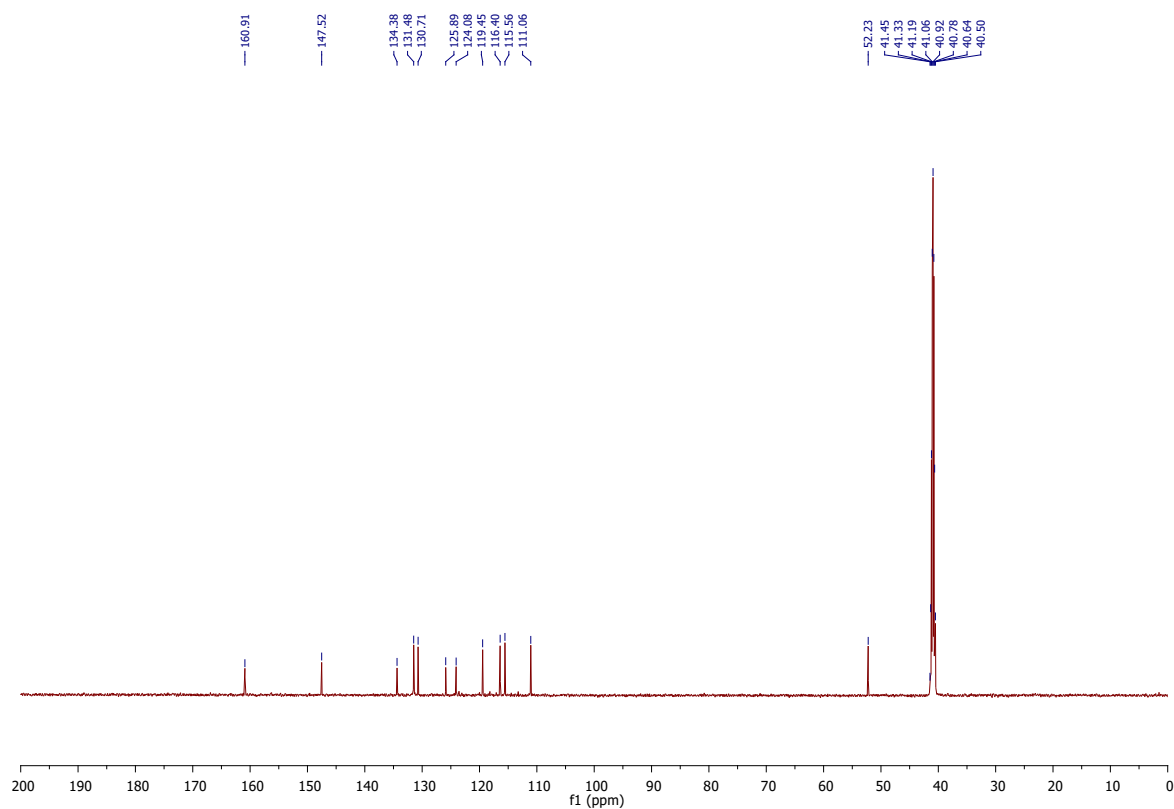

**3p**  $^1\text{H}$  NMR ( $\text{CDCl}_3$ )

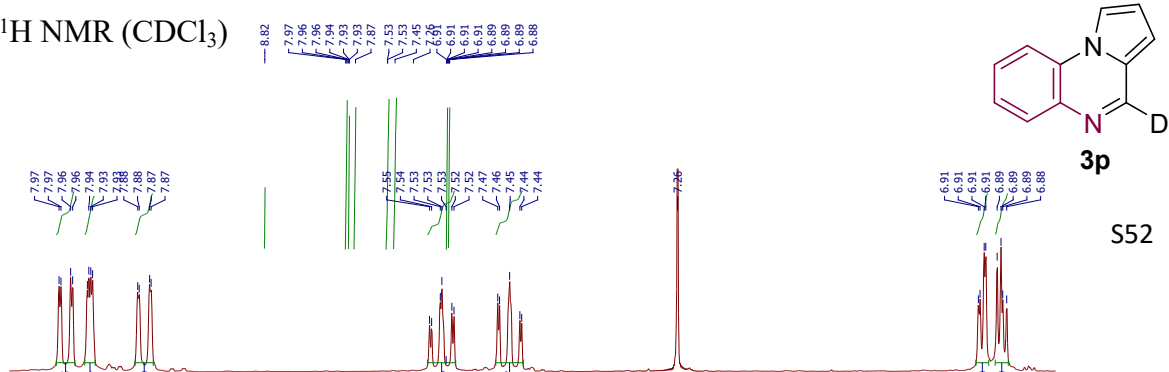

$^{13}\text{C}$  NMR ( $\text{CDCl}_3$ )

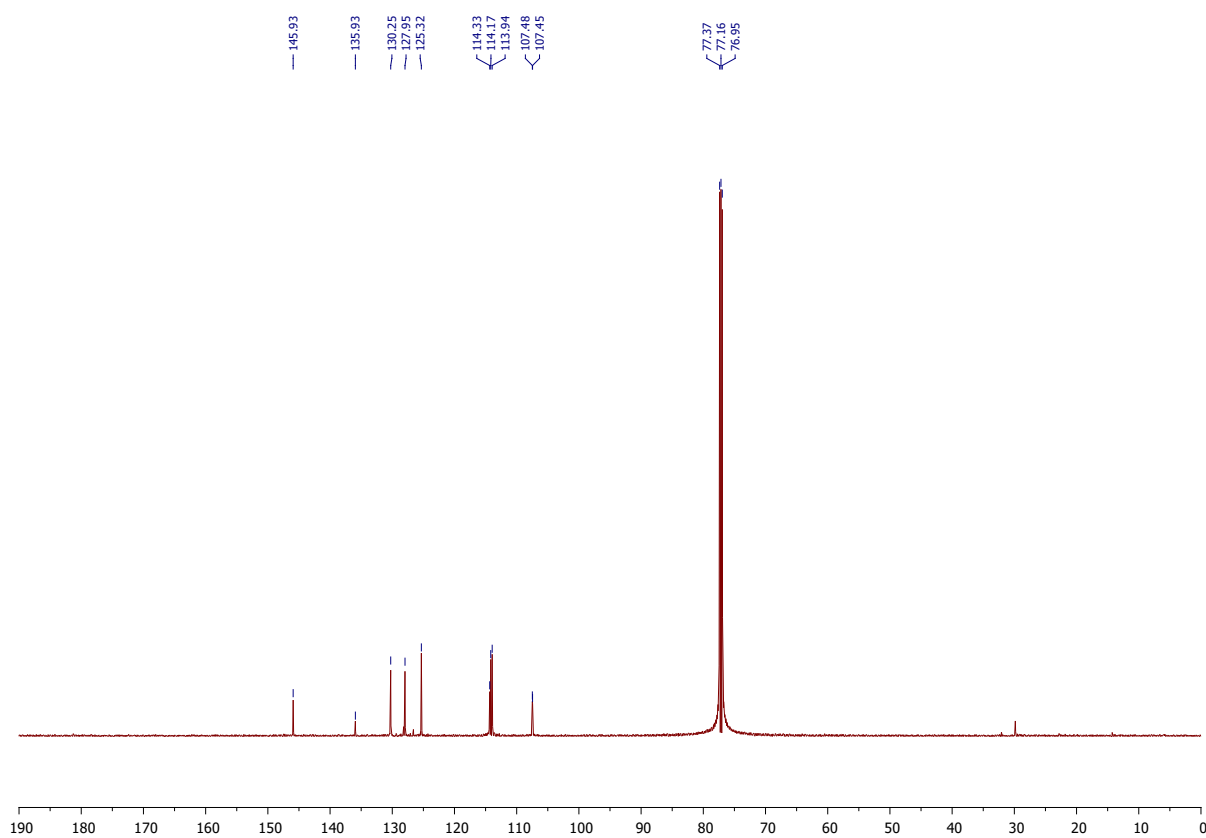

## 7. MASS SPECTRA

HRMS data of 3a

### Sample Chromatograms

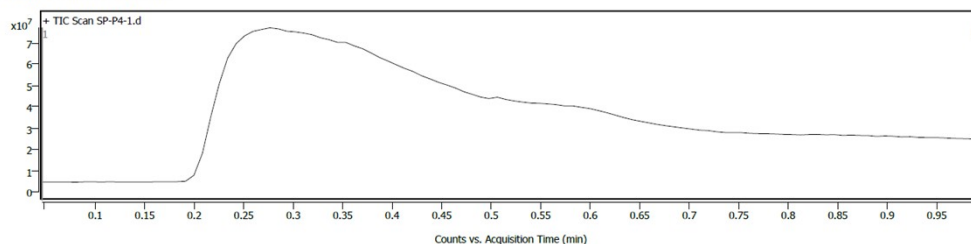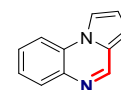

Molecular Formulae  $C_{22}H_{16}N_4O$   
 Exact Mass : 168.0867  
 (M+H)<sup>+</sup> : 169.0778 (observed)

### Peak Spec

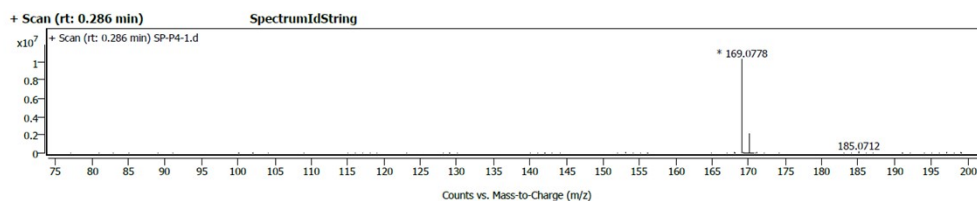

| SpectrumIdString |   | Abund    | Abund % | m/z (Calc) | Diff (ppm) | Ion Species | Formula | Ion Type |
|------------------|---|----------|---------|------------|------------|-------------|---------|----------|
| m/z              | Z |          |         |            |            |             |         |          |
| 169.0778         | 1 | 10325208 | 100.00  |            |            |             |         |          |
| 170.0800         | 1 | 2145435  | 20.78   |            |            |             |         |          |
| 171.0829         | 1 | 106114   | 1.03    |            |            |             |         |          |
| 185.0712         |   | 147543   | 1.43    |            |            |             |         |          |

## HRMS data of 6a

### Sample Chromatograms

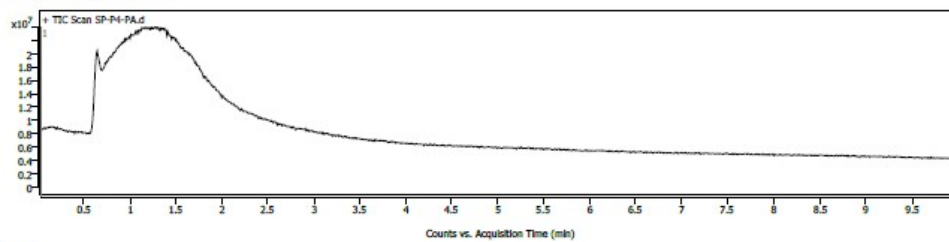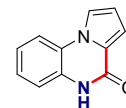

Molecular Formulae  $C_{11}H_8N_2O$   
 Exact Mass : 184.0637  
 (M+H)<sup>+</sup> : 185.0711 (observed)

### Peak Spec

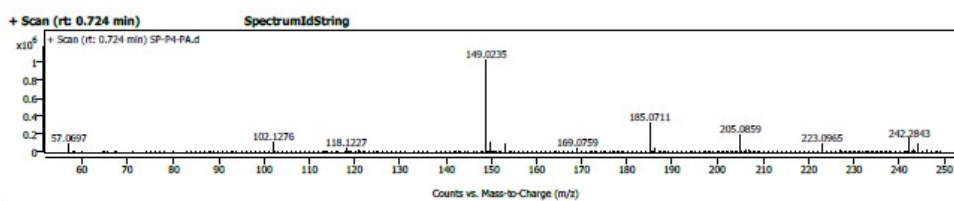

| SpectrumIdString |   | Abund   | Abund % | m/z (Calc) | Diff (ppm) | Ion Species | Formula | Ion Type |
|------------------|---|---------|---------|------------|------------|-------------|---------|----------|
| m/z              | Z |         |         |            |            |             |         |          |
| 57.0697          |   | 83310   | 8.19    |            |            |             |         |          |
| 102.1276         |   | 108903  | 10.71   |            |            |             |         |          |
| 118.1227         |   | 36737   | 3.61    |            |            |             |         |          |
| 121.0204         |   | 27398   | 2.69    |            |            |             |         |          |
| 149.0235         | 1 | 1016968 | 100.00  |            |            |             |         |          |
| 149.0387         |   | 41942   | 4.12    |            |            |             |         |          |
| 149.0509         |   | 49203   | 4.84    |            |            |             |         |          |
| 150.0268         | 1 | 98409   | 9.68    |            |            |             |         |          |
| 153.1386         |   | 85277   | 8.39    |            |            |             |         |          |
| 169.0759         |   | 41311   | 4.06    |            |            |             |         |          |
| 185.0711         | 1 | 323808  | 31.84   |            |            |             |         |          |
| 186.0744         | 1 | 45037   | 4.43    |            |            |             |         |          |

## HRMS data of 2a'

### Sample Chromatograms

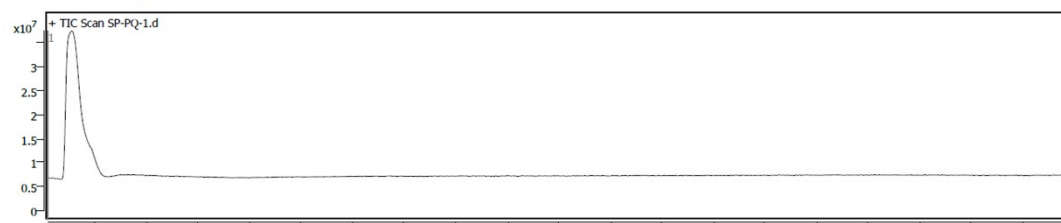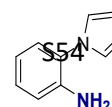

Molecular Formulae  $C_{10}H_{10}N_2$   
 Exact Mass : 158.0844  
 (M+H)<sup>+</sup> : 159.0919 (observed)

## LCMS data of standard reaction to form 3a

### Sample Chromatograms

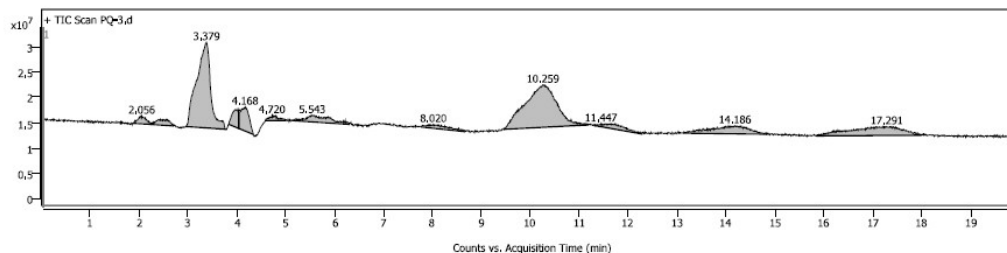

### Chromatogram Peaks

| Peak | RT     | Height   | Area      | Area % |
|------|--------|----------|-----------|--------|
| 1    | 2.056  | 1560180  | 17899572  | 4.69   |
| 2    | 2.438  | 1173505  | 21260012  | 5.57   |
| 3    | 3.379  | 17005193 | 337750619 | 88.49  |
| 4    | 3.999  | 3633901  | 31424129  | 8.23   |
| 5    | 4.168  | 4790685  | 59840670  | 15.68  |
| 6    | 4.720  | 1024214  | 12844032  | 3.37   |
| 7    | 5.543  | 1311083  | 47066883  | 12.33  |
| 8    | 8.020  | 795119   | 24962492  | 6.54   |
| 9    | 10.259 | 8434135  | 381678943 | 100.00 |
| 10   | 11.447 | 604176   | 29866075  | 7.82   |
| 11   | 14.186 | 1627907  | 84351486  | 22.10  |
| 12   | 17.291 | 1755375  | 130761199 | 34.26  |

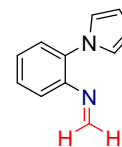

Molecular Formulae C<sub>11</sub>H<sub>10</sub>N<sub>2</sub>  
Exact Mass: 170.0844

### Peak Spec

+ Scan (rt: 1.895-2.234 min)

SpectrumIdString

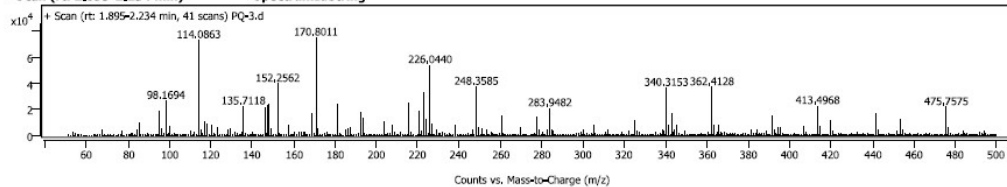

SpectrumIdString

| m/z      | Z | Abund | Abund % | m/z (Calc) | Diff (ppm) | Ion Species | Formula | Ion Type |
|----------|---|-------|---------|------------|------------|-------------|---------|----------|
| 95.0350  |   | 18983 | 25.34   |            |            |             |         |          |
| 98.1694  |   | 26530 | 35.41   |            |            |             |         |          |
| 114.0863 |   | 73031 | 97.47   |            |            |             |         |          |
| 135.7118 | 2 | 22191 | 29.62   |            |            |             |         |          |
| 146.0312 |   | 20923 | 27.93   |            |            |             |         |          |
| 147.1565 |   | 27967 | 30.65   |            |            |             |         |          |
| 148.1724 |   | 23520 | 31.39   |            |            |             |         |          |
| 152.2562 |   | 39632 | 52.90   |            |            |             |         |          |
| 170.8011 |   | 74925 | 100.00  |            |            |             |         |          |
